# Supplementary material
Source: PubMed Central journal article supplement (PMC3563398)

**Supporting Information**  
for  
**Selective Esterifications of Primary Alcohols in a Water Containing Solvent**

Yong Wang, Bilal A. Aleiwi, Qinghui Wang, and Michio Kurosu\*

Department of Pharmaceutical Sciences, College of Pharmacy, University of Tennessee

Health Science Center, 881 Madison, Memphis, TN 38163-0001

[mkurosu@uthsc.edu](mailto:mkurosu@uthsc.edu)

**Table of Contents**

|                                                                            |         |
|----------------------------------------------------------------------------|---------|
| Table of contents-----                                                     | S1      |
| General -----                                                              | S2      |
| Experimental Procedures-----                                               | S3-S10  |
| Copies of <sup>1</sup> H and <sup>13</sup> C NMR spectra -----             | S11-S58 |
| Determination of racemization of the optically active esters via HPLC----- | S59-S67 |

## General

All reactions were carried out using oven-dried glassware, assembled hot and cooled under a stream of nitrogen before use. Reactions with air sensitive materials were carried out by standard syringe techniques. Commercially available reagents were used as received without further purification. Analytical thin-layer chromatography was performed with 0.25 mm coated commercial silica gel plates (EMD, Silica Gel 60F<sub>254</sub>) visualizing at 254 nm, or developed with ceric ammonium molybdate or anisaldehyde solutions by heating on a hot plate. Specified products were purified by flash column chromatography using silica gel 60 (230-400 mesh, Merck). IR absorptions on NaCl plates were run on a FT-IR 1600 spectrometer. <sup>1</sup>H-NMR spectral data were obtained using 400, and 500 MHz instruments. <sup>13</sup>C NMR spectral data were obtained using a 100, 125 MHz spectrometer. For all NMR spectra,  $\delta$  values are given in ppm and *J* values in Hz.

## Experimental Procedures

### General Procedure (A).

To a stirred solution of carboxylic acid (1 equiv) in (0.2-0.3M) CH<sub>3</sub>CN:H<sub>2</sub>O (95:5) was added oxyma (1.5 equiv), EDCI (1.5 equiv), alcohol (2 equiv) followed by NaHCO<sub>3</sub> (6 equiv). The reaction mixture was stirred at rt. Upon completion, all volatiles were evaporated *in vacuo*, and the crude material was dissolved in EtOAc. The crude material was washed with aq. NaHCO<sub>3</sub> (3x). The combined organic extracts were dried over Na<sub>2</sub>SO<sub>4</sub> and concentrated *in vacuo*. The crude material was purified by silica gel column chromatography (Hexanes:EtOAc 75:25) to give the desired ester.

### General Procedure (B).

To a stirred solution of alcohol (1 equiv) in (0.2-0.3M) CH<sub>3</sub>CN:H<sub>2</sub>O (95:5) was added oxyma (3 equiv), EDCI (3 equiv), carboxylic acid (2 equiv) followed by NaHCO<sub>3</sub> (10 equiv). The reaction mixture was stirred at rt. Upon completion, all volatiles were evaporated *in vacuo*, and the crude material was dissolved in EtOAc. The crude material was washed with aq. NaHCO<sub>3</sub> (3x). The combined organic extracts were dried over Na<sub>2</sub>SO<sub>4</sub> and concentrated *in vacuo*. The crude material was purified by silica gel column chromatography (Hexanes:EtOAc 75:25) to give the desired ester.

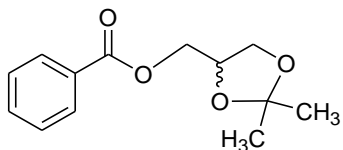

**(2,2-dimethyl-1,3-dioxolan-4-yl)methyl benzoate (30a).** General Procedure B; Yield: 95%; white solid; TLC (Hexanes:EtOAc 75:25): R<sub>f</sub> = 0.75; IR (thin film)  $\nu_{\max}$  = 3453, 1723, 1440, 1215, 1175, 1036, 1054 cm<sup>-1</sup>; <sup>1</sup>H NMR (CDCl<sub>3</sub>, 500 MHz)  $\delta$  8.07 (d, *J* = 8.5 Hz, 2H), 7.57 (m, 1H), 7.46 (m, 2H), 4.47 (m, 1H), 4.42 (m, 2H), 4.17 (m, 1H), 3.89 (m, 1H), 1.48 (s, 3H), 1.41 (s, 3H); <sup>13</sup>C NMR (CDCl<sub>3</sub>, 125 MHz)  $\delta$  166.4, 133.2, 129.8, 129.7, 128.4, 109.9, 73.7, 66.4, 65.0, 26.8, 25.4; HRMS (ESI<sup>+</sup>): *m/z* calcd for C<sub>13</sub>H<sub>16</sub>O<sub>4</sub>, 236.1049; found 236.1052. Melting Point = 39-40 °C.

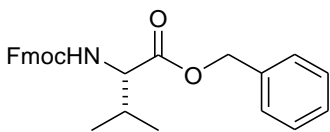

**(S)-benzyl 2-(((9H-fluoren-9-yl)methoxy)carbonyl)amino)-3-methylbutanoate (25).** General Procedure A; Yield: 96%; white foam; TLC (Hexanes:EtOAc 75:25): R<sub>f</sub> = 0.65; [ $\alpha$ ]<sub>D</sub><sup>22</sup> -3.16 (*c* = 0.3, CHCl<sub>3</sub>); IR (thin film)  $\nu_{\max}$  = 3351, 2963, 1724, 1613, 1516 cm<sup>-1</sup>; <sup>1</sup>H NMR (CDCl<sub>3</sub>, 500 MHz)  $\delta$  7.79 (d, *J* = 7.5 Hz, 2H), 7.63 (d, *J* = 7.5 Hz, 2H), 7.38 (m, 9H), 5.36 (d, *J* = 9.0 Hz, 1H), 5.23 (m, 2H), 4.39 (m, 3H), 4.25 (m, 1H), 2.22 (m, 1H),

0.98 (m, 3H), 0.90 (m, 3H);  $^{13}\text{C}$  NMR ( $\text{CDCl}_3$ , 125 MHz)  $\delta$  171.9, 156.2, 143.9, 143.8, 141.3, 135.3, 128.6, 128.5, 128.4, 127.7, 127.1, 125.1, 119.9, 67.1, 58.9, 47.2, 31.4, 19.0, 17.5; HRMS ( $\text{ESI}^+$ ):  $m/z$  calcd for  $\text{C}_{27}\text{H}_{27}\text{NO}_4$ , 429.1940; found 429.1942.

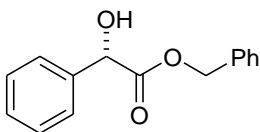

**(S)-benzyl 2-hydroxy-2-phenylacetate (27).** General Procedure A; Yield: 98%; white solid; TLC (Hexanes:EtOAc 75:25):  $R_f = 0.50$ ;  $[\alpha]_D^{22} -53.7$  ( $c = 1$ ,  $\text{CHCl}_3$ ); IR (thin film)  $\nu_{\text{max}} = 3447$  (br), 1727, 1445, 1210, 1180, 1096, 1066, 710  $\text{cm}^{-1}$ ;  $^1\text{H}$  NMR ( $\text{CDCl}_3$ , 500 MHz)  $\delta$  7.45-7.33 (m, 8H), 7.22 (m, 2H), 5.26 (d,  $J = 12.5$  Hz, 1H), 3.45 (d,  $J = 6.0$  Hz, 1H);  $^{13}\text{C}$  NMR ( $\text{CDCl}_3$ , 125 MHz)  $\delta$  173.6, 138.2, 134.9, 128.6, 128.5, 128.4, 128.3, 128.0, 126.6, 72.9, 67.7; HRMS ( $\text{ESI}^+$ ):  $m/z$  calcd for  $\text{C}_{15}\text{H}_{14}\text{O}_3$ , 242.0943; found 242.0943. Melting Point = 92-93  $^\circ\text{C}$ .

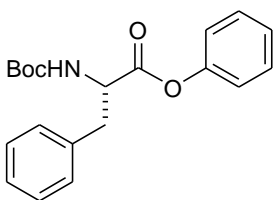

**(S)-phenyl 2-((tert-butoxycarbonyl)amino)-3-phenylpropanoate (23e).** General Procedure A; Yield: 95%; colorless liquid; TLC (Hexanes:EtOAc 75:25):  $R_f = 0.80$ ;  $[\alpha]_D^{22} -2.5$  ( $c = 0.3$ ,  $\text{CHCl}_3$ ); IR (thin film)  $\nu_{\text{max}} = 3361$ , 1735, 1703, 1506, 1366, 1220, 1174  $\text{cm}^{-1}$ ;  $^1\text{H}$  NMR ( $\text{CDCl}_3$ , 500 MHz)  $\delta$  7.39-7.24 (m, 8H), 7.02-7.00 (m, 2H), 5.08 (d,  $J = 6.5$  Hz, 1H), 4.84 (d,  $J = 7.0$  Hz, 1H), 3.26 (d,  $J = 5.0$  Hz, 1H), 1.47 (s, 9H);  $^{13}\text{C}$  NMR ( $\text{CDCl}_3$ , 125 MHz)  $\delta$  170.6, 155.2, 150.4, 135.8, 129.5, 128.8, 127.3, 126.1, 121.3, 80.2, 54.7, 38.4, 28.4; HRMS ( $\text{ESI}^+$ ):  $m/z$  calcd for  $\text{C}_{20}\text{H}_{23}\text{NO}_4$ , 341.1627; found 341.1627.

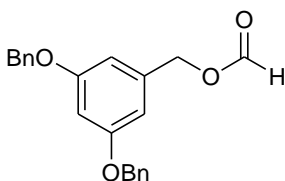

**3,5-bis(benzyloxy)benzyl formate (31).** General Procedure B; Yield: 95%; colorless liquid; TLC (Hexanes:EtOAc 75:25):  $R_f = 0.70$ ; IR (thin film)  $\nu_{\text{max}} = 3309$ , 3234, 1888, 1786, 1776, 1548, 1494, 1468, 1294, 855  $\text{cm}^{-1}$ ;  $^1\text{H}$  NMR ( $\text{CDCl}_3$ , 500 MHz)  $\delta$  8.17 (s, 1H, ), 7.45-7.36 (m, 10H), 6.62 (m, 3H), 5.16 (s, 2H), 5.06 (s, 4H);  $^{13}\text{C}$  NMR ( $\text{CDCl}_3$ , 125 MHz)  $\delta$  160.8, 160.2, 137.5, 136.7, 128.7, 128.5, 128.1, 127.6, 107.2, 102.1, 70.2, 65.6; HRMS ( $\text{ESI}^+$ ):  $m/z$  calcd for  $\text{C}_{22}\text{H}_{20}\text{O}_4$ , 348.1362; found 348.1363.

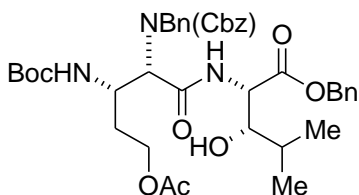

**(2S,3S)-benzyl 2-((2S,3S)-5-acetoxy-2-(benzyl((benzyloxy)carbonyl)amino)-3-((tert-butoxycarbonyl)amino)pentanamido)-3-hydroxy-4-methylpentanoate (3a).** General Procedure A; Yield: 95%; colorless liquid; TLC (Hexanes:EtOAc 50:50):  $R_f = 0.50$ ;  $[\alpha]_D^{22} +0.6$  ( $c = 0.8$ ,  $\text{CHCl}_3$ ); IR (thin film)  $\nu_{\text{max}} = 3350$  (br), 3015, 2975, 2962, 1728, 1510, 1464, 1412, 1182, 1109, 1063, 1035, 769, 735, 687  $\text{cm}^{-1}$ ;  $^1\text{H NMR}$  ( $\text{CDCl}_3$ , 500 MHz)  $\delta$  7.18-7.48 (m, 15H), 6.62 (s, 1H), 5.16-5.26 (m, 6H), 4.64-4.61 (m, 2H), 4.41-4.49 (m, 3H), 4.11 (s, 3H), 3.84-3.88 (m, 1H), 3.53-3.57 (m, 1H), 2.19 (s, 1H), 2.08 (s, 3H), 1.69 (m, 1H), 1.39 (s, 9H), 0.89-1.03 (m, 6H);  $^{13}\text{C NMR}$  ( $\text{CDCl}_3$ , 125 MHz)  $\delta$  172.7, 171.1, 168.4, 155.5, 137.7, 135.9, 128.5, 128.4, 128.2, 128.1, 127.9, 127.8, 127.6, 79.5, 68.1, 64.1, 61.3, 52.2, 20.7, 47.3, 41.8, 41.3, 30.8, 29.7, 28.3, 24.9, 22.8, 22.7, 21.9, 21.8, 20.9, 14.19; HRMS ( $\text{ESI}^+$ ):  $m/z$  calcd for  $\text{C}_{40}\text{H}_{51}\text{N}_3\text{O}_{10}$ , 733.3574; found 733.3574.

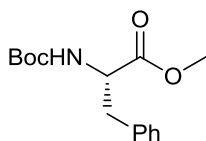

**2-tert-Butoxycarbonylamino-3-phenyl-propionic acid methyl ester (11a).** General Procedure A; Yield: 96%; colorless liquid; TLC (Hexanes:EtOAc 70:30):  $R_f = 0.75$ ;  $[\alpha]_D^{22} -20.1$  ( $c = 0.9$ ,  $\text{CHCl}_3$ ); IR (thin film)  $\nu_{\text{max}} = 3384$ , 1944, 1840, 1677, 1355, 877  $\text{cm}^{-1}$ ;  $^1\text{H NMR}$  ( $\text{CDCl}_3$ , 500 MHz)  $\delta$  7.31 (m, 3H), 7.14 (d,  $J = 6.5$  Hz, 2H), 4.97 (bs, 1H), 4.61 (d,  $J = 5.5$  Hz, 1H), 3.72 (s, 3H), 3.10 (m, 2H), 1.43 (s, 9H);  $^{13}\text{C NMR}$  ( $\text{CDCl}_3$ , 100 MHz)  $\delta$  172.4, 155.1, 136.0, 129.3, 128.6, 127.0, 79.9, 54.4, 52.2, 38.4, 28.3; HRMS ( $\text{ESI}^+$ ):  $m/z$  calcd for  $\text{C}_{15}\text{H}_{21}\text{NO}_4$ , 279.1471; found 279.1476.

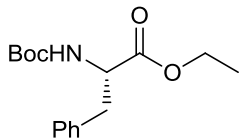

**2-tert-Butoxycarbonylamino-3-phenyl-propionic acid ethyl ester (23a).** General Procedure A; Yield: 95%; colorless liquid; TLC (Hexanes:EtOAc 70:30):  $R_f = 0.75$ ;  $[\alpha]_D^{22} -12.5$  ( $c = 0.9$ ,  $\text{CHCl}_3$ ); IR (thin film)  $\nu_{\text{max}} = 3394$ , 1949, 1843, 1676, 1345, 879  $\text{cm}^{-1}$ ;  $^1\text{H NMR}$  ( $\text{CDCl}_3$ , 400 MHz)  $\delta$  7.27 (m, 3H), 7.13 (d,  $J = 6.8$  Hz, 2H), 4.97 (d,  $J = 7.2$  Hz, 1H), 4.56 (q, 1H), 4.15 (q, 2H), 3.08 (m, 2H), 1.42 (s, 9H);  $^{13}\text{C NMR}$  ( $\text{CDCl}_3$ , 100 MHz)  $\delta$  171.9, 155.1, 136.1, 129.4, 128.5, 127.0, 79.9, 61.4, 54.5, 38.3, 14.1; HRMS ( $\text{ESI}^+$ ):  $m/z$  calcd for  $\text{C}_{16}\text{H}_{23}\text{NO}_4$ , 293.1627; found 293.1622.

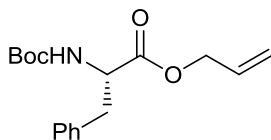

**2-tert-Butoxycarbonylamino-3-phenyl-propionic acid allyl ester (23c).** General Procedure A; Yield: 98%; colorless liquid; TLC (Hexanes:EtOAc 70:30):  $R_f = 0.70$ ;  $[\alpha]_D^{22} -10.1$  ( $c = 1.7$ ,  $\text{CHCl}_3$ ); IR (thin film)  $\nu_{\text{max}} = 3384, 1939, 1833, 1677, 1508, 1348, 1333, 877 \text{ cm}^{-1}$ ;  $^1\text{H NMR}$  ( $\text{CDCl}_3$ , 400 MHz)  $\delta$  7.27 (m, 3H), 7.13 (d,  $J = 7.2$  Hz, 2H), 5.86 (m, 1H), 5.26 (dd, 2H), 4.96 (d,  $J = 7.2$  Hz, 1H), 4.60 (d,  $J = 6.0$  Hz, 1H), 3.09 (m, 2H), 1.41 (s, 9H);  $^{13}\text{C NMR}$  ( $\text{CDCl}_3$ , 100 MHz)  $\delta$  171.6, 155.1, 136.0, 131.5, 129.4, 128.5, 127.0, 118.9, 79.9, 65.9, 54.5, 38.4, 28.3; HRMS ( $\text{ESI}^+$ ):  $m/z$  calcd for  $\text{C}_{17}\text{H}_{23}\text{NO}_4$ , 305.1627; found 305.1621.

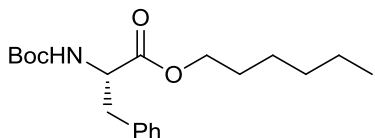

**2-tert-Butoxycarbonylamino-3-phenyl-propionic acid hexyl ester (23b).** General Procedure A; Yield: 97%; colorless liquid; TLC (Hexanes:EtOAc 70:30):  $R_f = 0.85$ ;  $[\alpha]_D^{22} -20.6$  ( $c = 0.8$ ,  $\text{CHCl}_3$ ); IR (thin film)  $\nu_{\text{max}} = 3280, 1938, 1842, 1679, 1510, 1349, 877 \text{ cm}^{-1}$ ;  $^1\text{H NMR}$  ( $\text{CDCl}_3$ , 400 MHz)  $\delta$  7.20 (m, 3H), 7.06 (d,  $J = 6.8$  Hz, 2H), 4.91 (d,  $J = 8.0$  Hz, 1H), 4.50 (q, 1H), 4.01 (m, 2H), 3.01 (m, 2H), 1.52 (m, 2H), 1.35 (s, 9H), 1.21 (m, 6H), 0.82 (t,  $J = 7.2$  Hz, 3H);  $^{13}\text{C NMR}$  ( $\text{CDCl}_3$ , 100 MHz)  $\delta$  172.0, 155.1, 136.1, 129.4, 128.5, 127.0, 79.8, 65.5, 54.5, 38.5, 31.4, 28.4, 22.5, 14.0; HRMS ( $\text{ESI}^+$ ):  $m/z$  calcd for  $\text{C}_{20}\text{H}_{31}\text{NO}_4$ , 349.2253; found 349.2259.

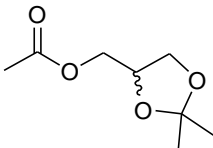

**Acetic acid 2,2-dimethyl-[1,3]dioxolan-4-ylmethyl ester (30b).** General Procedure B; Yield: 99%; colorless liquid; TLC (Hexanes:EtOAc 70:30):  $R_f = 0.70$ ; IR (thin film)  $\nu_{\text{max}} = 1945, 1376, 1189 \text{ cm}^{-1}$ ;  $^1\text{H NMR}$  ( $\text{CDCl}_3$ , 400 MHz)  $\delta$  4.30 (m, 1H), 4.15 (dd,  $J = 4.4$  Hz, 1H), 4.06 (m, 2H), 3.71 (dd,  $J = 6.0$  Hz, 1H), 2.07 (s, 3H), 1.41 (s, 3H), 1.35 (s, 3H);  $^{13}\text{C NMR}$  ( $\text{CDCl}_3$ , 100 MHz)  $\delta$  170.8, 109.9, 73.6, 66.3, 64.9, 26.7, 25.4, 20.9; HRMS ( $\text{ESI}^+$ ):  $m/z$  calcd for  $\text{C}_8\text{H}_{14}\text{O}_4$ , 174.0892; found 174.0889.

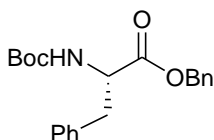

**2-tert-Butoxycarbonylamino-3-phenyl-propionic acid benzyl ester (23d).** General Procedure A; Yield: 99%; amorphous solid; TLC (Hexanes:EtOAc 70:30):  $R_f = 0.70$ ;  $[\alpha]_D^{22} -28.6$  ( $c = 1.4$ ,  $\text{CHCl}_3$ ); IR (thin film)  $\nu_{\text{max}} = 3370, 1918, 1832, 1681, 1351, 1340, 887 \text{ cm}^{-1}$ ;  $^1\text{H NMR}$  ( $\text{CDCl}_3$ , 500 MHz)  $\delta$  7.3 (bs, 3H), 7.31 (m, 2H), 7.24 (bs, 3H), 7.06 (bs, 2H), 5.15 (q, 2H), 4.98 (bs, 1H), 4.64 (d,  $J = 5.5$  Hz, 1H), 3.10 1.43 (s, 9H);  $^{13}\text{C NMR}$  ( $\text{CDCl}_3$ , 100 MHz)  $\delta$  171.9, 155.3, 136.1, 135.4, 129.6, 128.8, 127.2, 80.1, 67.3,

54.6, 54.6, 38.5, 28.5; HRMS (ESI<sup>+</sup>): *m/z* calcd for C<sub>21</sub>H<sub>25</sub>NO<sub>4</sub>, 355.1784; found 355.1788.

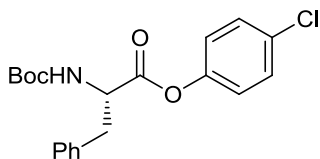

**2-tert-Butoxycarbonylamino-3-phenyl-propionic acid 4-chloro-phenyl ester (23f).** General Procedure A; Yield: 95%; amorphous solid; TLC (Hexanes:EtOAc 70:30): R<sub>f</sub> = 0.65; [α]<sub>D</sub><sup>22</sup> -30.9 (*c* = 0.8, CHCl<sub>3</sub>); IR (thin film) ν<sub>max</sub> = 3381, 1945, 1845, 1672, 1510, 1390, 1350, 870 cm<sup>-1</sup>; <sup>1</sup>H NMR (CDCl<sub>3</sub>, 500 MHz) δ 7.34 (m, 5H), 7.24 (d, *J* = 6.5 Hz, 2H), 6.93 (m, 2H), 5.05 (bs, 1H), 4.81 (bs, 1H), 3.23 (m, 2H), 1.46 (s, 9H); <sup>13</sup>C NMR (CDCl<sub>3</sub>, 100 MHz) δ 170.5, 155.1, 148.8, 135.6, 131.5, 129.5, 128.8, 127.4, 122.7, 80.3, 54.7, 38.3, 28.3; HRMS (ESI<sup>+</sup>): *m/z* calcd for C<sub>20</sub>H<sub>22</sub>ClNO<sub>4</sub>, 375.1237; found 375.1233.

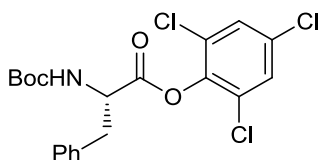

**2-tert-Butoxycarbonylamino-3-phenyl-propionic acid 2,4,6-trichloro-phenyl ester (23g).** General Procedure A; Yield: 90%; amorphous solid; TLC (Hexanes:EtOAc 70:30): R<sub>f</sub> = 0.65; [α]<sub>D</sub><sup>22</sup> -25.9 (*c* = 0.9, CHCl<sub>3</sub>); IR (thin film) ν<sub>max</sub> = 3371, 2008, 1843, 1675, 1610, 1516, 1392, 1352, 1148, 1083, 686 cm<sup>-1</sup>; <sup>1</sup>H NMR (CDCl<sub>3</sub>, 400 MHz) δ 7.39 (s, 2H), 7.30 (m, 5H), 4.95 (bs, 2H), 3.43 (m, 1H), 3.15 (m, 1H), 1.40 (s, 9H); <sup>13</sup>C NMR (CDCl<sub>3</sub>, 100 MHz) δ 168.8, 155.0, 142.6, 135.6, 132.4, 129.5, 128.7, 128.1, 127.2, 80.3, 54.3, 38.0, 28.3; HRMS (ESI<sup>+</sup>): *m/z* calcd for C<sub>20</sub>H<sub>20</sub>Cl<sub>3</sub>NO<sub>4</sub>, 443.0458; found 443.0452.

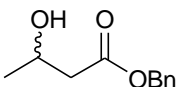

**3-Hydroxybutyric acid benzyl ester (28).** General Procedure A; Yield: 99%; Amorphous solid; TLC (Hexanes:EtOAc 70:30): R<sub>f</sub> = 0.45; IR (thin film) ν<sub>max</sub> = 3283, 1955, 1440, 1377, 1301, 311 cm<sup>-1</sup>; <sup>1</sup>H NMR (CDCl<sub>3</sub>, 400 MHz) δ 7.36 (m, 5H), 5.16 (s, 2H), 4.22 (m, 1H), 2.94 (s, 1H), 2.51 (m, 2H), 1.23 (d, *J* = 6.0 Hz, 3H); <sup>13</sup>C NMR (CDCl<sub>3</sub>, 100 MHz) δ 172.8, 135.6, 128.7, 128.3, 66.6, 64.3, 42.9, 22.5; HRMS (ESI<sup>+</sup>): *m/z* calcd for C<sub>11</sub>H<sub>14</sub>O<sub>3</sub>, 194.0943; found 194.0950.

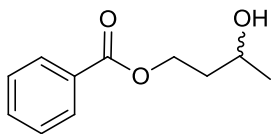

**Benzoic acid 3-hydroxy-butyl ester (32).** General Procedure B; Yield: 80%; amorphous solid; TLC (Hexanes:EtOAc 70:30): R<sub>f</sub> = 0.45; IR (thin film) ν<sub>max</sub> = 3299, 1910, 1453, 1400, 1244, 819, 321 cm<sup>-1</sup>; <sup>1</sup>H NMR (CDCl<sub>3</sub>, 500 MHz) δ 8.04 (d, *J* = 7.5 Hz, 2H), 7.57

(m, 1H), 7.45 (m, 2H), 4.62 (m, 1H), 4.39 (m, 1H), 3.98 (m, 1H), 2.05 (bs, 1H), 1.97 (m, 1H), 1.86 (m, 1H), 1.27 (d,  $J = 6.0$  Hz, 3H);  $^{13}\text{C}$  NMR ( $\text{CDCl}_3$ , 100 MHz)  $\delta$  167.0, 133.1, 130.1, 129.6, 128.4, 64.9, 62.2, 38.3, 23.5; HRMS ( $\text{ESI}^+$ ):  $m/z$  calcd for  $\text{C}_{11}\text{H}_{14}\text{O}_3$ , 194.0943; found 194.0949.

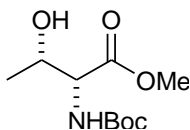

**2-tert-Butoxycarbonylamino-3-hydroxybutyric acid methyl ester (29).** General Procedure A; Yield: 95%; amorphous solid; TLC (Hexanes:EtOAc 70:30):  $R_f = 0.45$ ;  $[\alpha]_D^{22}$  20.9 ( $c = 0.8$ ,  $\text{CHCl}_3$ ); IR (thin film)  $\nu_{\text{max}} = 3301, 1905, 1450, 1403, 1250, 811$   $\text{cm}^{-1}$ ;  $^1\text{H}$  NMR ( $\text{CDCl}_3$ , 400 MHz)  $\delta$  5.36 (d,  $J = 8.0$  Hz, 1H), 4.27 (m, 2H), 3.76 (s, 3H), 2.37 (bs, 1H), 1.44 (s, 9H), 1.23 (d,  $J = 6.4$  Hz, 3H);  $^{13}\text{C}$  NMR ( $\text{CDCl}_3$ , 100 MHz)  $\delta$  172.0, 156.2, 80.1, 68.1, 58.7, 52.5, 28.3, 19.9; HRMS ( $\text{ESI}^+$ ):  $m/z$  calcd for  $\text{C}_{10}\text{H}_{19}\text{NO}_5$ , 233.1263; found 233.1268.

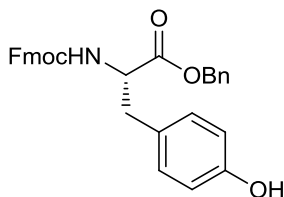

**2-(9H-Fluoren-9-ylmethoxycarbonylamino)-3-(4-hydroxyphenyl)propionic acid benzyl ester (24).** General Procedure A, except 8 equiv. Of BnOH used; Yield: 95%; amorphous solid; TLC (Hexanes:EtOAc 70:30):  $R_f = 0.40$ ;  $[\alpha]_D^{22}$  -29.9 ( $c = 1.0$ ,  $\text{CHCl}_3$ ); IR (thin film)  $\nu_{\text{max}} = 3801, 3377, 1915, 1866, 1670, 1433, 1377, 1312, 1220, 881$   $\text{cm}^{-1}$ ;  $^1\text{H}$  NMR ( $\text{CDCl}_3$ , 500 MHz)  $\delta$  7.76 (d,  $J = 7.5$  Hz, 2H), 7.55 (bs, 2H), 7.41-7.30 (m, 8H), 6.84 (d,  $J = 8.0$  Hz, 2H), 6.66 (d,  $J = 8.0$  Hz, 2H), 5.25 (d,  $J = 8.0$  Hz, 1H), 5.16 (q, 2H), 4.79 (bs, 1H), 4.67 (m, 1H), 4.43 (m, 1H), 4.35 (t,  $J = 8.5$  Hz, 1H), 4.20 (m, 1H), 3.04 (bs, 2H);  $^{13}\text{C}$  NMR ( $\text{CDCl}_3$ , 100 MHz)  $\delta$  171.6, 155.8, 154.9, 144.1, 141.5, 135.3, 130.8, 128.9, 127.8, 127.3, 125.3, 120.2, 115.7, 67.5, 67.2, 55.1, 47.4, 37.6; HRMS ( $\text{ESI}^+$ ):  $m/z$  calcd for  $\text{C}_{31}\text{H}_{27}\text{NO}_5$ , 493.1889; found 493.1892.

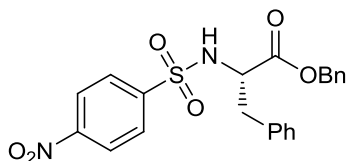

**2-(4-Nitro-benzenesulfonylamino)-3-phenylpropionic acid benzyl ester (26).** General Procedure A; Yield: 98%; amorphous solid; TLC (Hexanes:EtOAc 70:30):  $R_f = 0.55$ ;  $[\alpha]_D^{22}$  -26.8 ( $c = 1.0$ ,  $\text{CHCl}_3$ ); IR (thin film)  $\nu_{\text{max}} = 3733, 3367, 1921, 1866, 1603, 1433, 1357, 1270, 801$   $\text{cm}^{-1}$ ;  $^1\text{H}$  NMR ( $\text{CDCl}_3$ , 500 MHz)  $\delta$  8.12 (d,  $J = 8.5$  Hz, 2H), 7.80 (d,  $J = 9.0$  Hz, 2H), 7.35 (m, 3H), 7.18 (m, 5H), 7.01 (d,  $J = 6.5$  Hz, 2H), 5.19 (d,  $J = 9.0$  Hz, 1H), 4.97 (q, 2H), 4.30 (m, 1H), 3.13-3.06 (ddd, 2H);  $^{13}\text{C}$  NMR ( $\text{CDCl}_3$ , 125 MHz)  $\delta$



170.4, 149.9, 145.4, 134.6, 134.4, 129.4, 128.9, 128.8, 128.7, 128.2, 127.5, 124.1, 67.8, 57.0, 39.3; HRMS (ESI<sup>+</sup>): *m/z* calcd for C<sub>22</sub>H<sub>20</sub>N<sub>2</sub>O<sub>6</sub>S, 440.1042; found 440.1046.

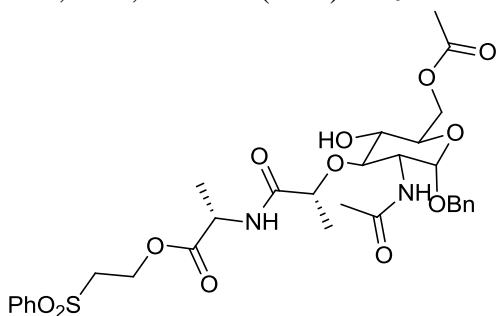

**2-[2-(2-Acetoxyethyl-5-acetylamino-6-benzyloxy-3-hydroxy-tetrahydro-pyran-4-yloxy)-propionylamino]-propionic acid 2-benzenesulfonyl-ethyl ester (36a).** General Procedure A; Yield: 95%; amorphous solid; TLC (Hexanes:EtOAc 70:30): *R<sub>f</sub>* = 0.50; [ $\alpha$ ]<sub>D</sub><sup>22</sup> + 125 (*c* = 1.1, CHCl<sub>3</sub>); IR (thin film)  $\nu_{\max}$  = 3798, 3267, 3211, 1941, 1909, 1876, 1683, 1655, 1470, 1397, 1375, 1274, 721 cm<sup>-1</sup>; <sup>1</sup>H NMR (CDCl<sub>3</sub>, 500 MHz)  $\delta$  8.08 (d, *J* = 7.0 Hz, 2H), 7.90 (d, *J* = 6.5 Hz, 2H), 7.67 (m, 1H), 7.60-7.56 (m, 3H), 7.46 (m, 2H), 7.39-7.32 (m, 5H), 6.95 (d, *J* = 5.5 Hz, 1H), 6.27 (dd, 1H), 4.97 (s, 1H), 4.72 (m, 2H), 4.52-4.39 (m, 4H), 4.28-4.10 (m, 4H), 3.93 (bs, 1H), 3.60 (m, 2H), 3.44 (bs, 1H), 3.38 (m, 2H), 1.93 (d, *J* = 3.0 Hz, 3H), 1.42 (dd, 3H), 1.32 (dd, 3H); <sup>13</sup>C NMR (CDCl<sub>3</sub>, 125 MHz)  $\delta$  172.8, 171.9, 170.4, 139.1, 136.9, 134.2, 129.5, 128.7, 128.3, 128.1, 97.2, 80.0, 77.9, 70.5, 58.0, 54.9, 52.6, 47.9, 23.4, 20.9, 19.0, 17.2; HRMS (ESI<sup>+</sup>): *m/z* calcd for C<sub>31</sub>H<sub>40</sub>N<sub>2</sub>O<sub>12</sub>S, 664.2302; found 664.2305.

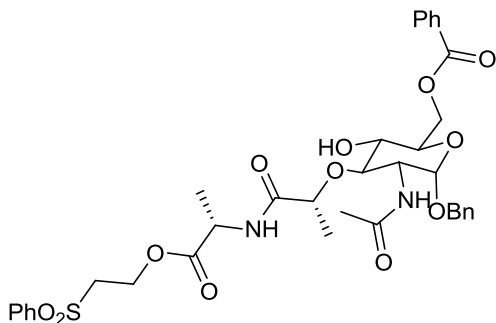

**Benzoic acid 5-acetylamino-4-{1-[1-(2-benzenesulfonyl-ethoxycarbonyl)-ethylcarbamoyl]-ethoxy}-6-benzyloxy-3-hydroxy-tetrahydro-pyran-2-ylmethyl ester (36b).** General Procedure A; Yield: 98%; amorphous solid; TLC (Hexanes:EtOAc 70:30): *R<sub>f</sub>* = 0.50; [ $\alpha$ ]<sub>D</sub><sup>22</sup> + 122 (*c* = 1.2, CHCl<sub>3</sub>); IR (thin film)  $\nu_{\max}$  = 3808, 3271, 3231, 1941, 1930, 1709, 1681, 1402, 1357, 1270, 1214, 818 cm<sup>-1</sup>; <sup>1</sup>H NMR (CDCl<sub>3</sub>, 500 MHz)  $\delta$  7.93 (d, *J* = 8.5 Hz, 2H), 7.70 (t, *J* = 7.0 Hz, 1H), 7.60 (t, *J* = 7.5 Hz, 2H), 7.39-7.32 (m, 5H), 6.92 (d, *J* = 7.0 Hz, 1H), 6.13 (d, *J* = 7.0 Hz, 1H), 4.95 (s, 1H), 4.70 (d, *J* = 12.0 Hz, 1H), 4.53-4.40 (m, 4H), 4.30-4.13 (m, 4H), 3.81 (d, *J* = 8.5 Hz, 1H), 3.58-3.50 (m, 2H), 3.47-3.36 (m, 2H), 3.14 (s, 1H), 2.15 (s, 3H), 1.93 (s, 3H), 1.43 (d, *J* = 6.5 Hz, 3H), 1.34 (d, *J* = 7.0 Hz, 3H); <sup>13</sup>C NMR (CDCl<sub>3</sub>, 125 MHz)  $\delta$  173.2, 171.9, 170.5, 166.8, 139.4, 137.1, 134.2, 132.8, 129.7, 128.9, 128.3, 128.1, 127.9, 127.5, 97.2, 80.2, 77.9, 70.5, 70.0, 63.5, 58.1, 54.9, 53.0, 47.9, 23.5, 19.0, 17.2; HRMS (ESI<sup>+</sup>): *m/z* calcd for C<sub>36</sub>H<sub>42</sub>N<sub>2</sub>O<sub>12</sub>S, 726.2458; found 726.2454.

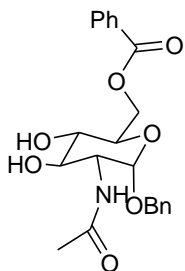

**Benzoic acid 5-acetylamino-6-benzyloxy-3,4-dihydroxy-tetrahydro-pyran-2-ylmethyl ester (34).** General Procedure B; Yield: 90%; amorphous solid; TLC (Hexanes:EtOAc 70:30):  $R_f = 0.30$ ;  $[\alpha]_D^{22} +210$  ( $c = 1.2$ ,  $\text{CHCl}_3$ ); IR (thin film)  $\nu_{\text{max}} = 3788, 3776, 3260, 1902, 1870, 1689, 1431, 1420, 1398, 1242, 1184, 819 \text{ cm}^{-1}$ ;  $^1\text{H NMR}$  ( $\text{CDCl}_3$ , 400 MHz)  $\delta$  8.06 (d,  $J = 7.2 \text{ Hz}$ , 2H), 7.56 (t,  $J = 7.2 \text{ Hz}$ , 1H), 7.44 (t,  $J = 7.6 \text{ Hz}$ , 2H), 7.34 (m, 5H), 5.84 (d,  $J = 8.4 \text{ Hz}$ , 1H), 4.92 (d,  $J = 4.0 \text{ Hz}$ , 4.74 (m, 2H), 4.49 (m, 2H), 4.11 (m, 1H), 3.91 (m, 1H), 3.76 (m, 1H), 3.55 (m, 1H), 3.43 (d,  $J = 3.5 \text{ Hz}$ , 1H), 1.99 (s, 3H);  $^{13}\text{C NMR}$  ( $\text{CDCl}_3$ , 125 MHz)  $\delta$  171.9, 167.1, 136.8, 133.4, 129.8, 128.7, 128.5, 128.4, 128.1, 96.7, 73.9, 71.2, 70.3, 69.8, 63.5, 53.6, 23.3; HRMS ( $\text{ESI}^+$ ):  $m/z$  calcd for  $\text{C}_{22}\text{H}_{25}\text{NO}_7$ , 415.1631; found 415.1635.

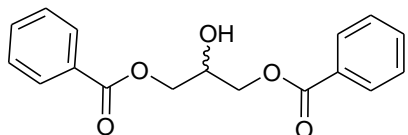

**Benzoic acid 3-hexanoyloxy-2-hydroxy-propyl ester (33a).** General Procedure B; Yield: 85%; amorphous solid; TLC (Hexanes:EtOAc 70:30):  $R_f = 0.55$ ; IR (thin film)  $\nu_{\text{max}} = 3693, 1915, 1400, 1387, 1231, 819 \text{ cm}^{-1}$ ;  $^1\text{H NMR}$  ( $\text{CDCl}_3$ , 400 MHz)  $\delta$  8.05 (d,  $J = 7.2 \text{ Hz}$ , 4H), 7.57 (t,  $J = 7.2 \text{ Hz}$ , 2H), 7.44 (t,  $J = 7.6 \text{ Hz}$ , 4H), 4.51 (m, 4H), 4.39 (m, 1H), 2.68 (d,  $J = 4.2 \text{ Hz}$ , 1H);  $^{13}\text{C NMR}$  ( $\text{CDCl}_3$ , 100 MHz)  $\delta$  166.7, 133.4, 129.5, 128.5, 68.7, 65.9; HRMS ( $\text{ESI}^+$ ):  $m/z$  calcd for  $\text{C}_{17}\text{H}_{16}\text{O}_5$ , 300.0998; found 300.0993.

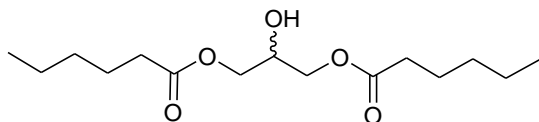

**Hexanoic acid 3-hexanoyloxy-2-hydroxy-propyl ester (33b).** General Procedure B; Yield: 90%; amorphous solid; TLC (Hexanes:EtOAc 70:30):  $R_f = 0.60$ ; IR (thin film)  $\nu_{\text{max}} = 3701, 1971, 1888, 1692, 1415, 1348, 1270, 654 \text{ cm}^{-1}$ ;  $^1\text{H NMR}$  ( $\text{CDCl}_3$ , 400 MHz)  $\delta$  4.17 (m, 4H), 4.07 (m, 1H), 2.41 (d,  $J = 4.2 \text{ Hz}$ , 1H), 2.33 (t,  $J = 7.6 \text{ Hz}$ , 4H), 1.62 (m, 4H), 1.30 (m, 8H), 0.88 (t,  $J = 6.8 \text{ Hz}$ , 6H);  $^{13}\text{C NMR}$  ( $\text{CDCl}_3$ , 100 MHz)  $\delta$  74.0, 68.4, 65.0, 34.1, 31.3, 24.6, 22.4, 13.9; HRMS ( $\text{ESI}^+$ ):  $m/z$  calcd for  $\text{C}_{17}\text{H}_{16}\text{O}_5$ , 300.0998; found 300.0993.

# NMR spectra

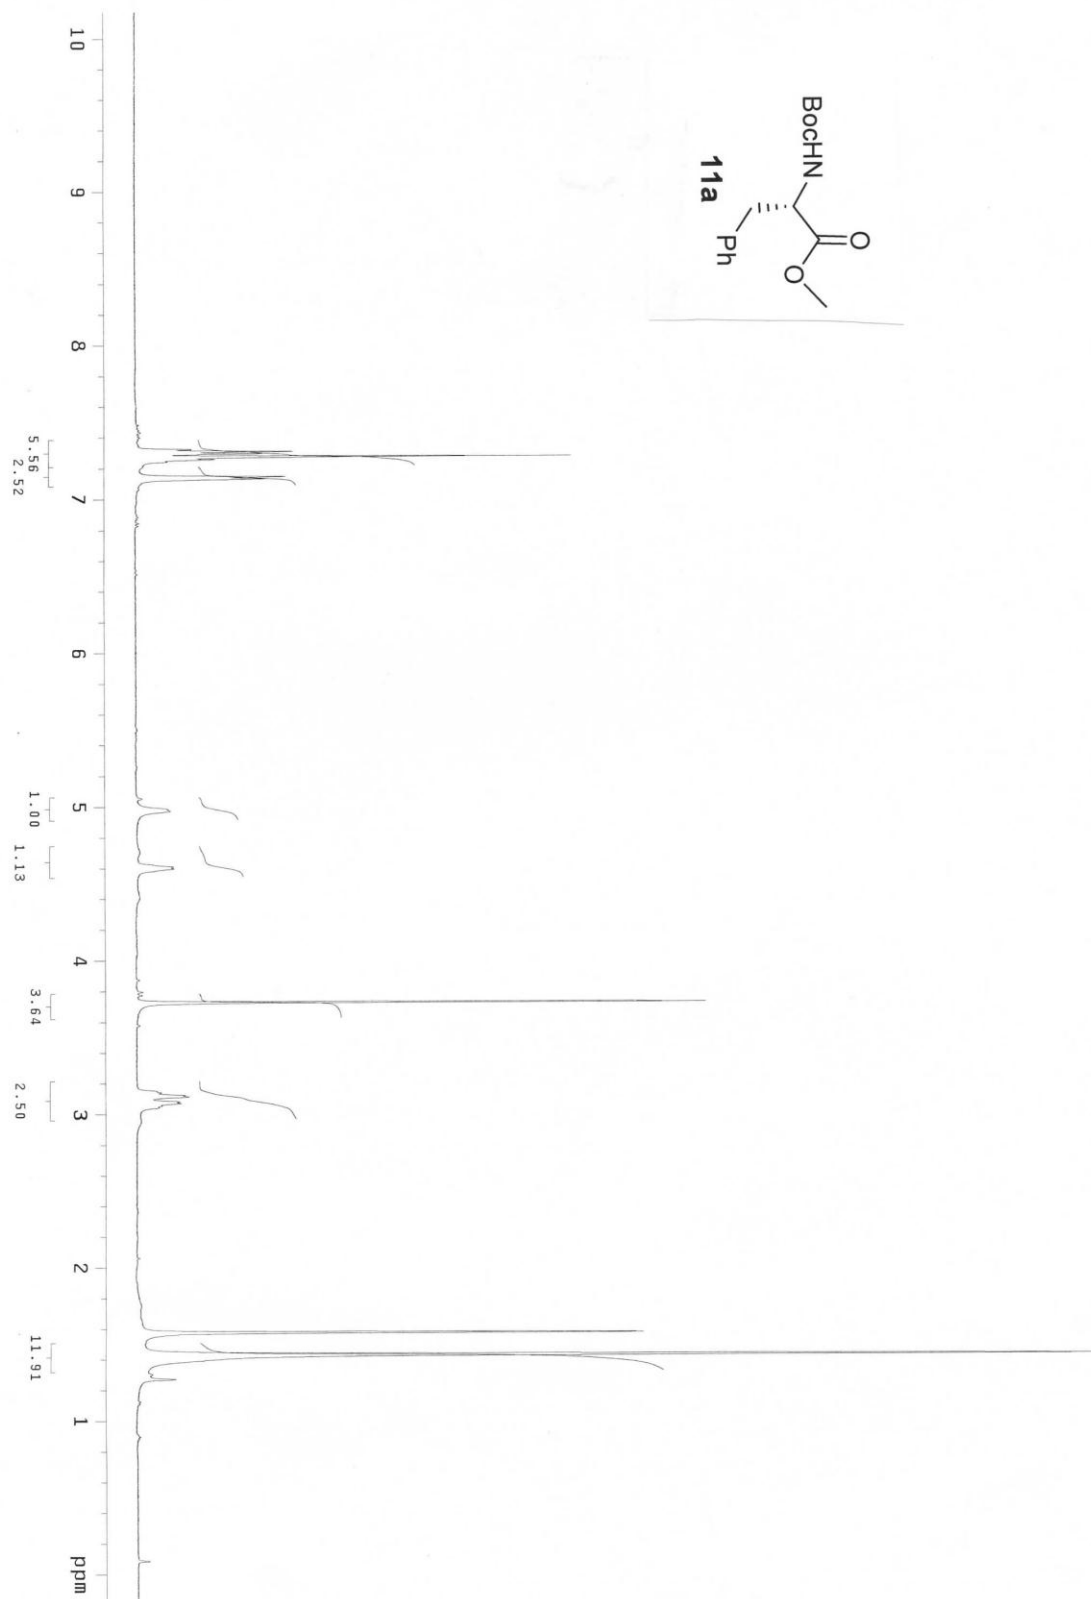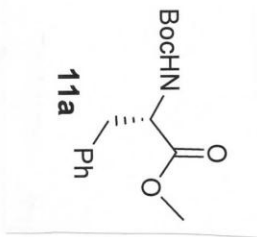

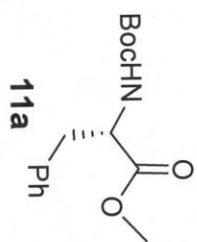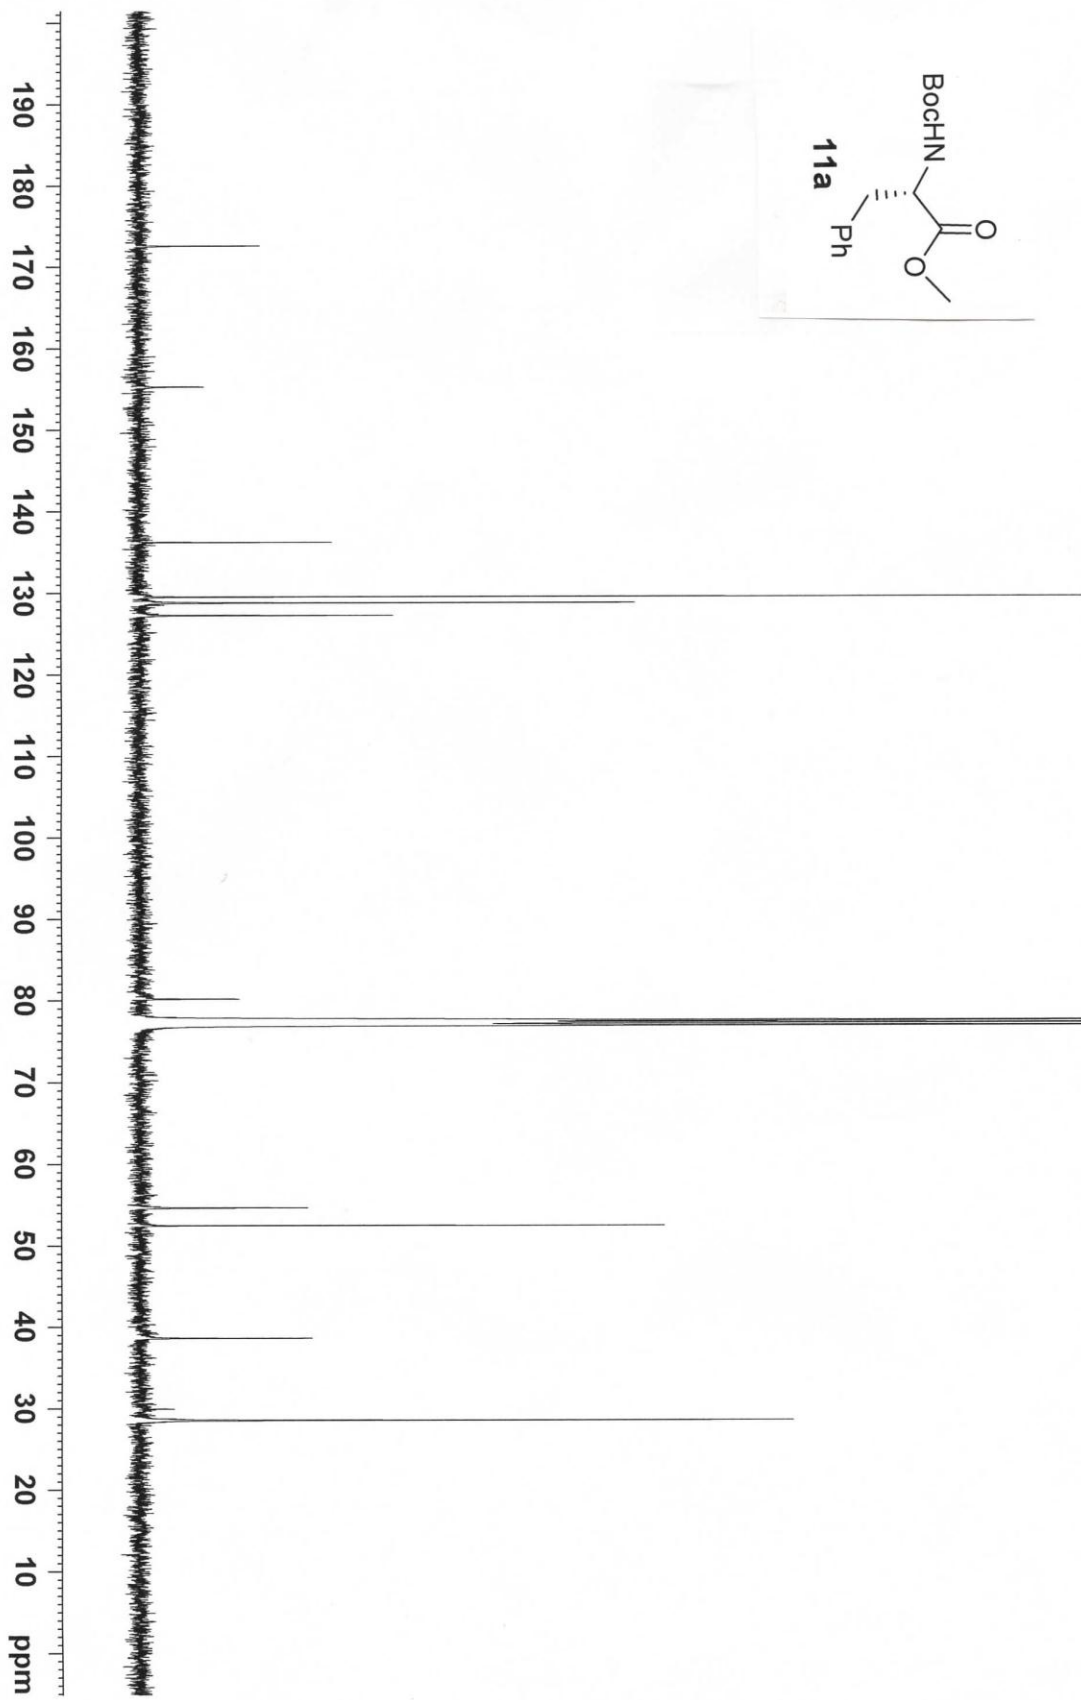

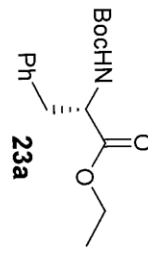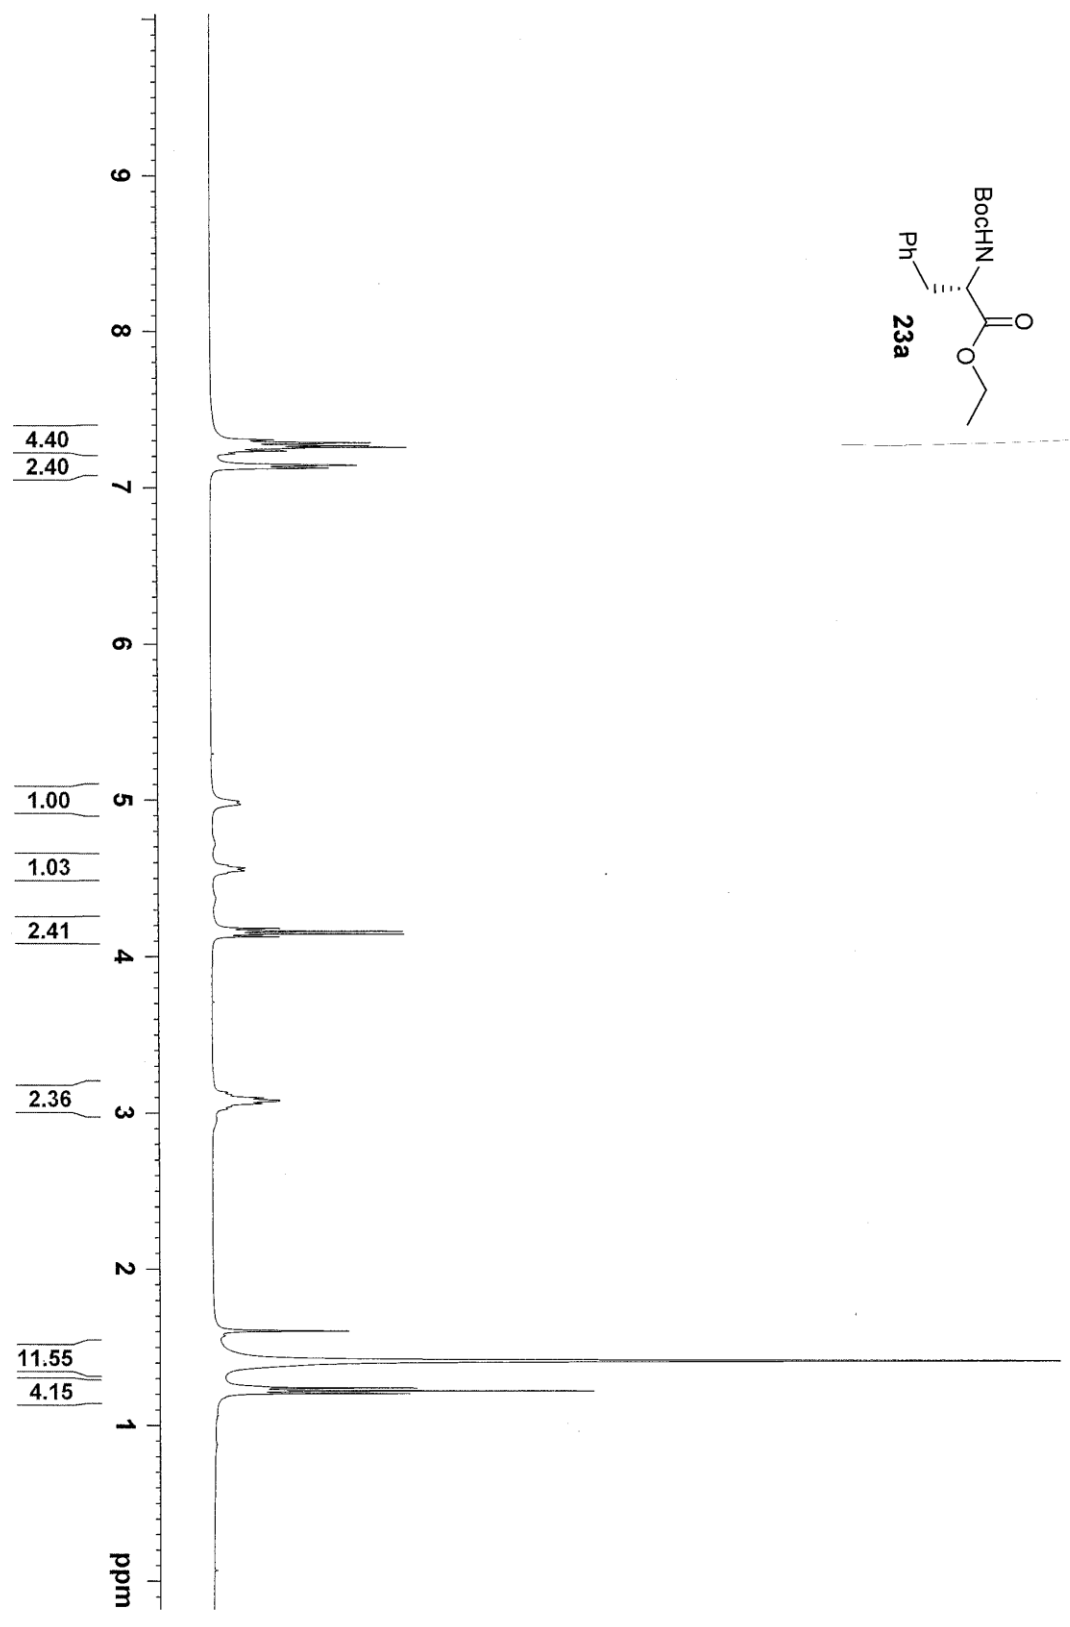

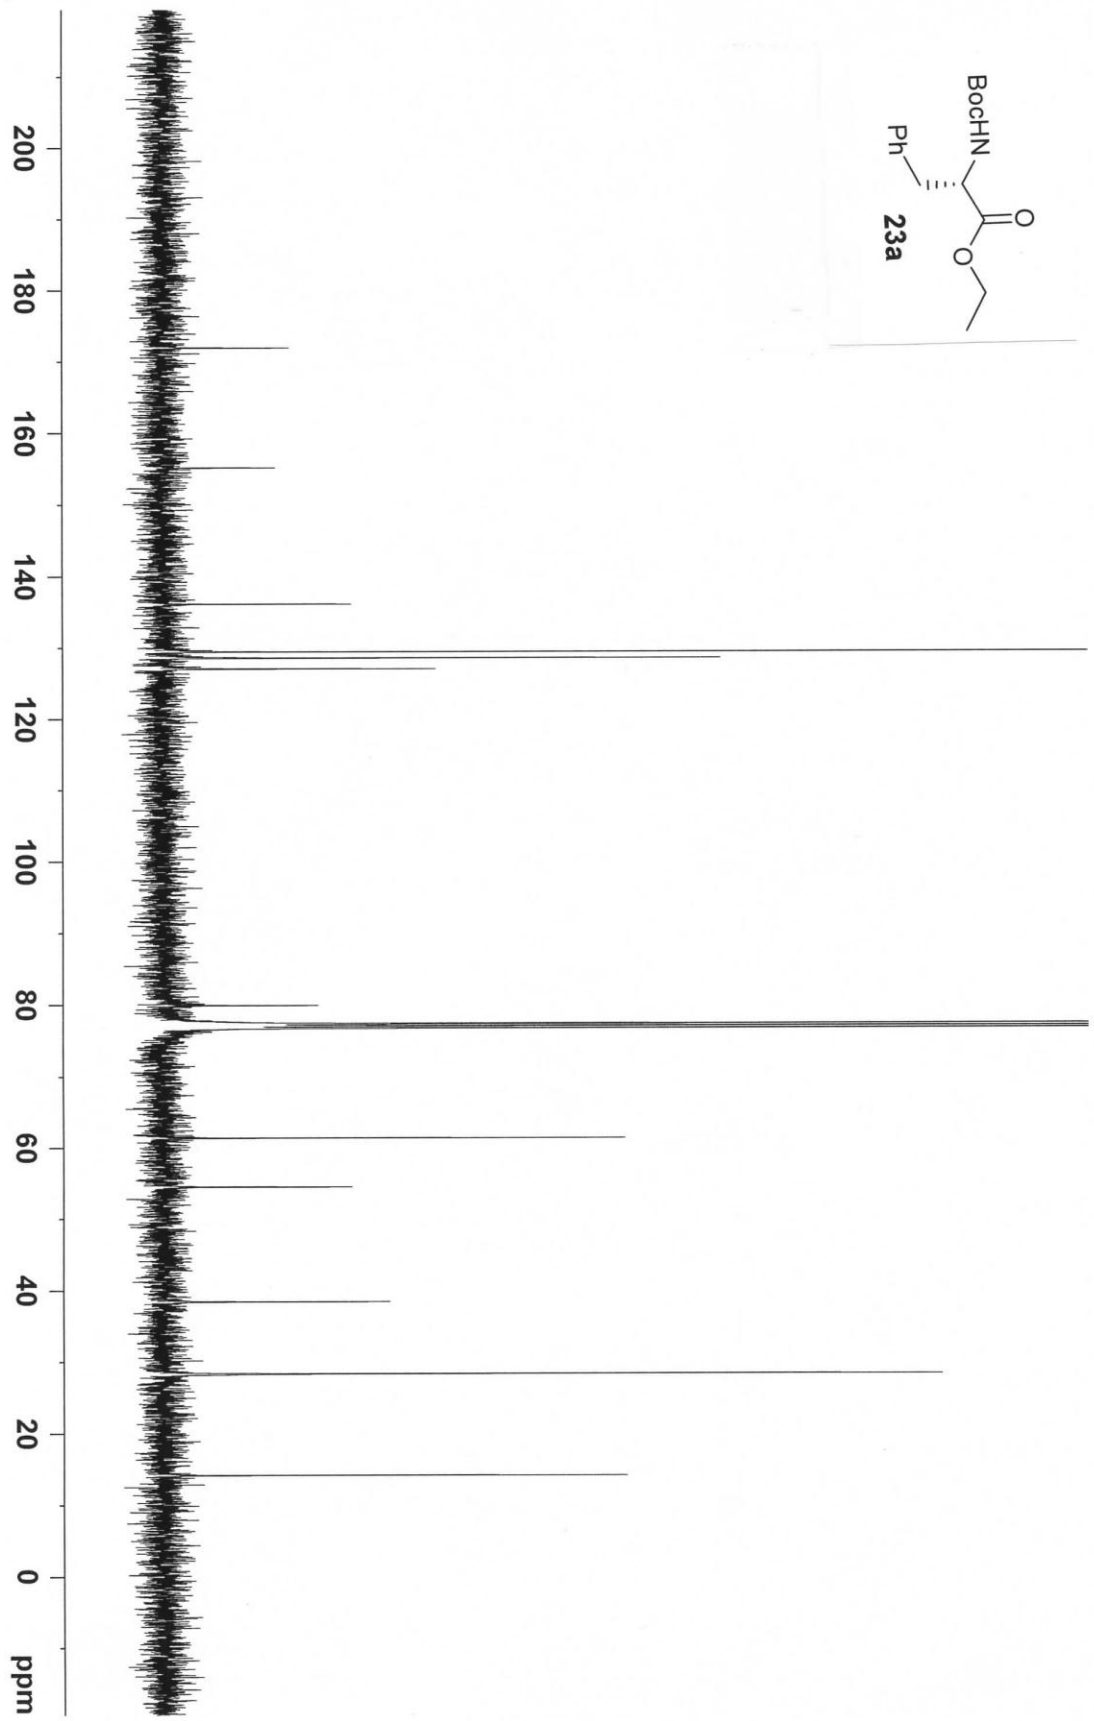

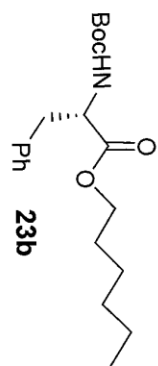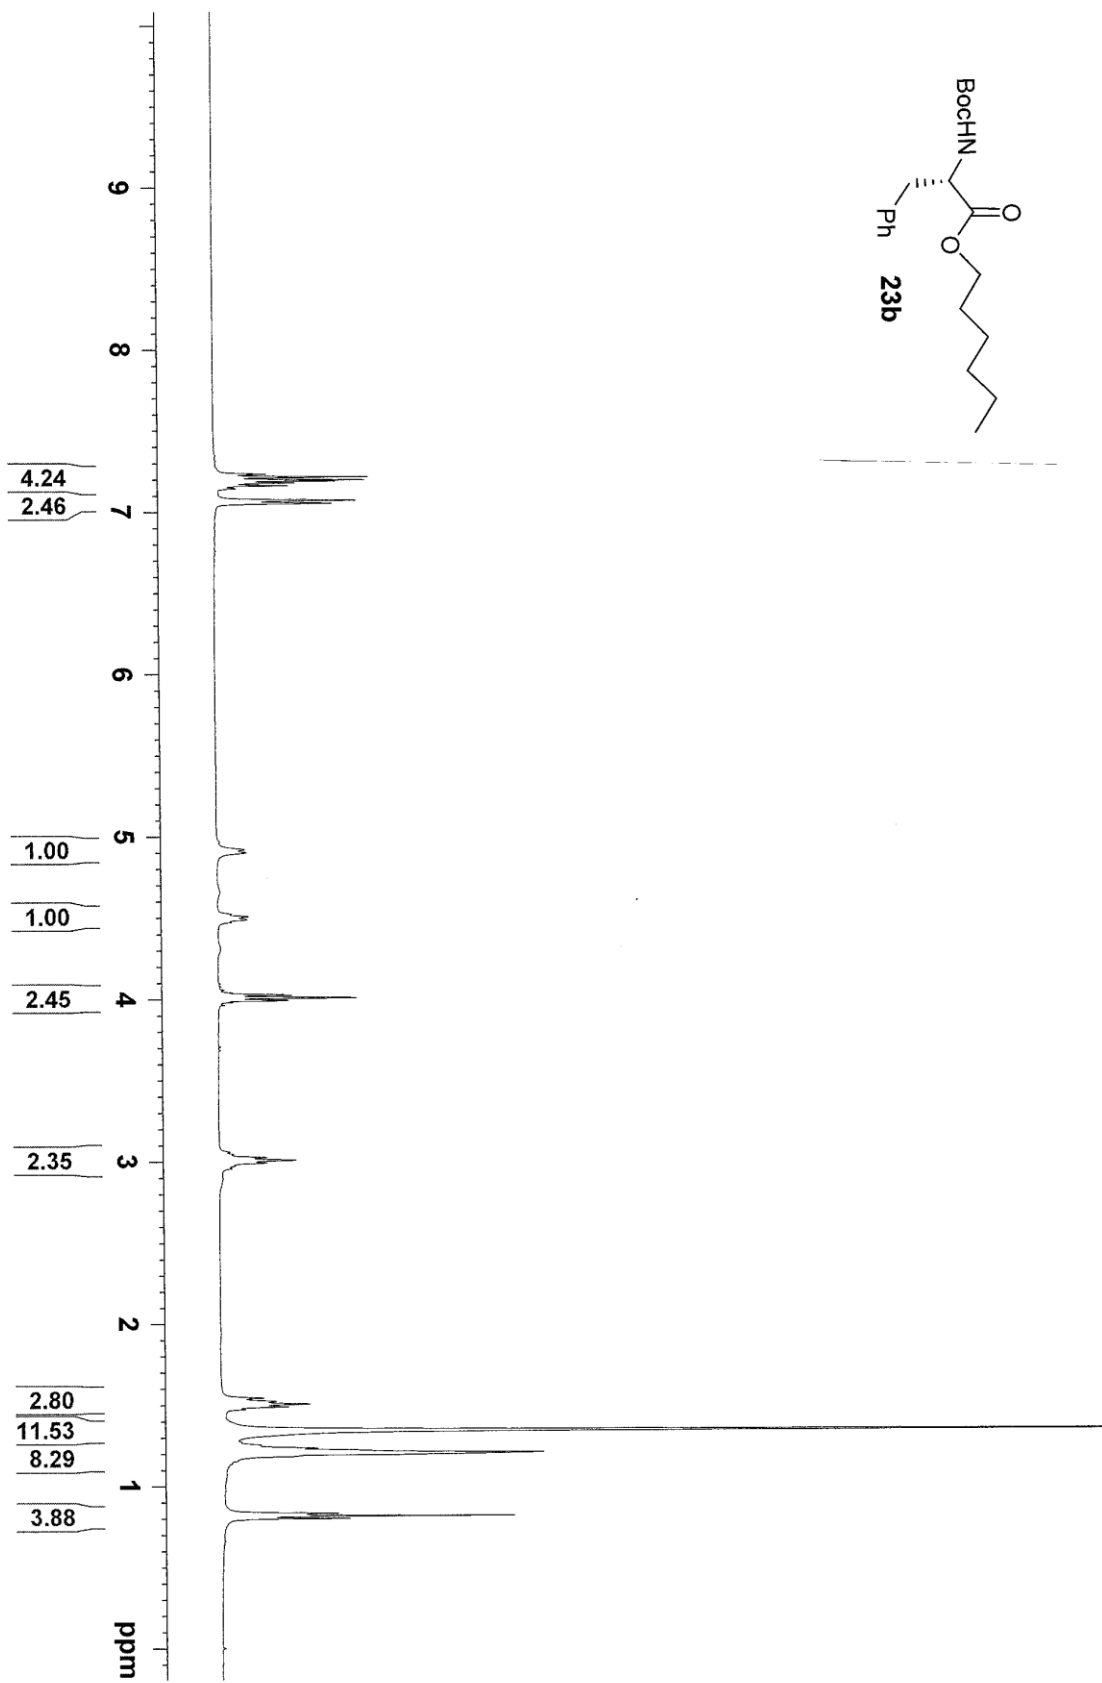

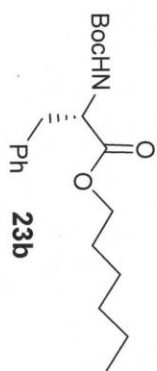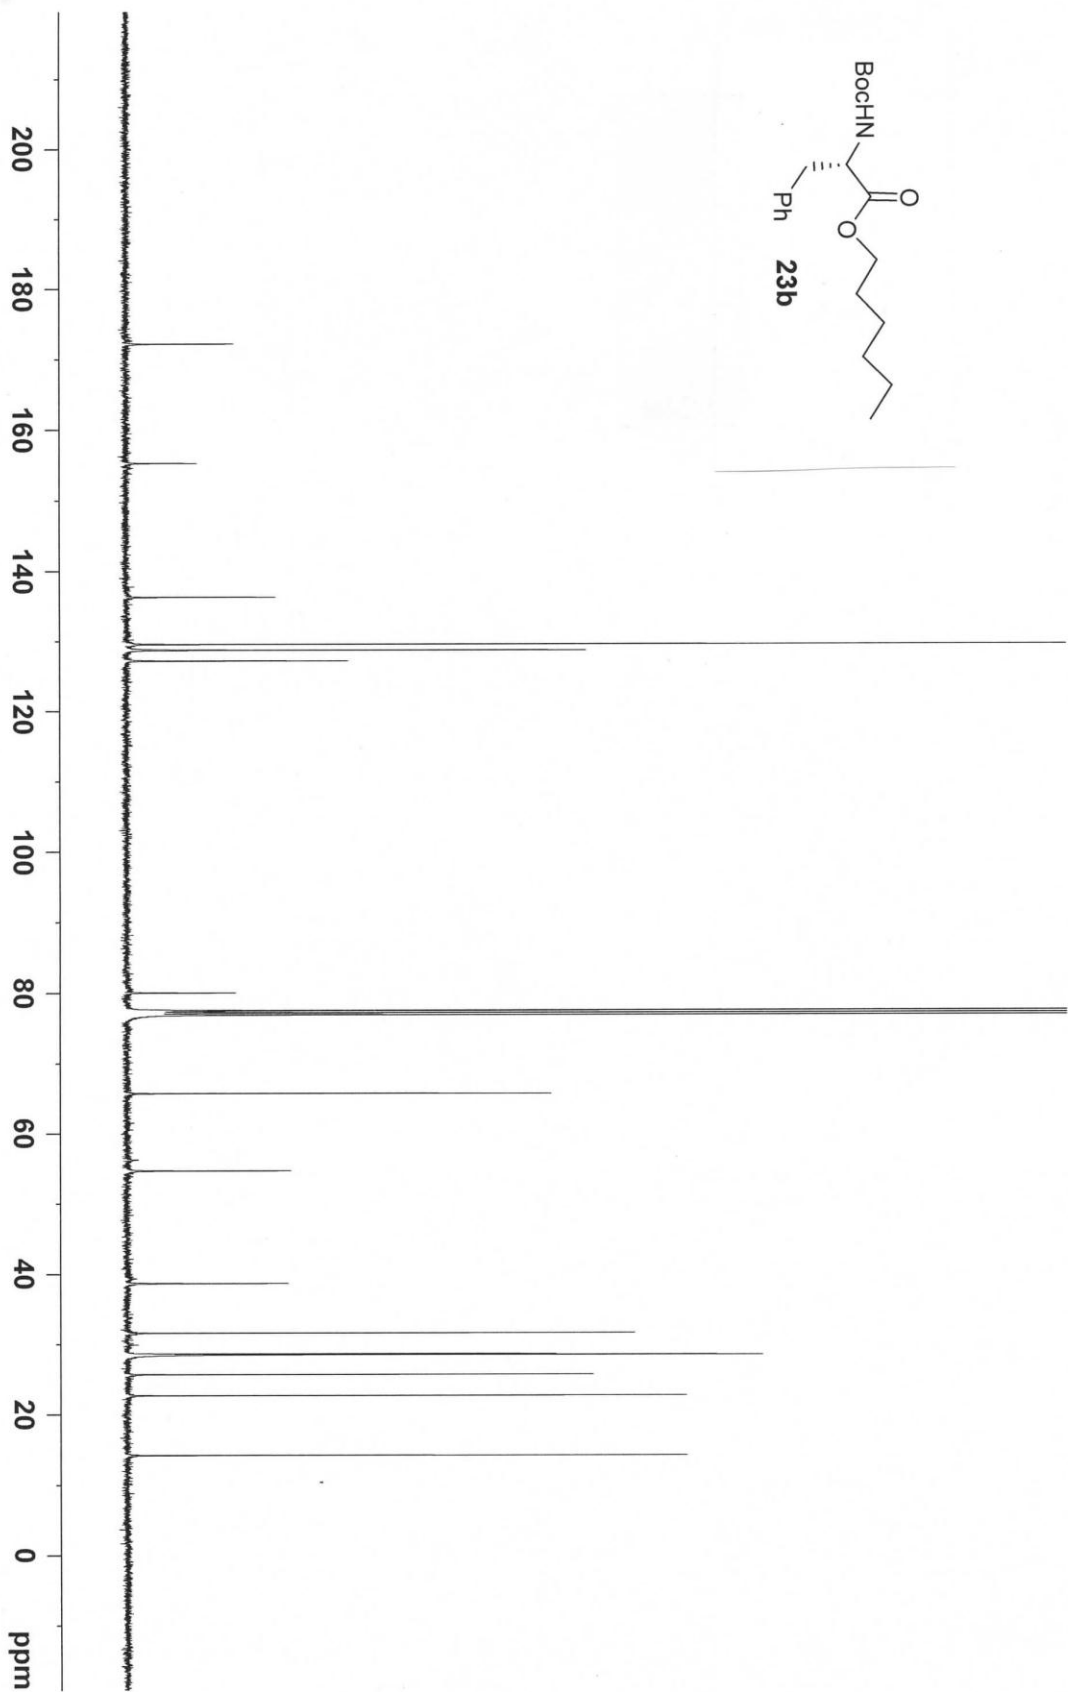



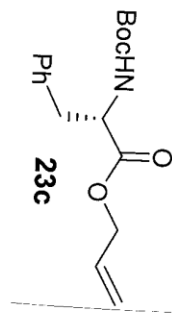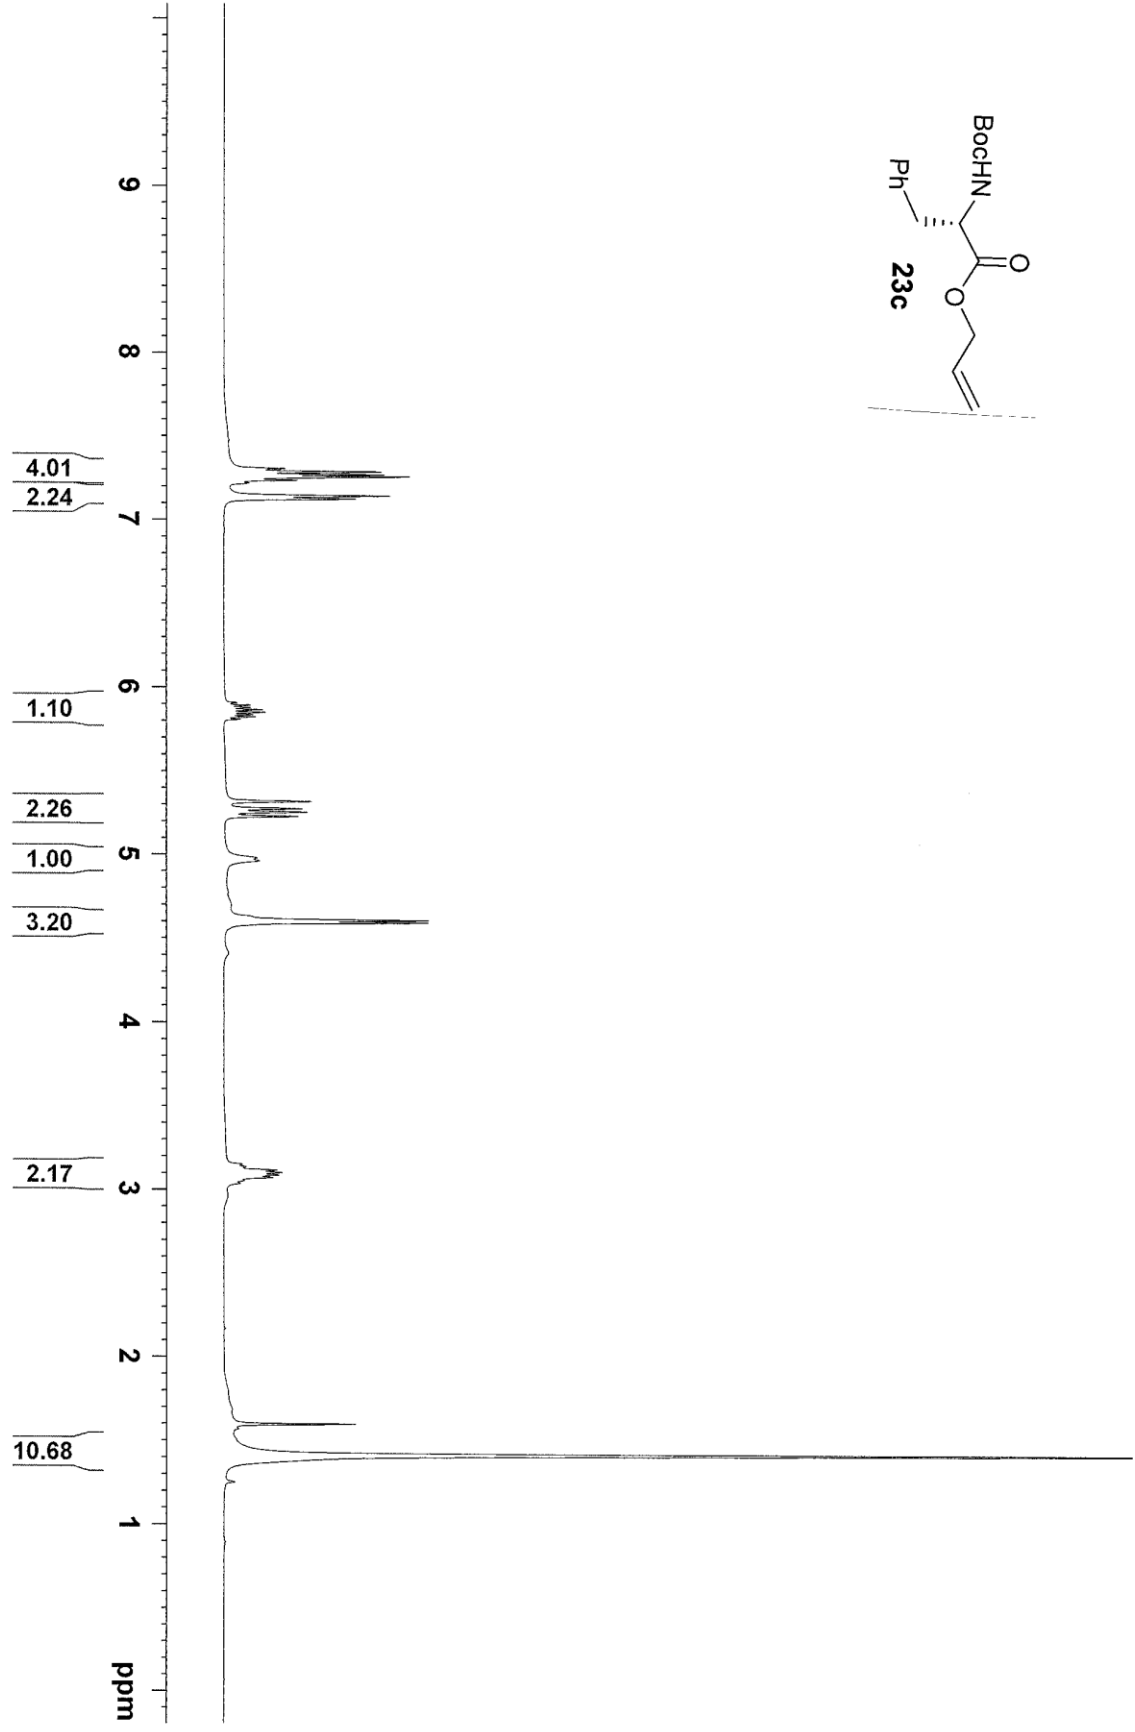

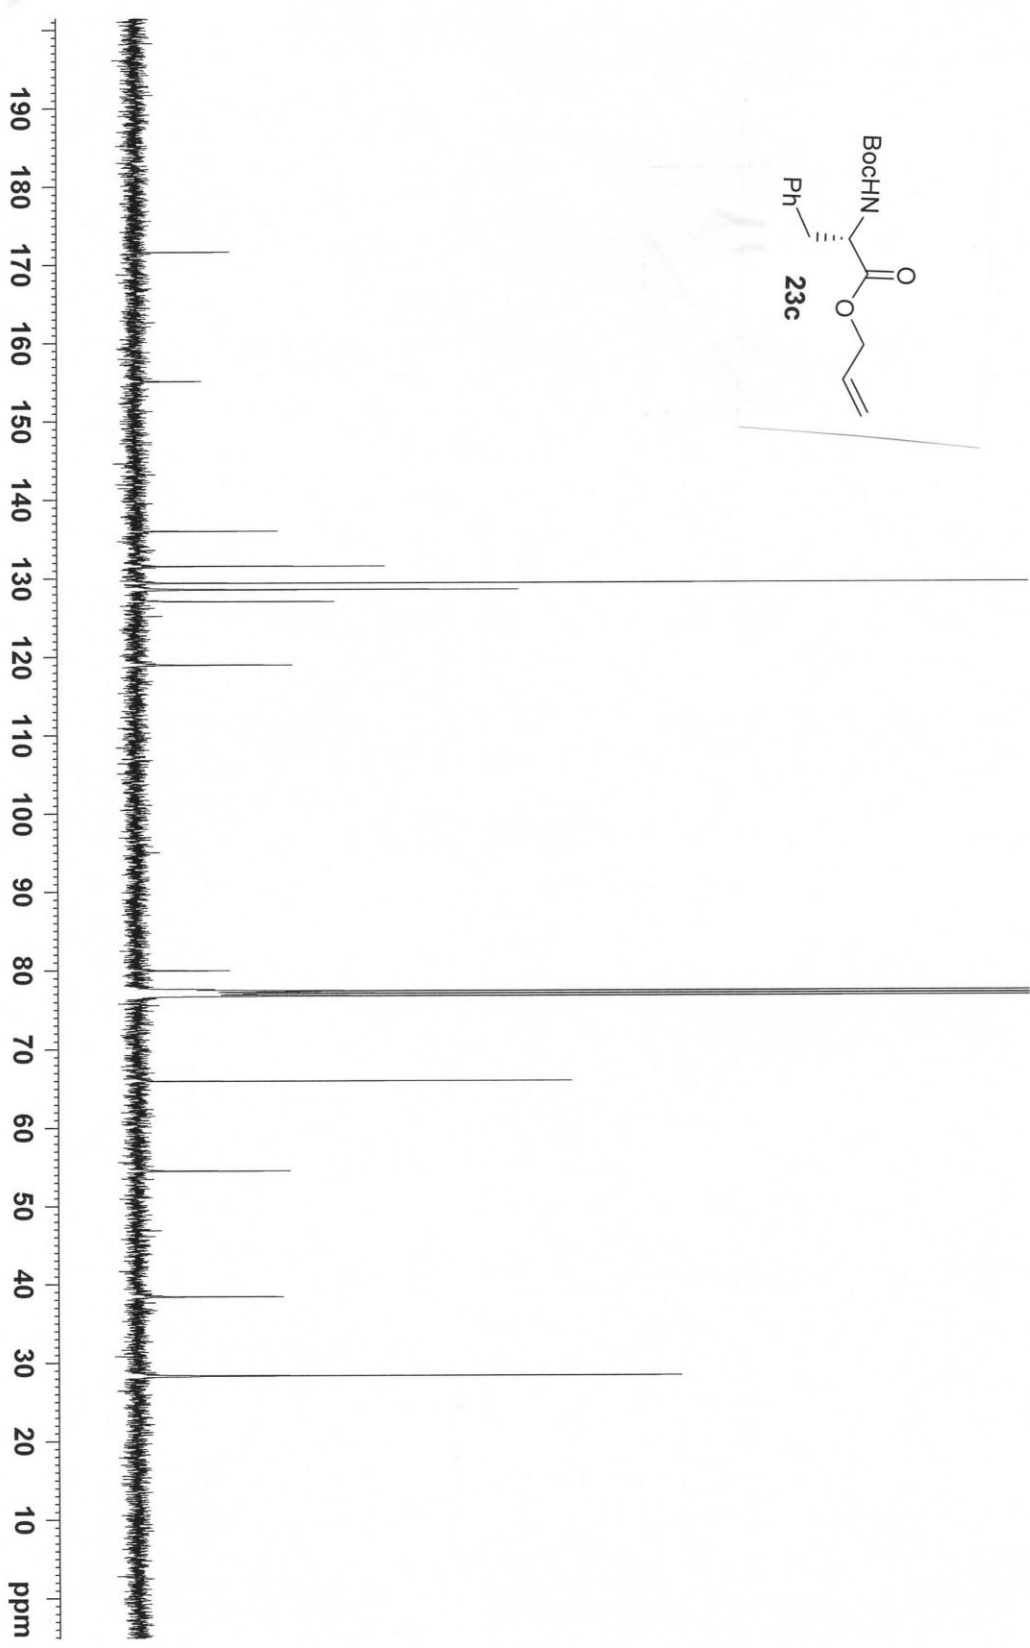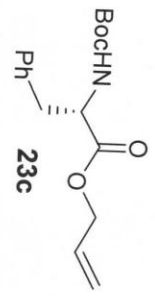

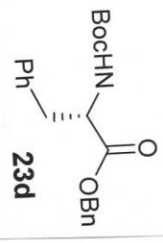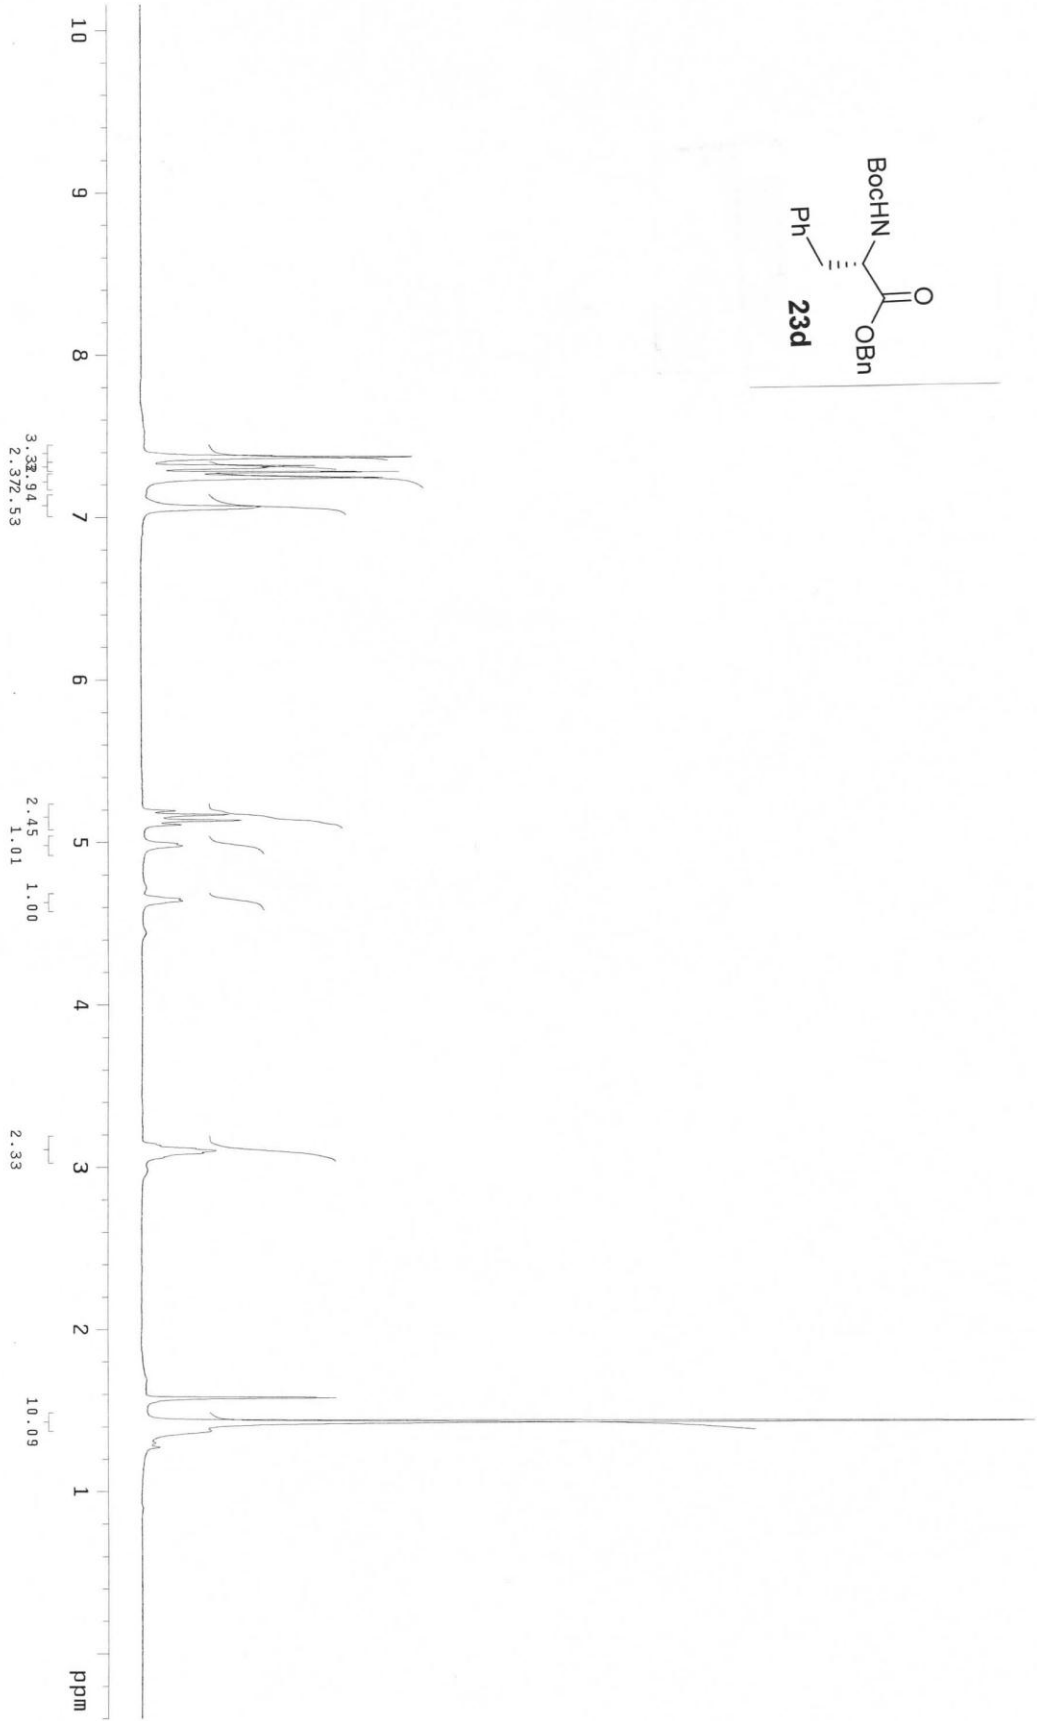

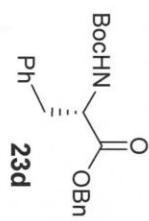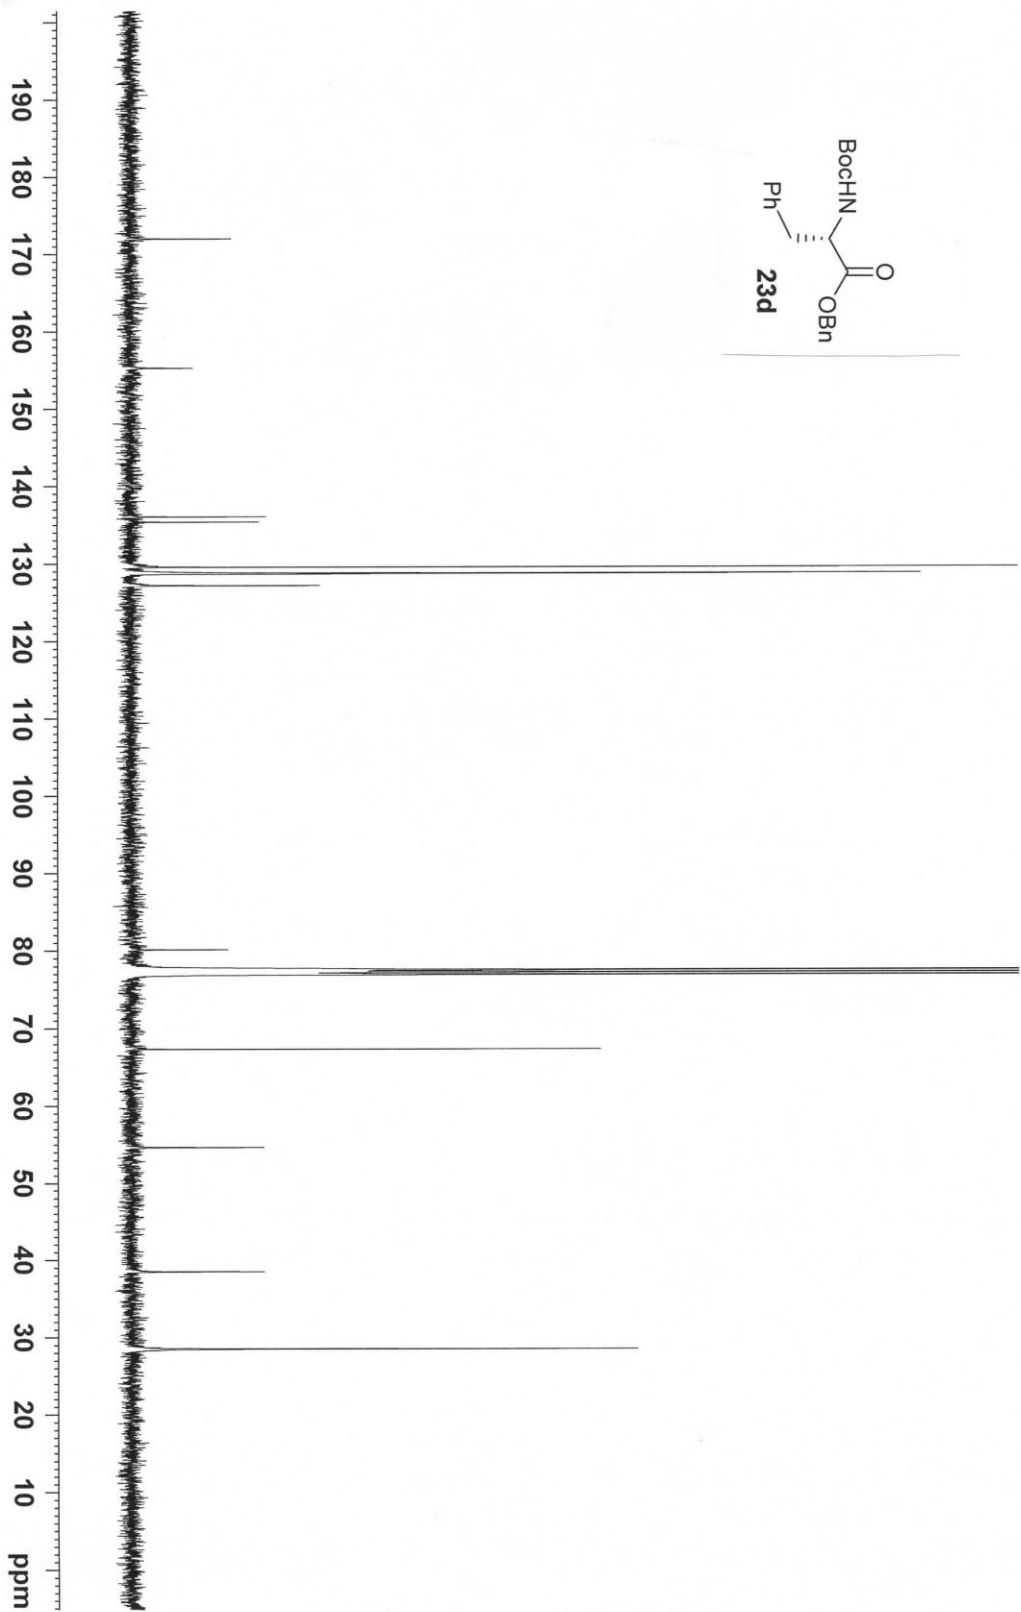

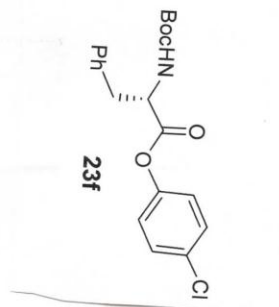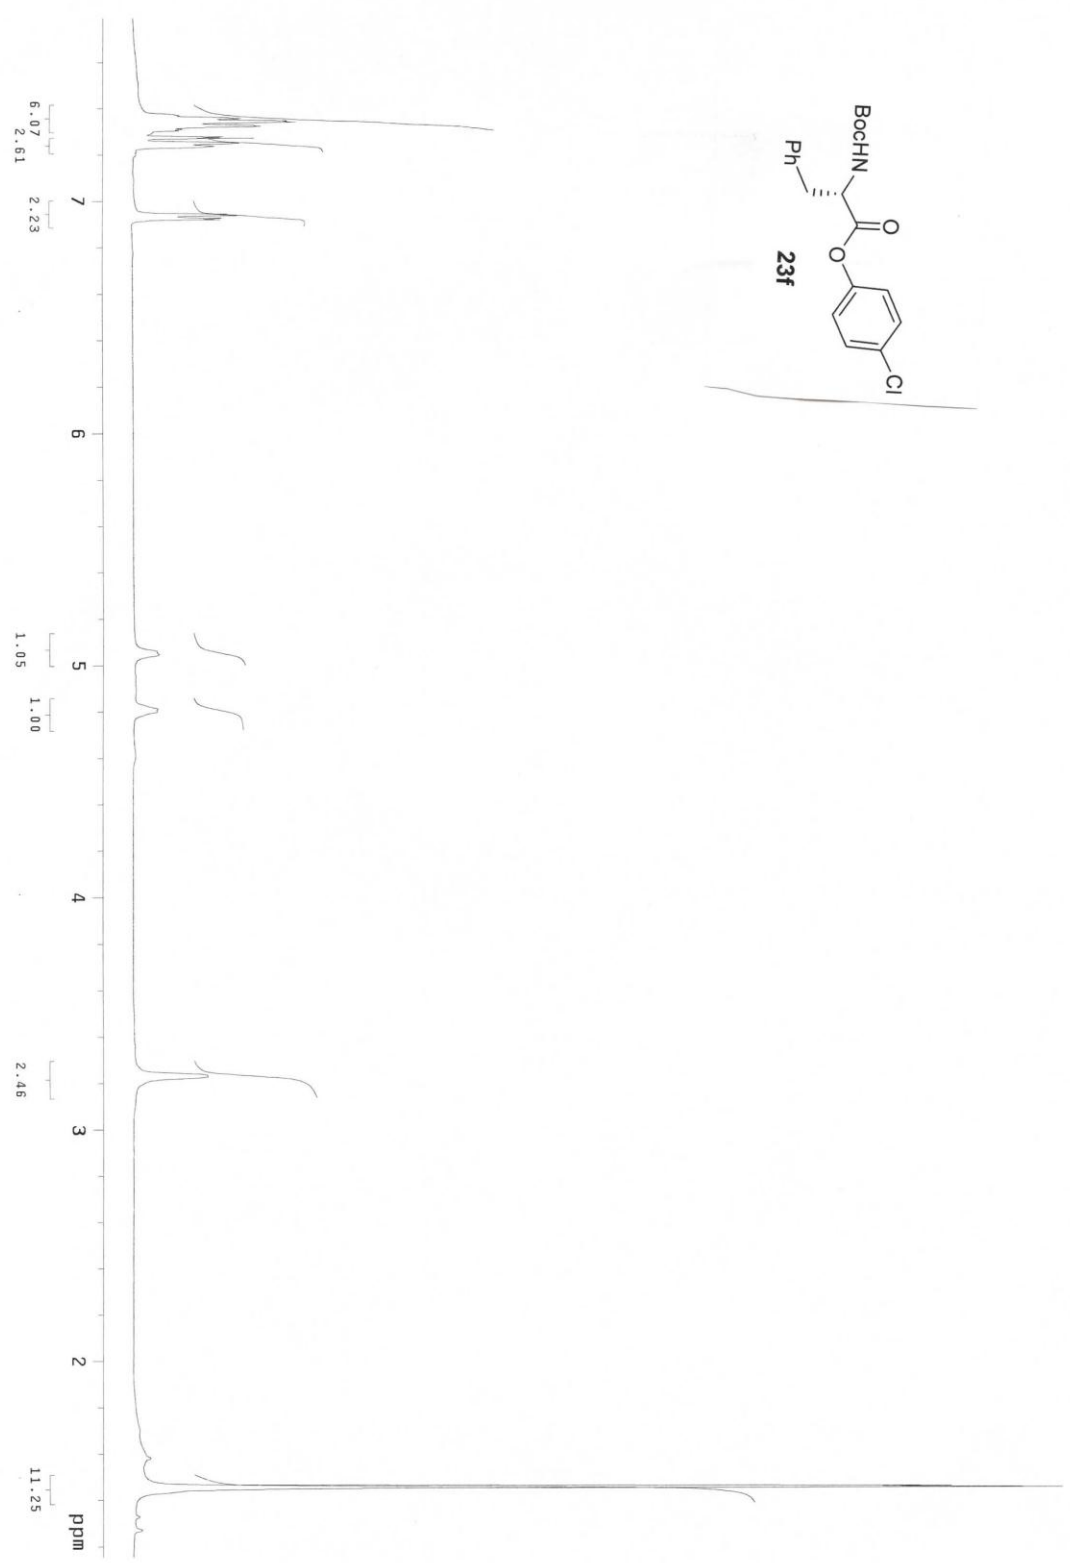

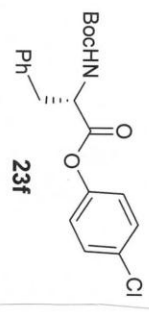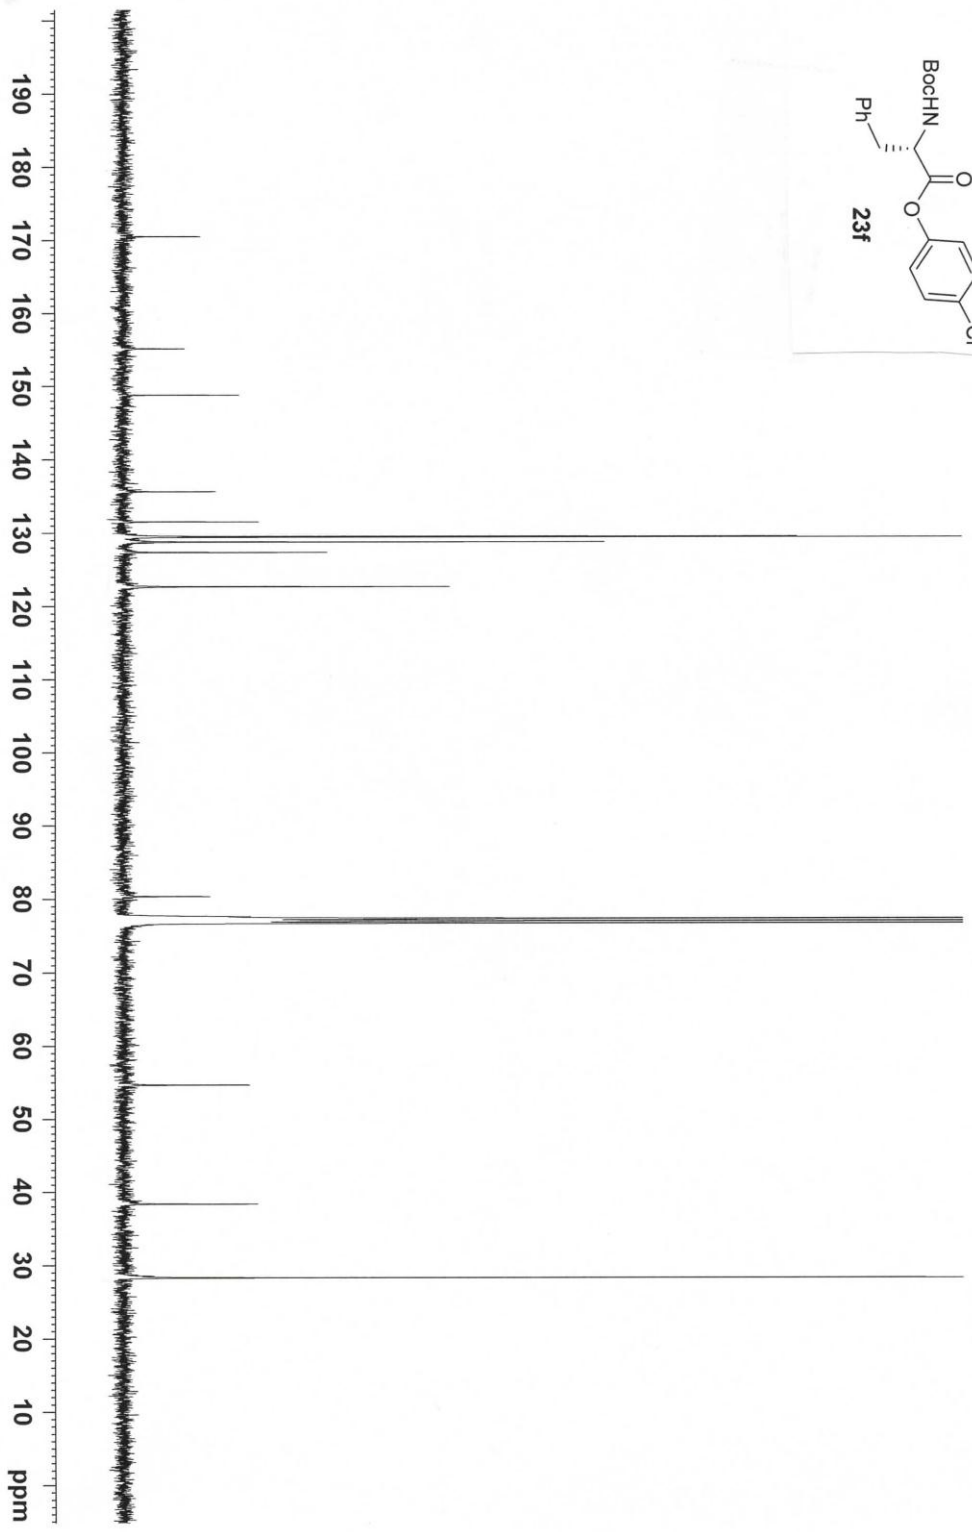

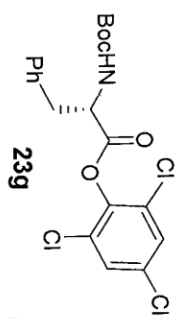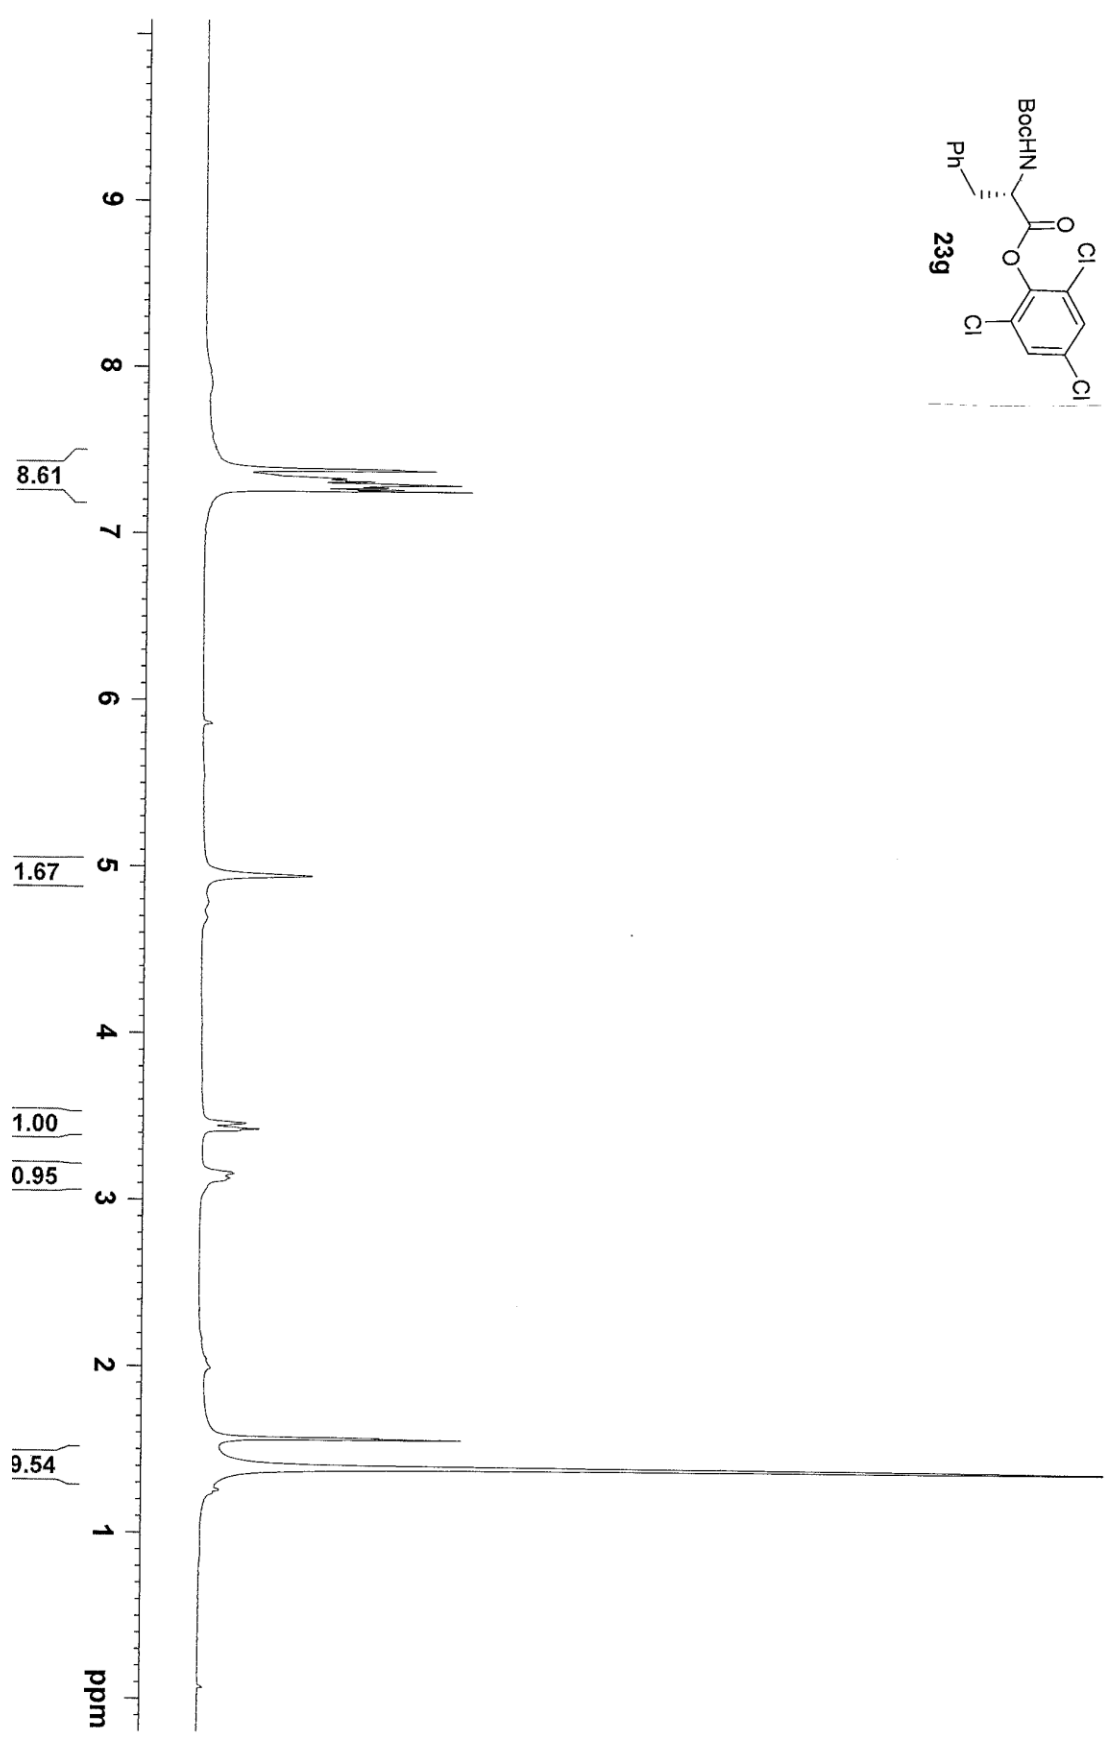

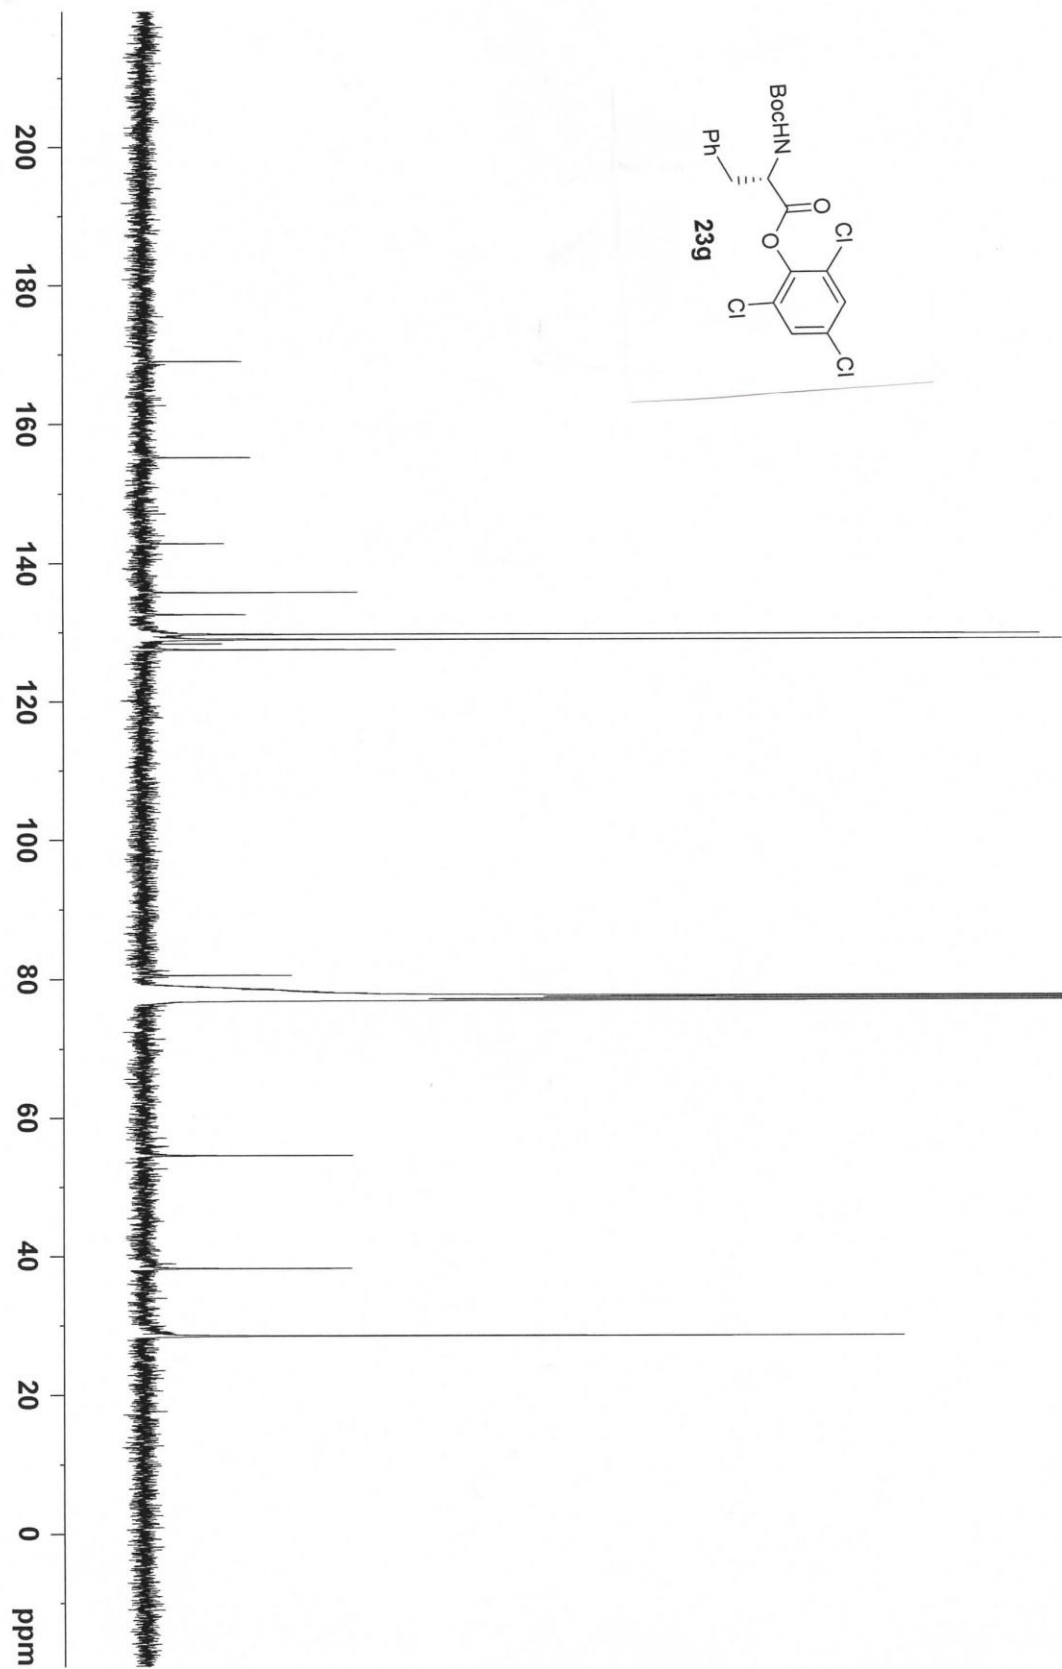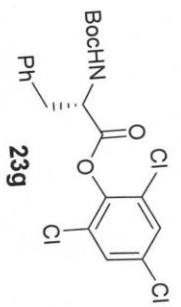



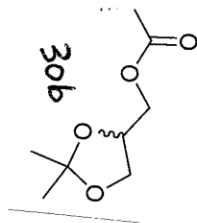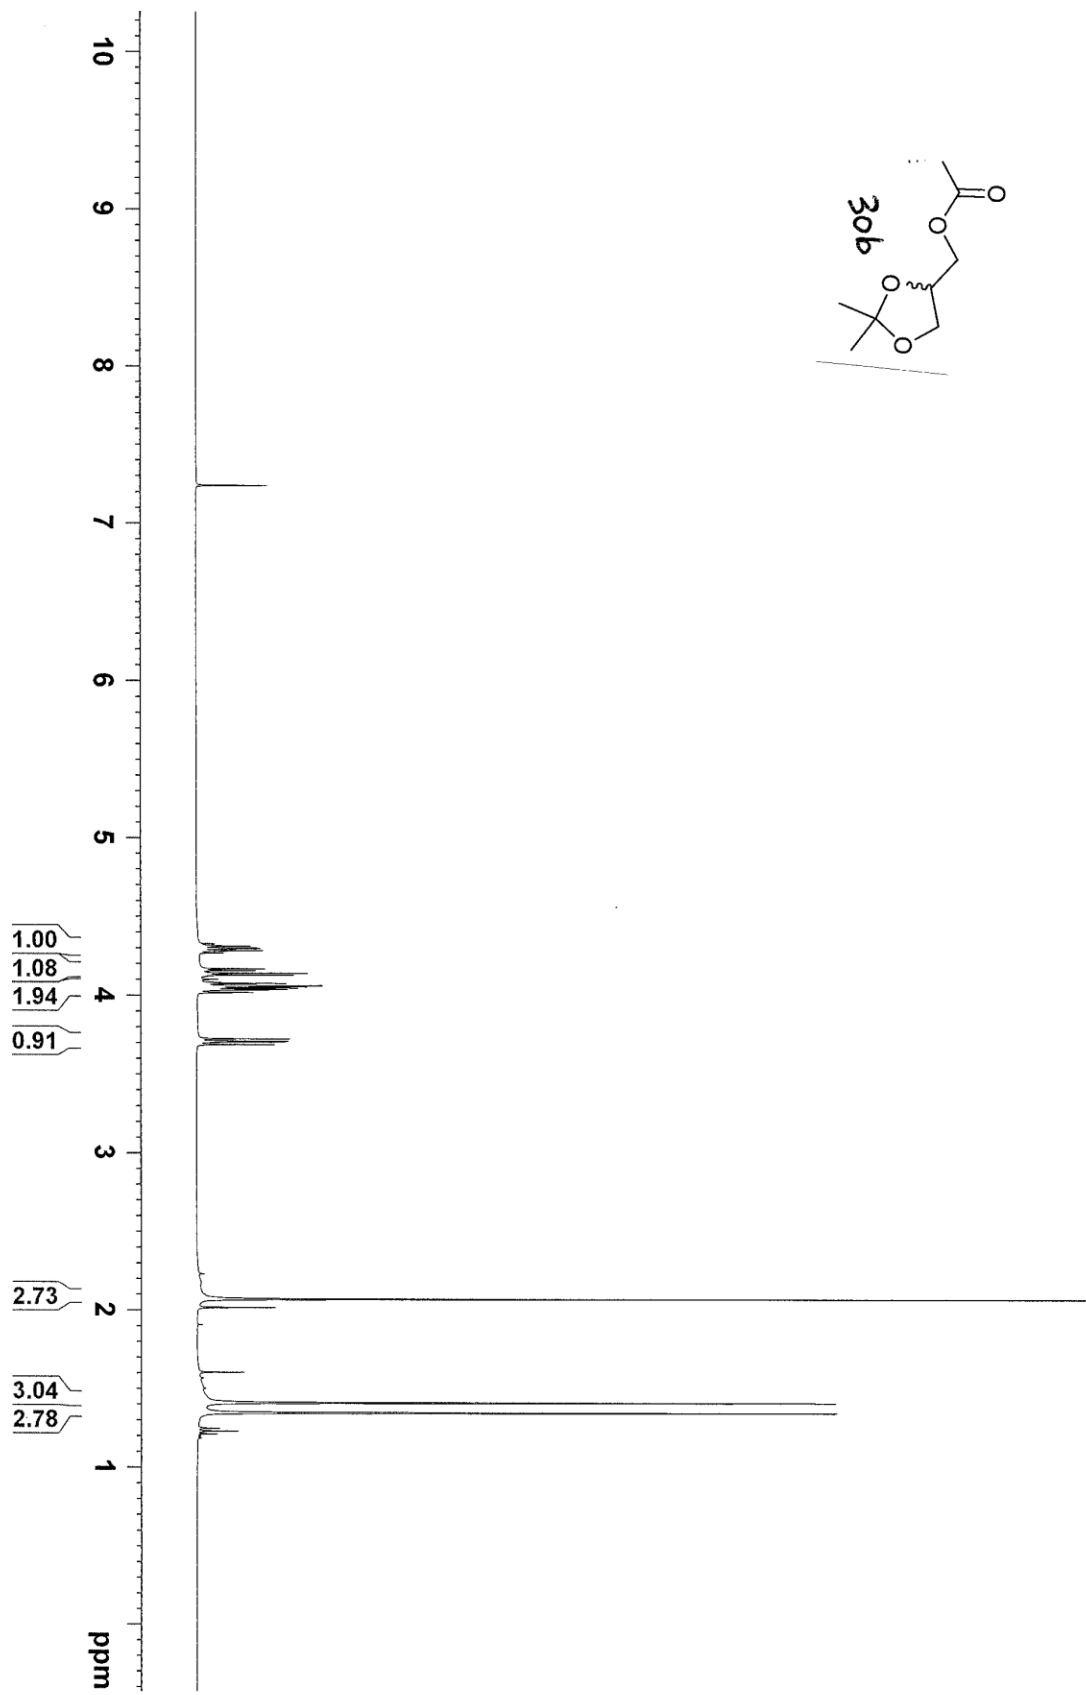

200  
180  
160  
140  
120  
100  
80  
60  
40  
20  
0  
ppm

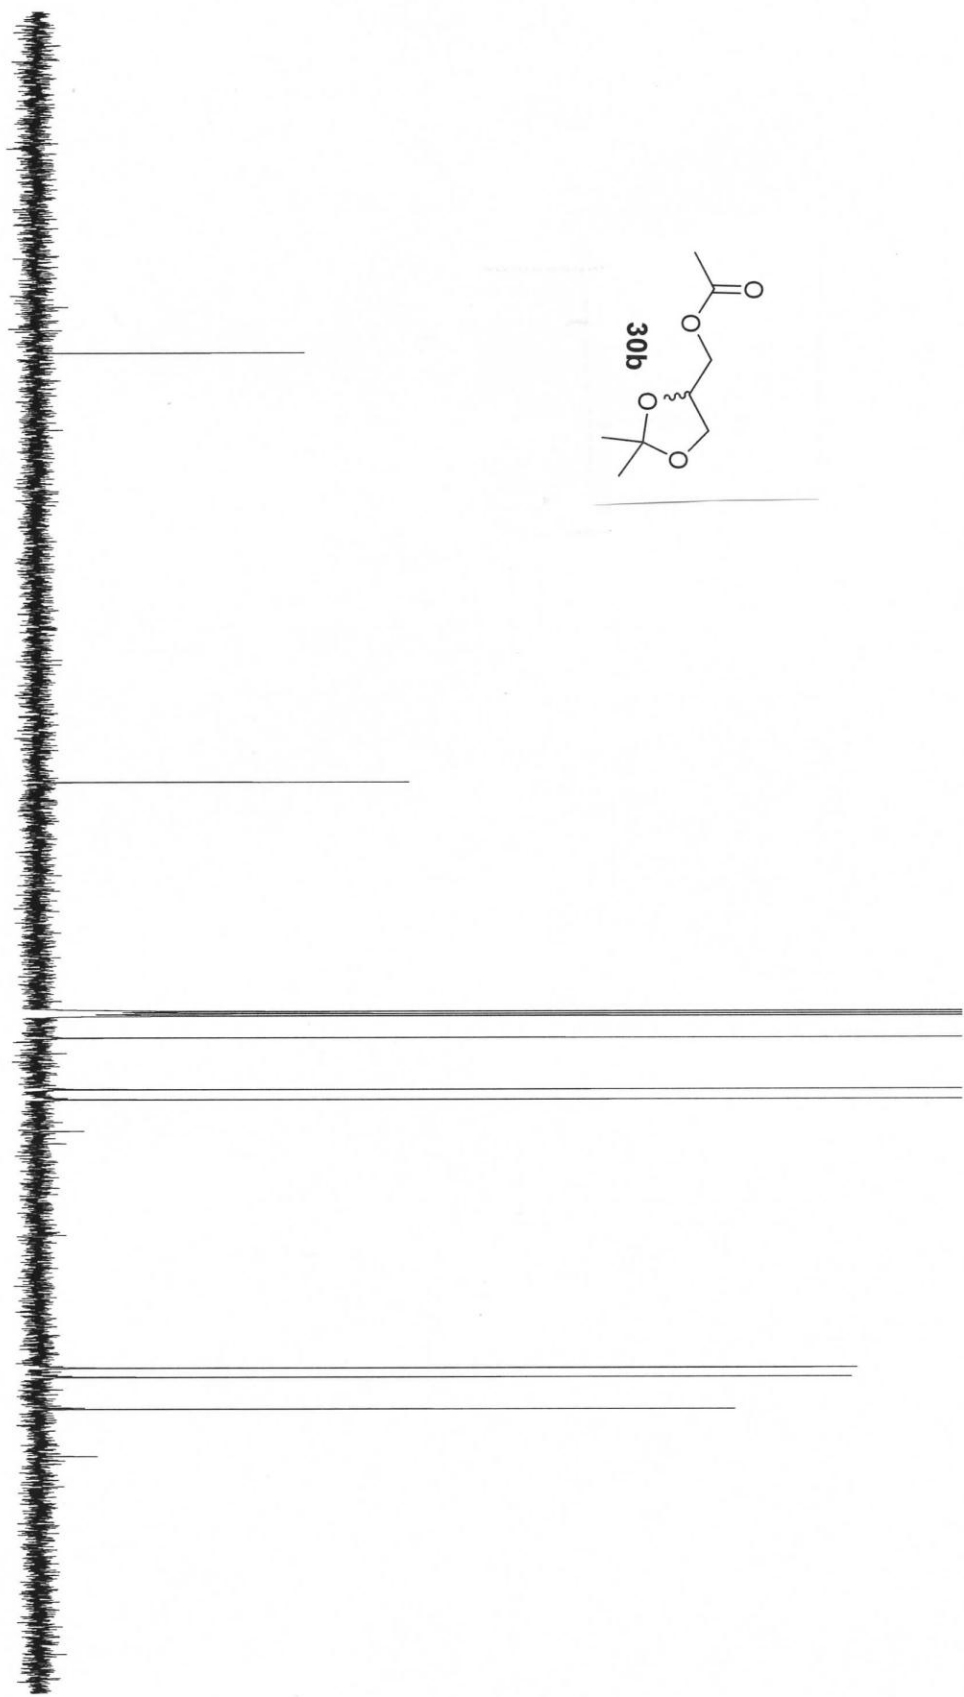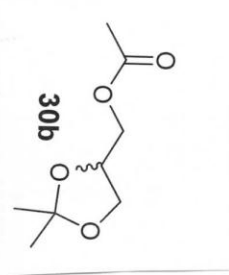

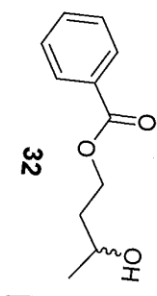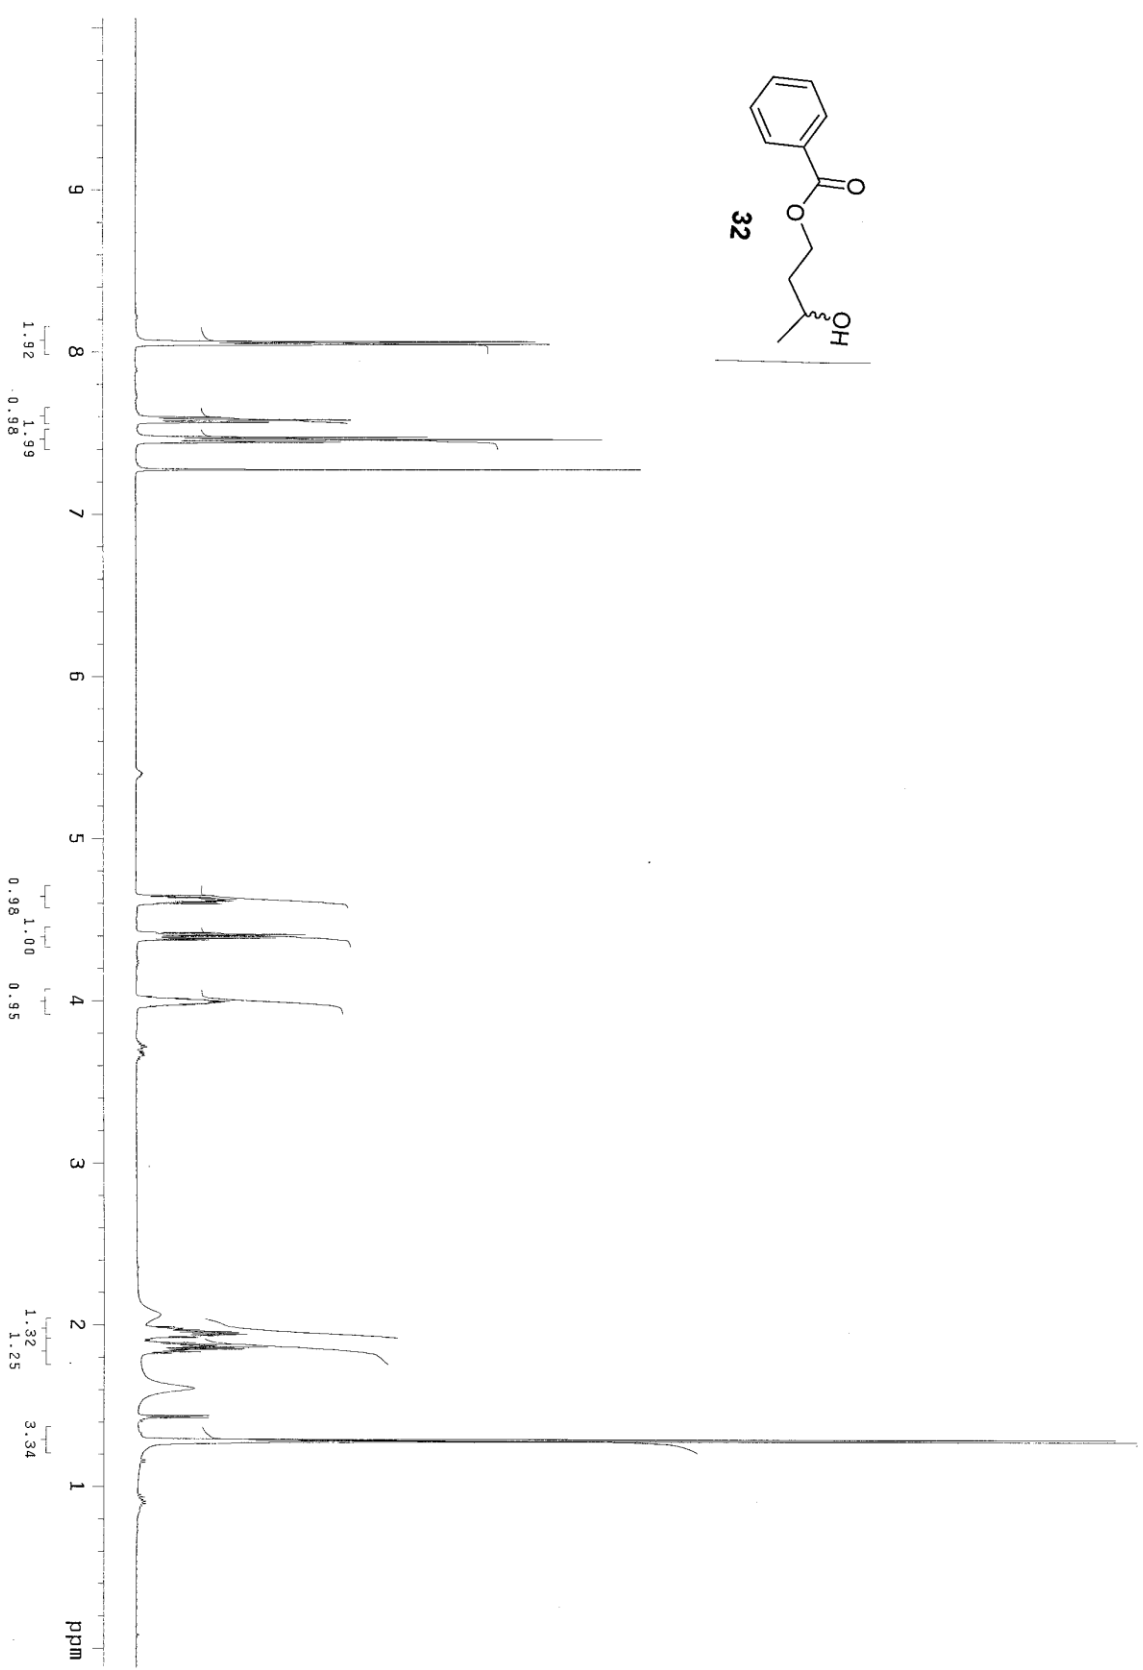

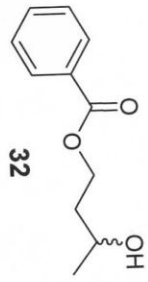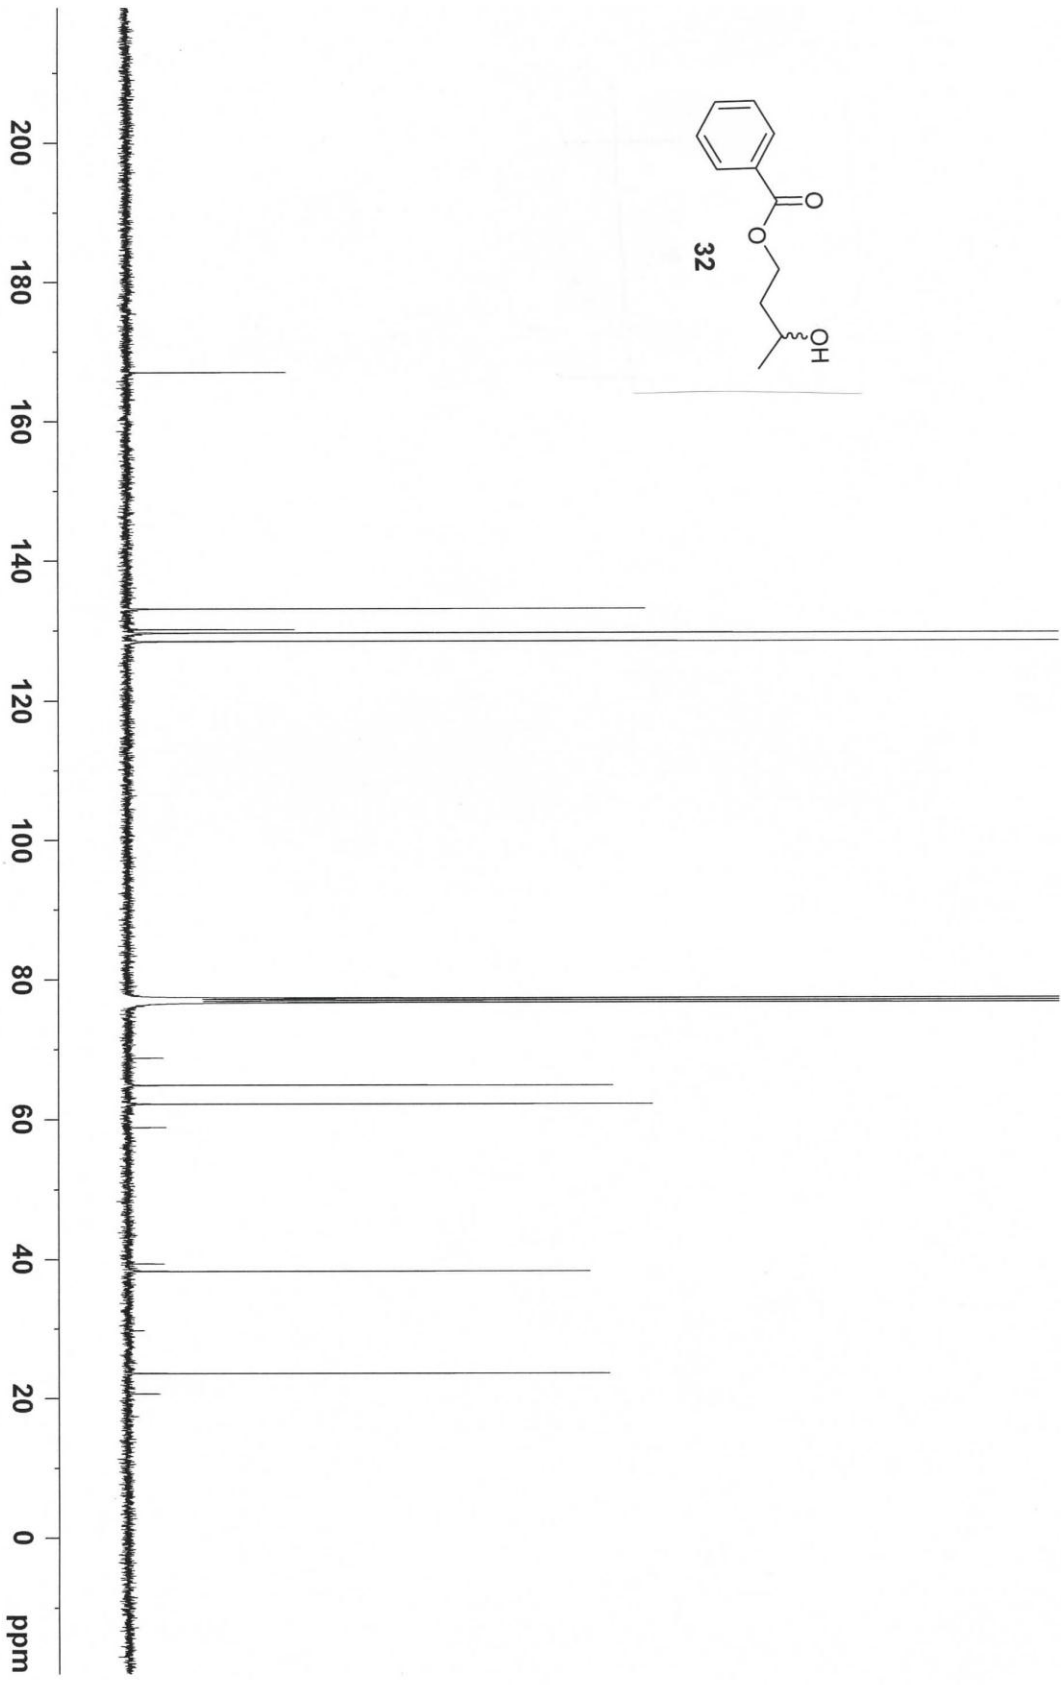

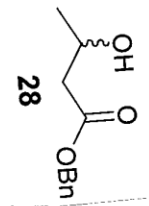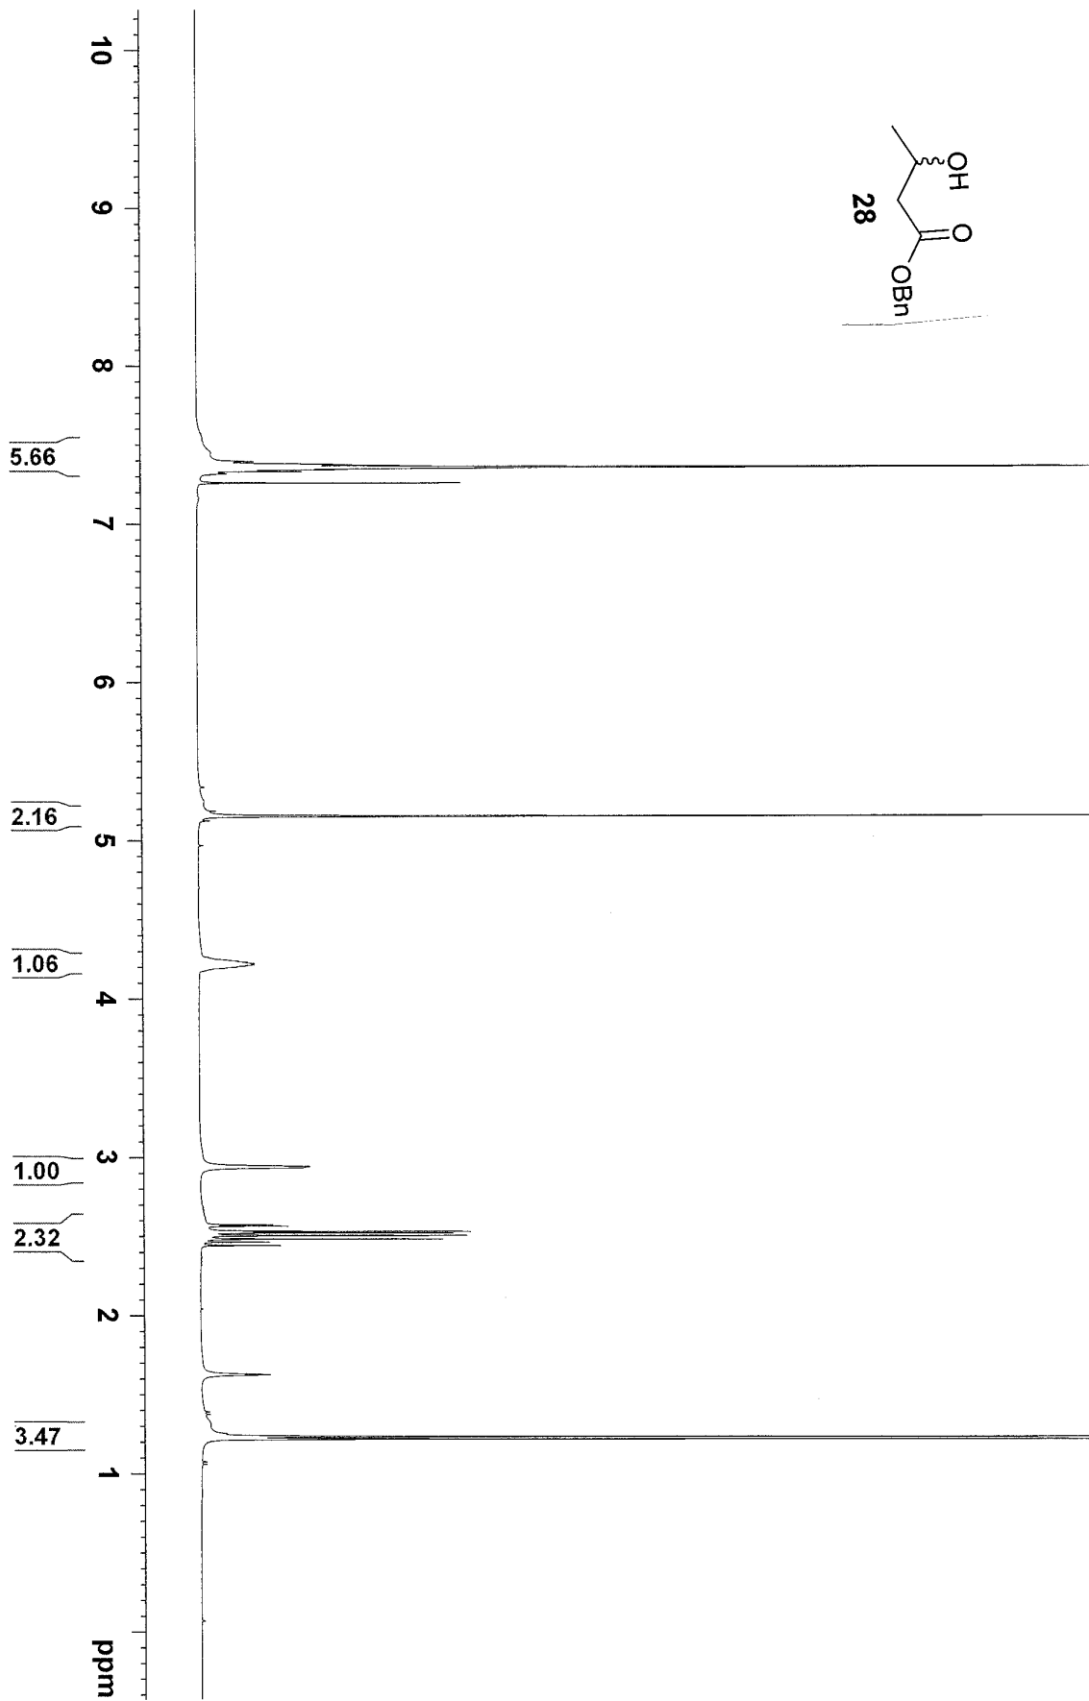

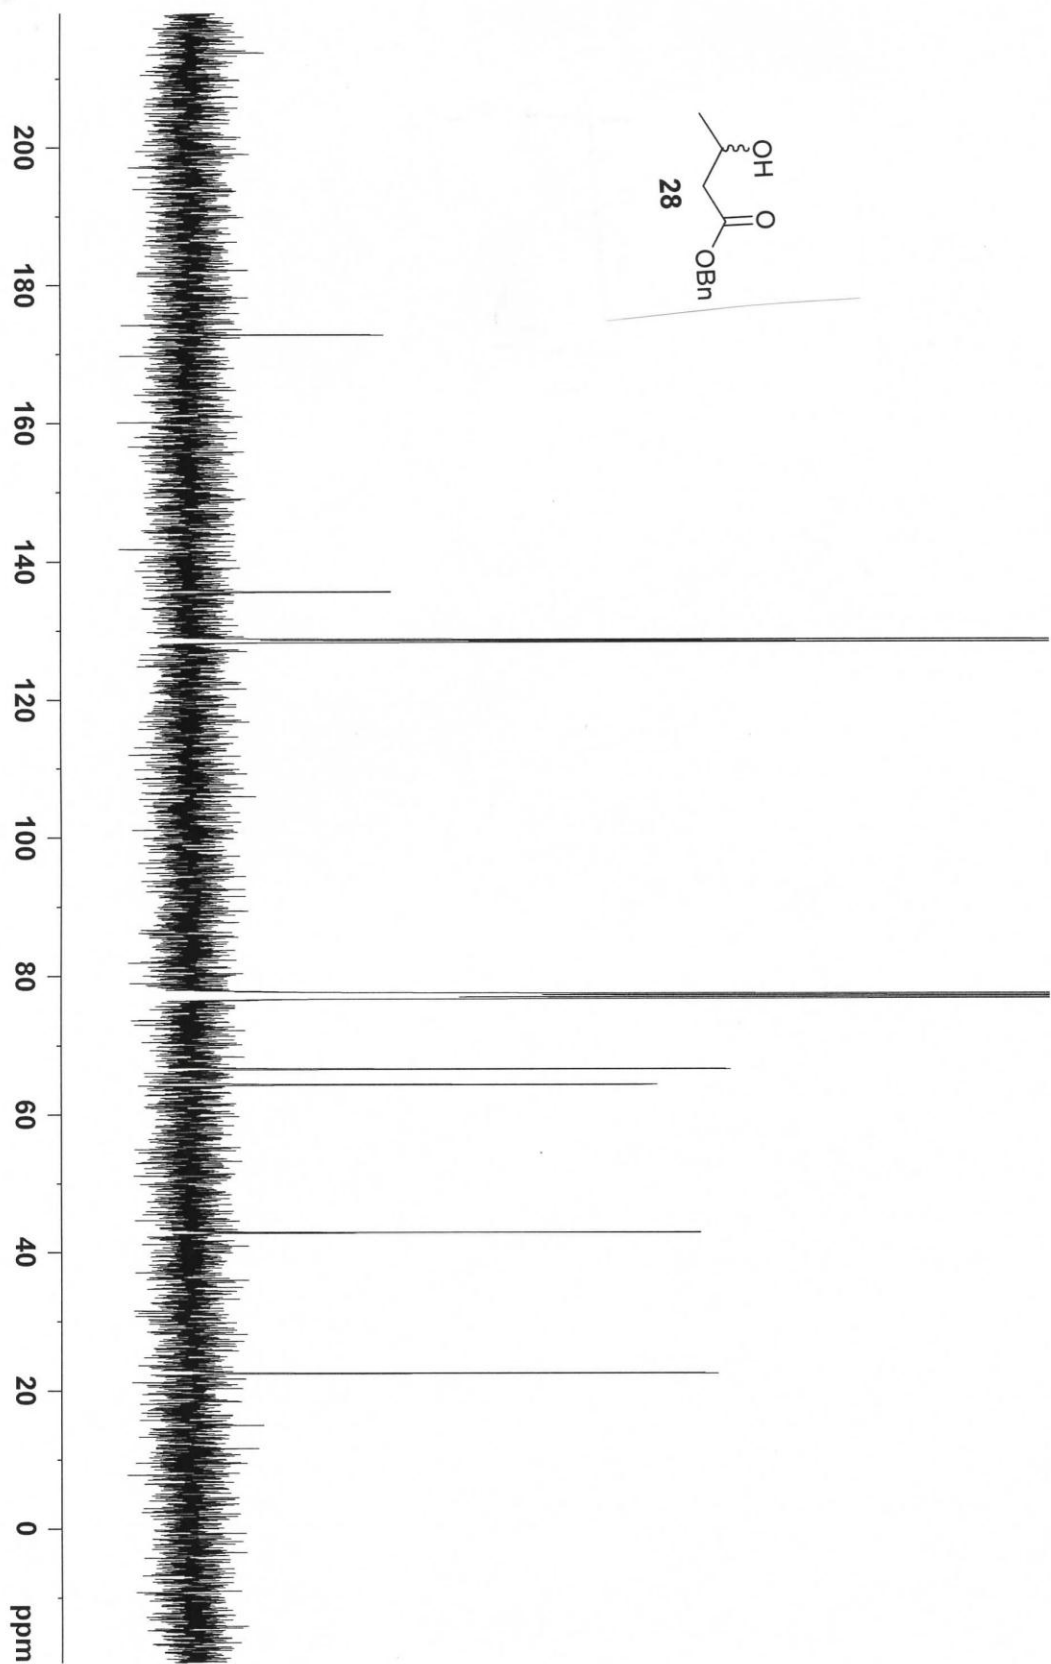

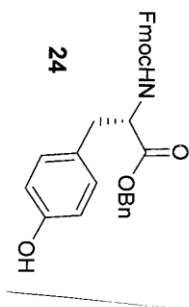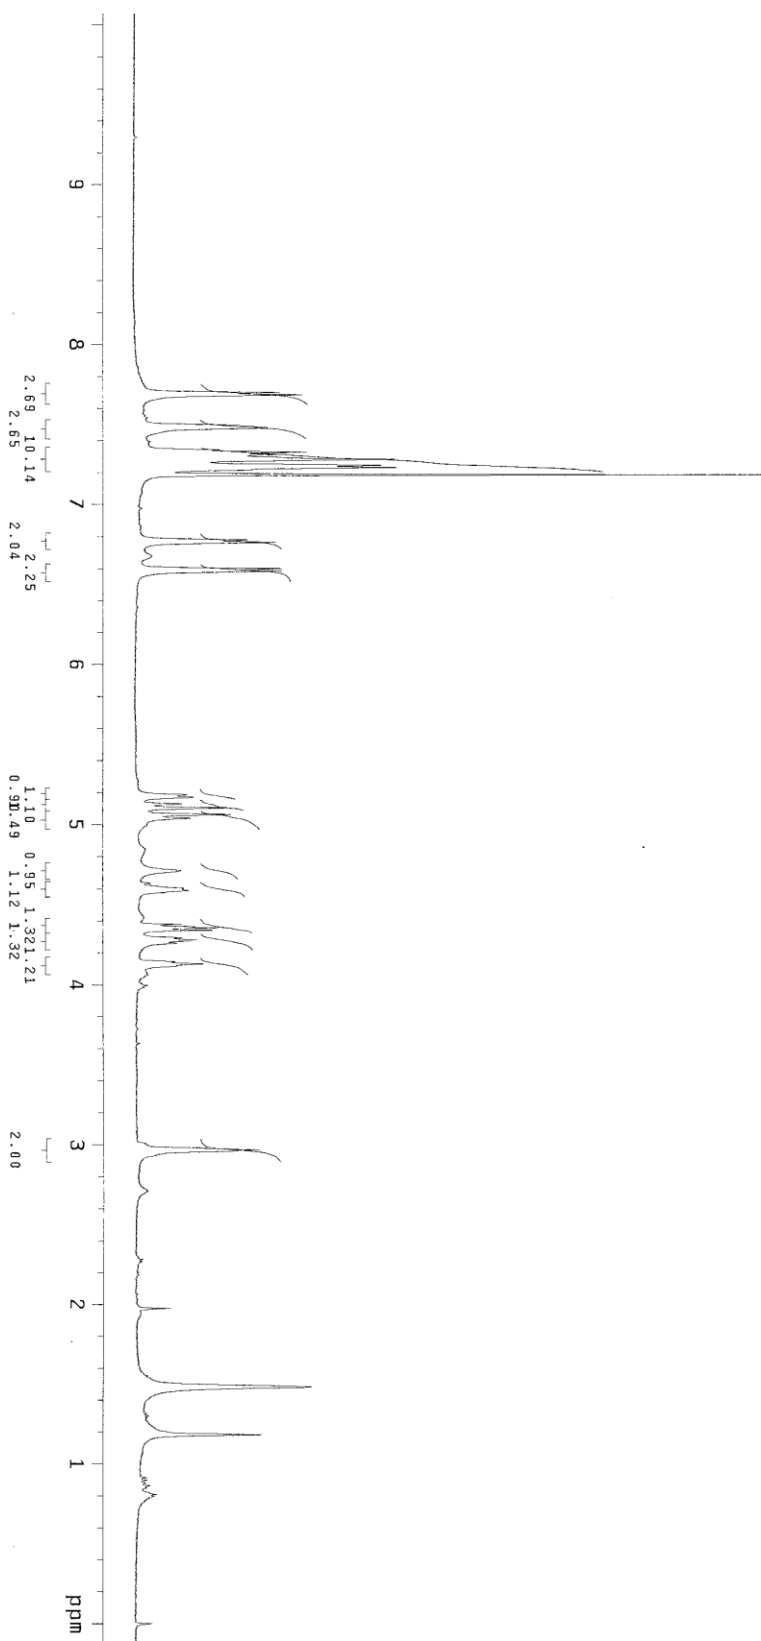

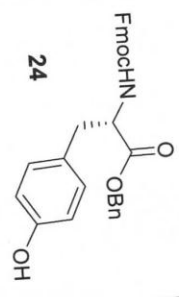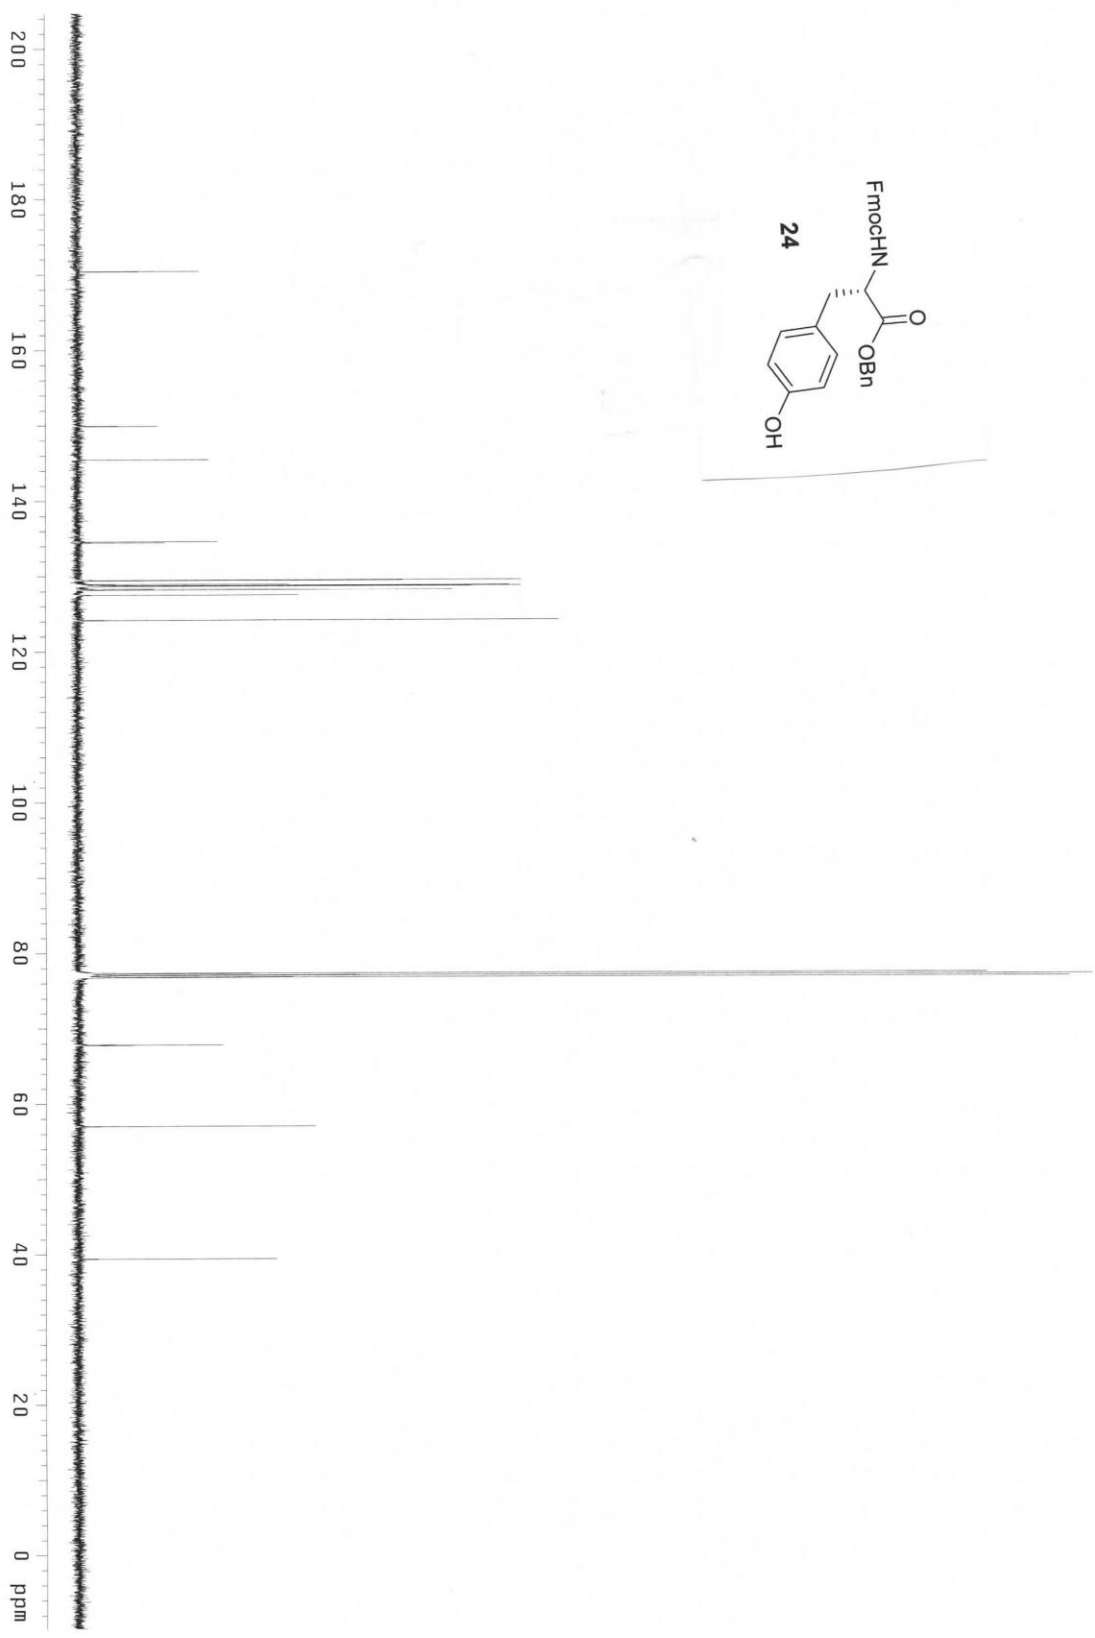



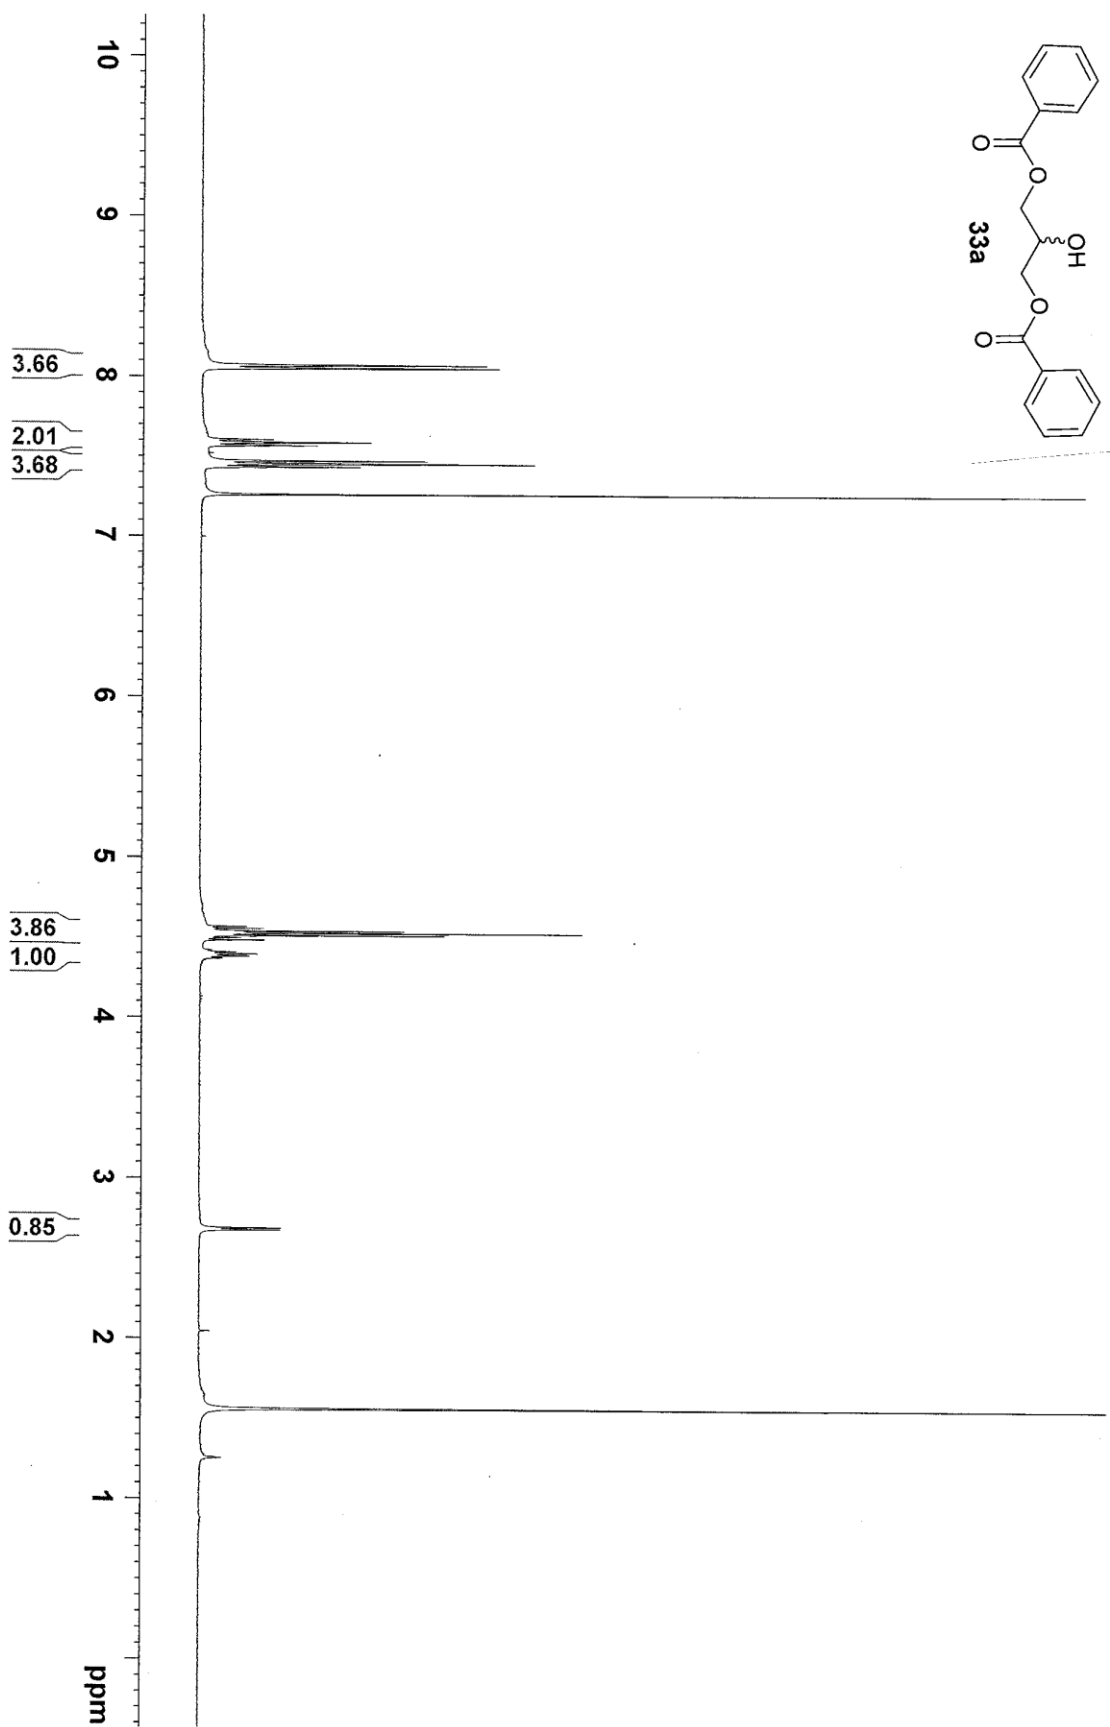

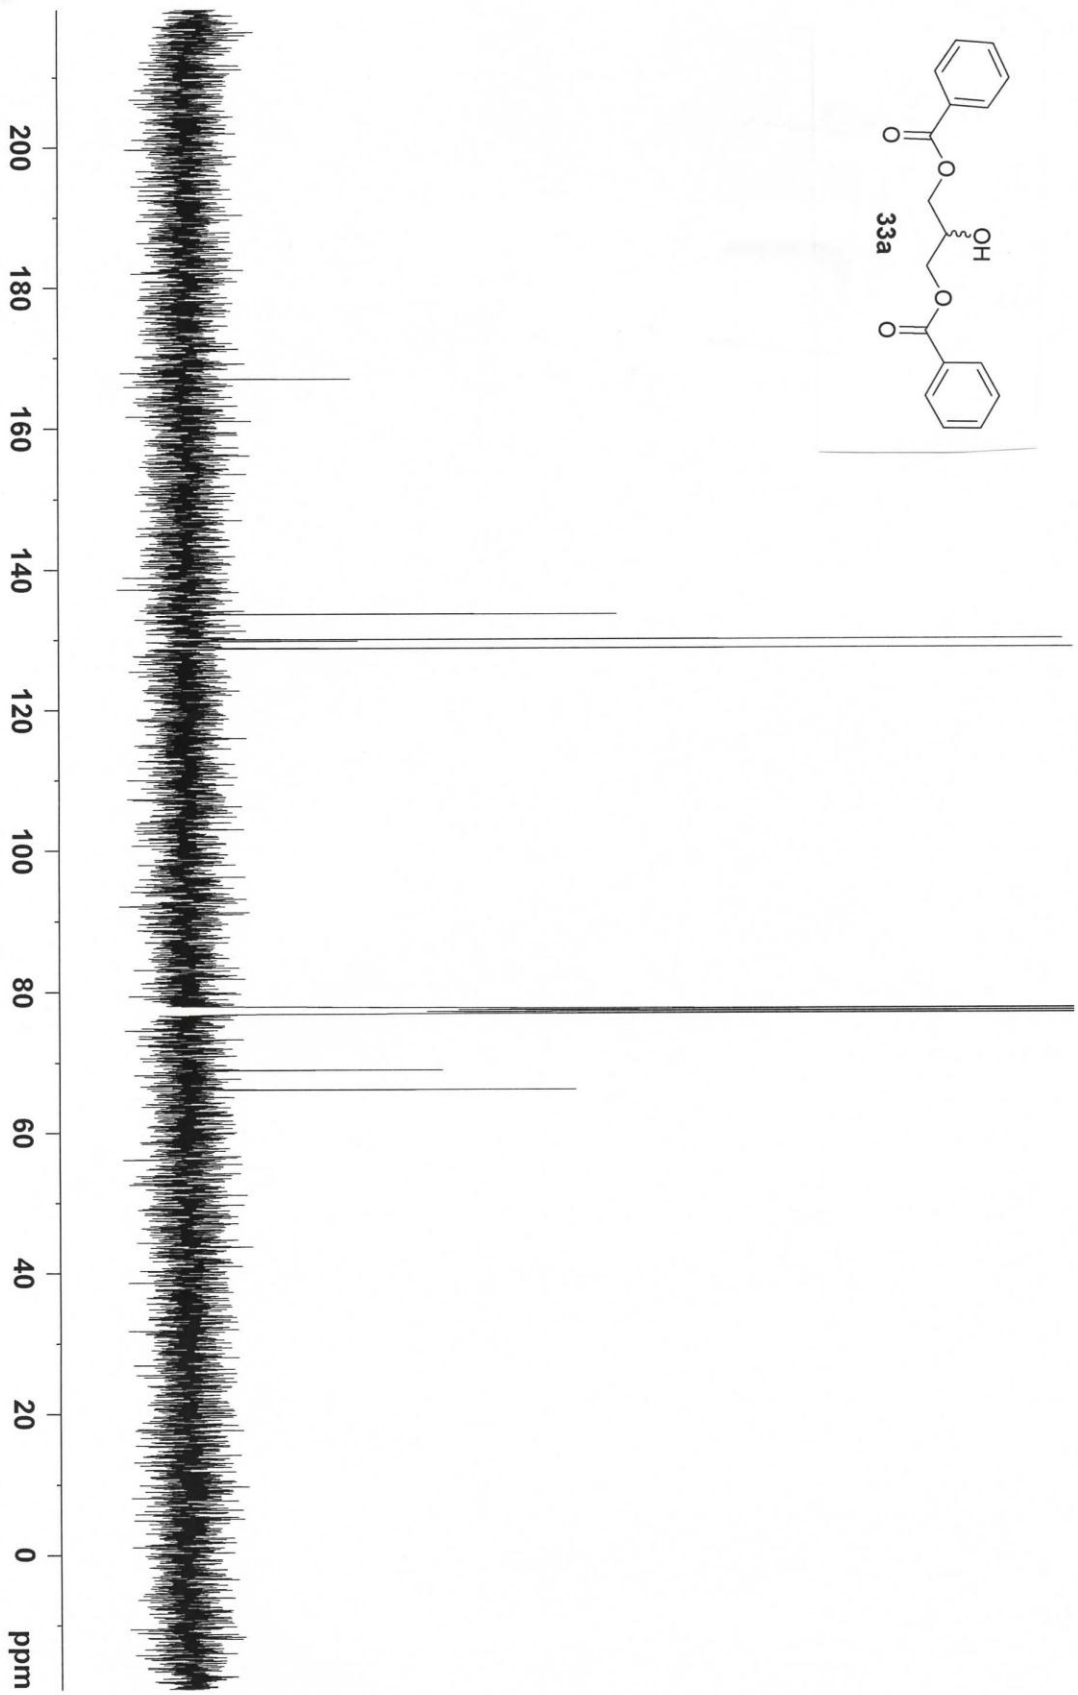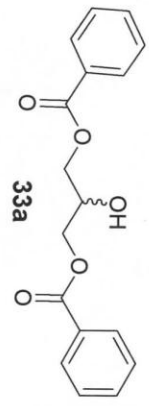

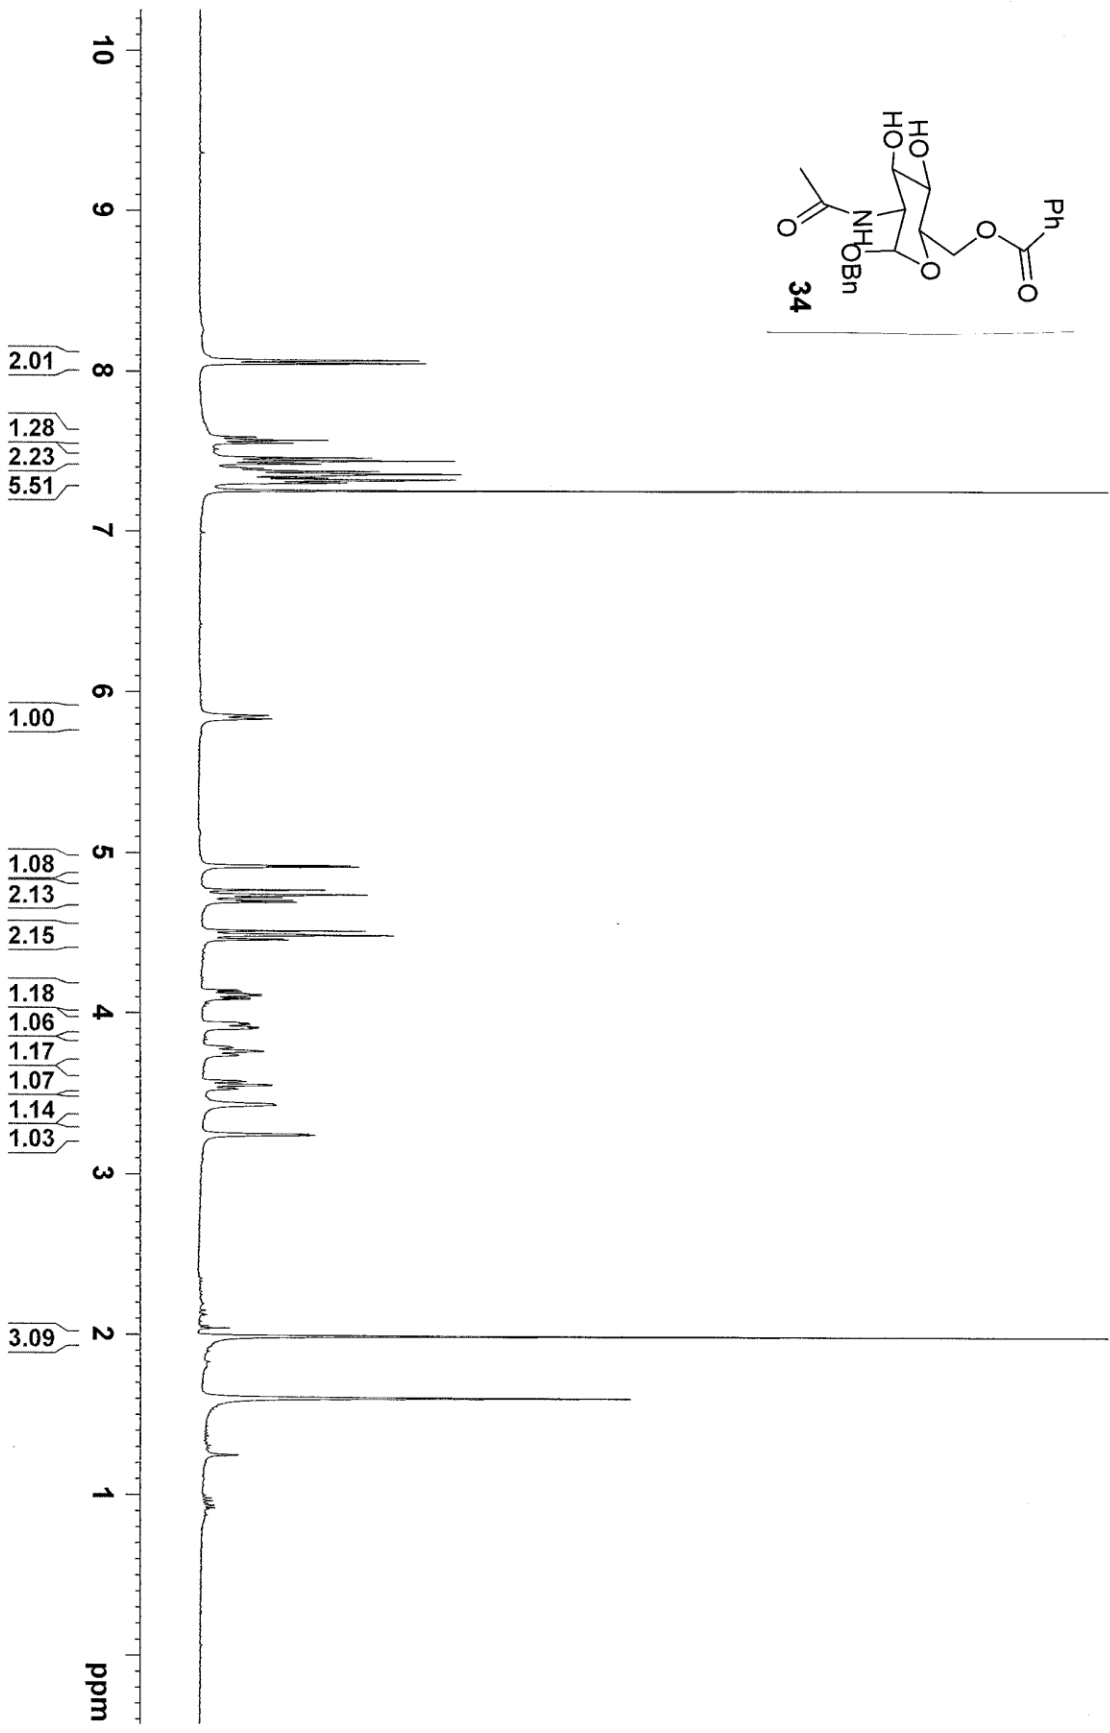

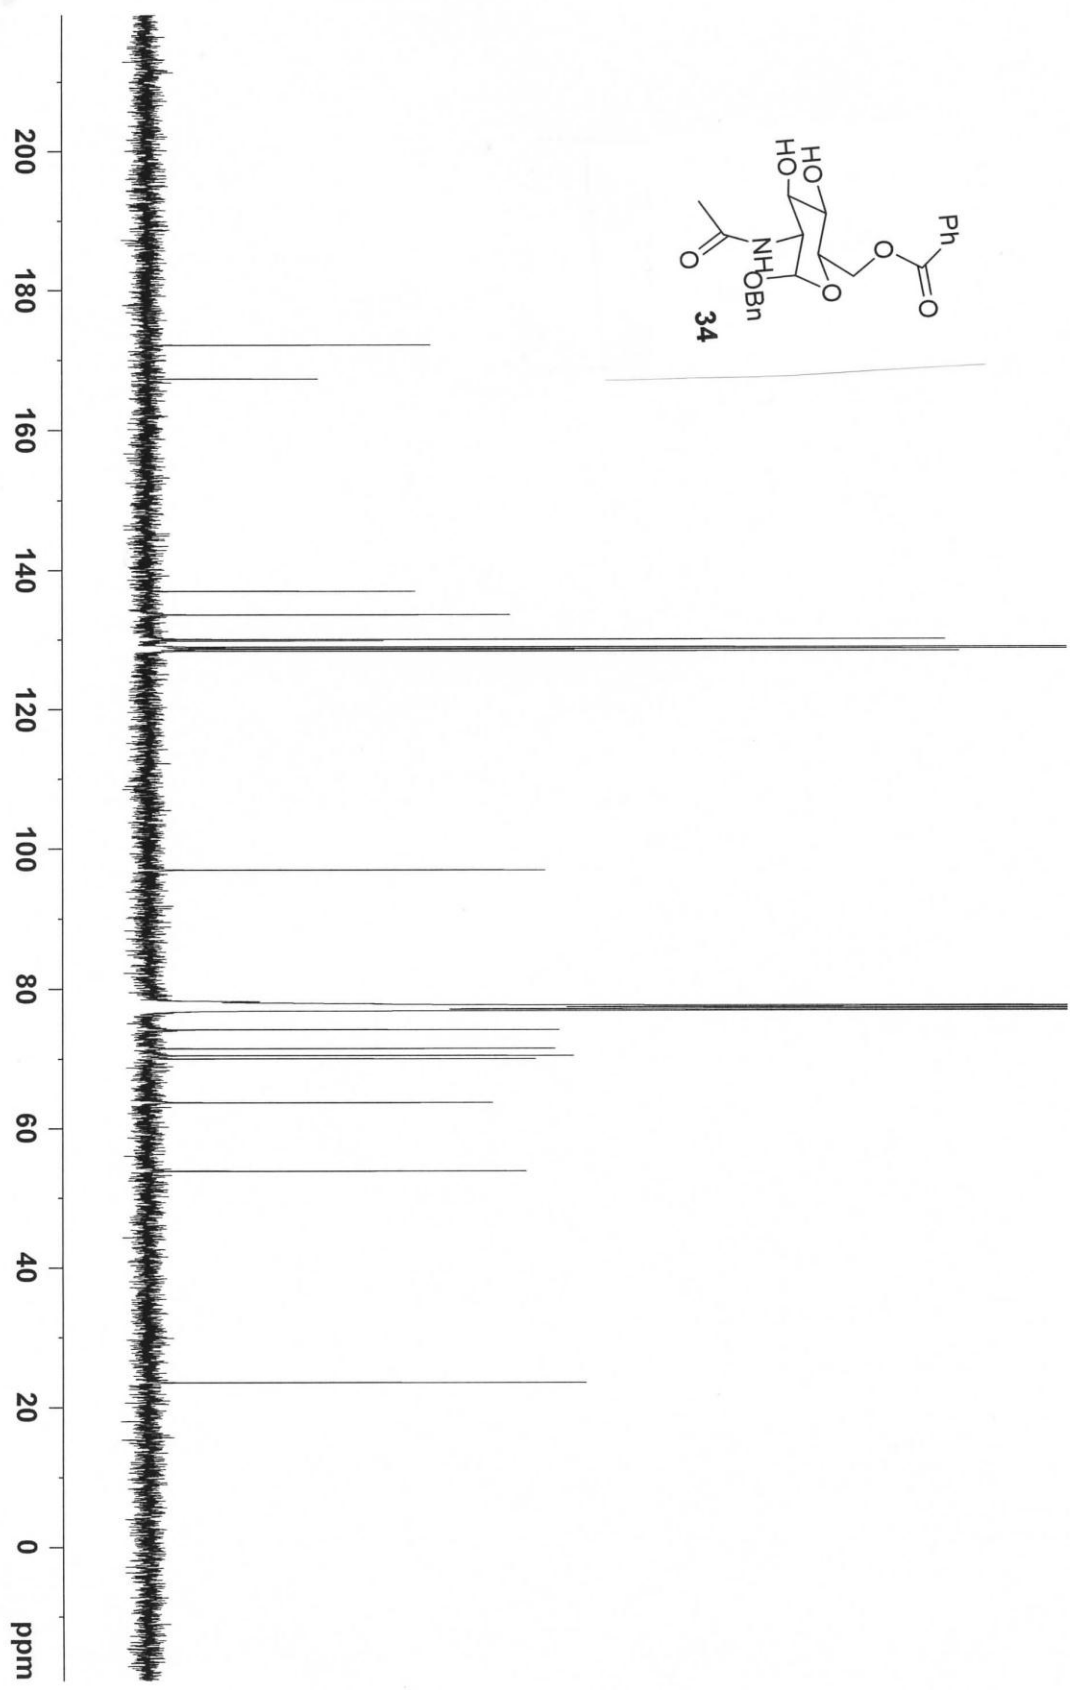

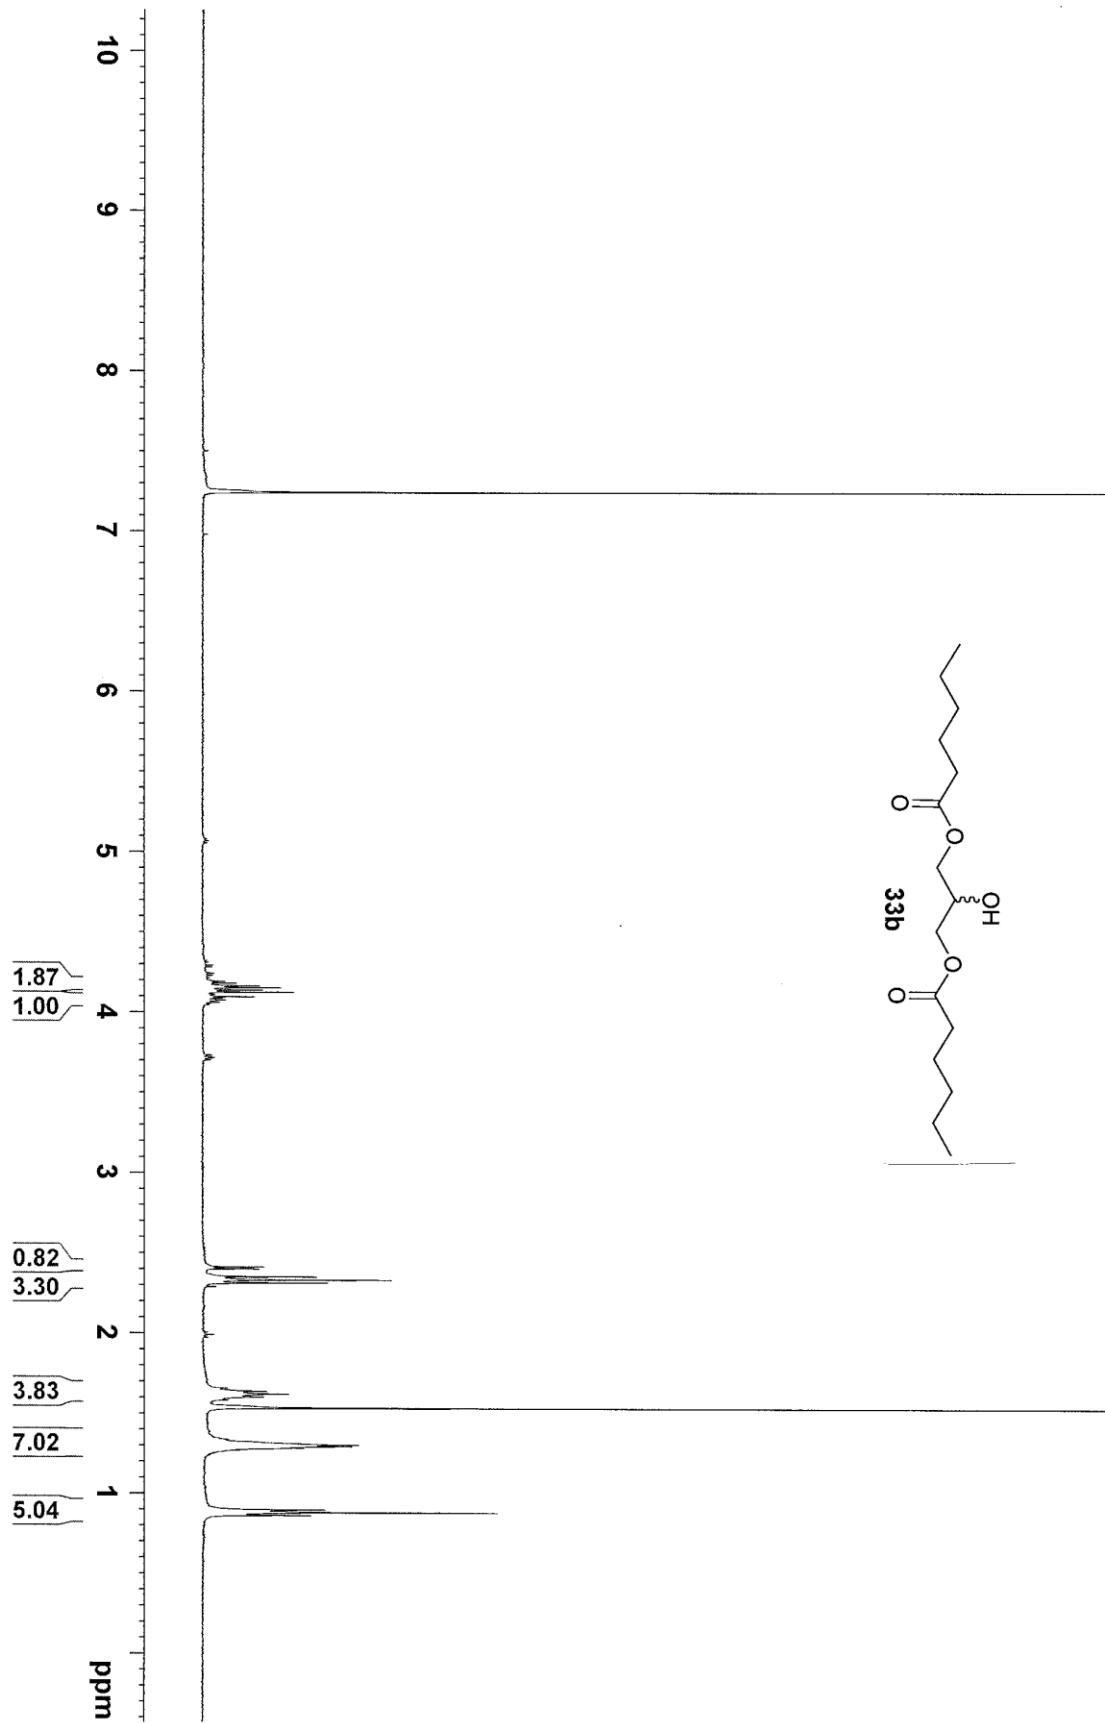

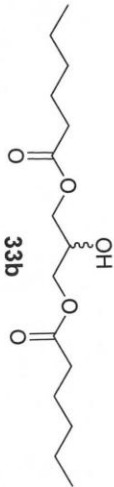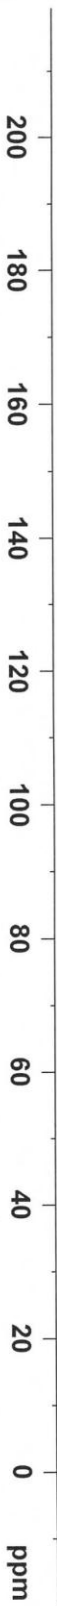

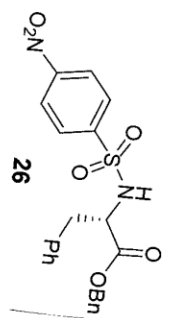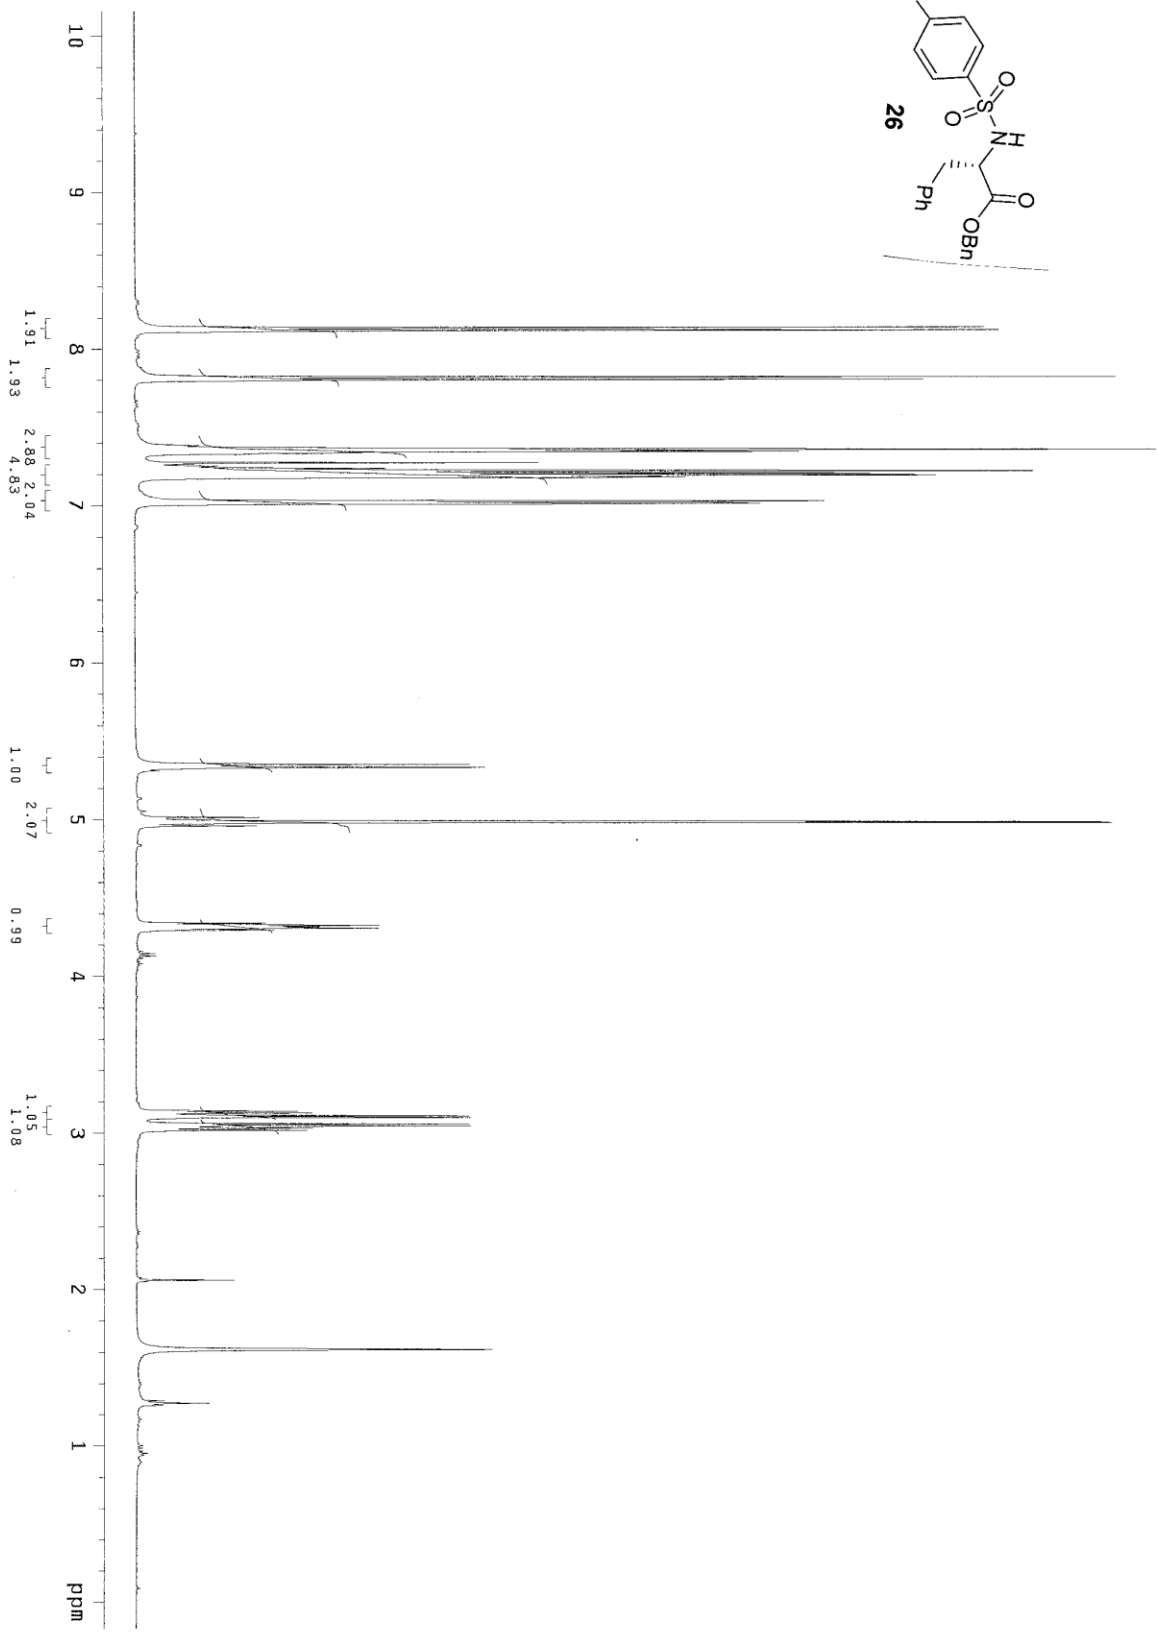

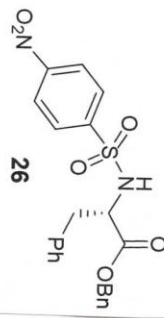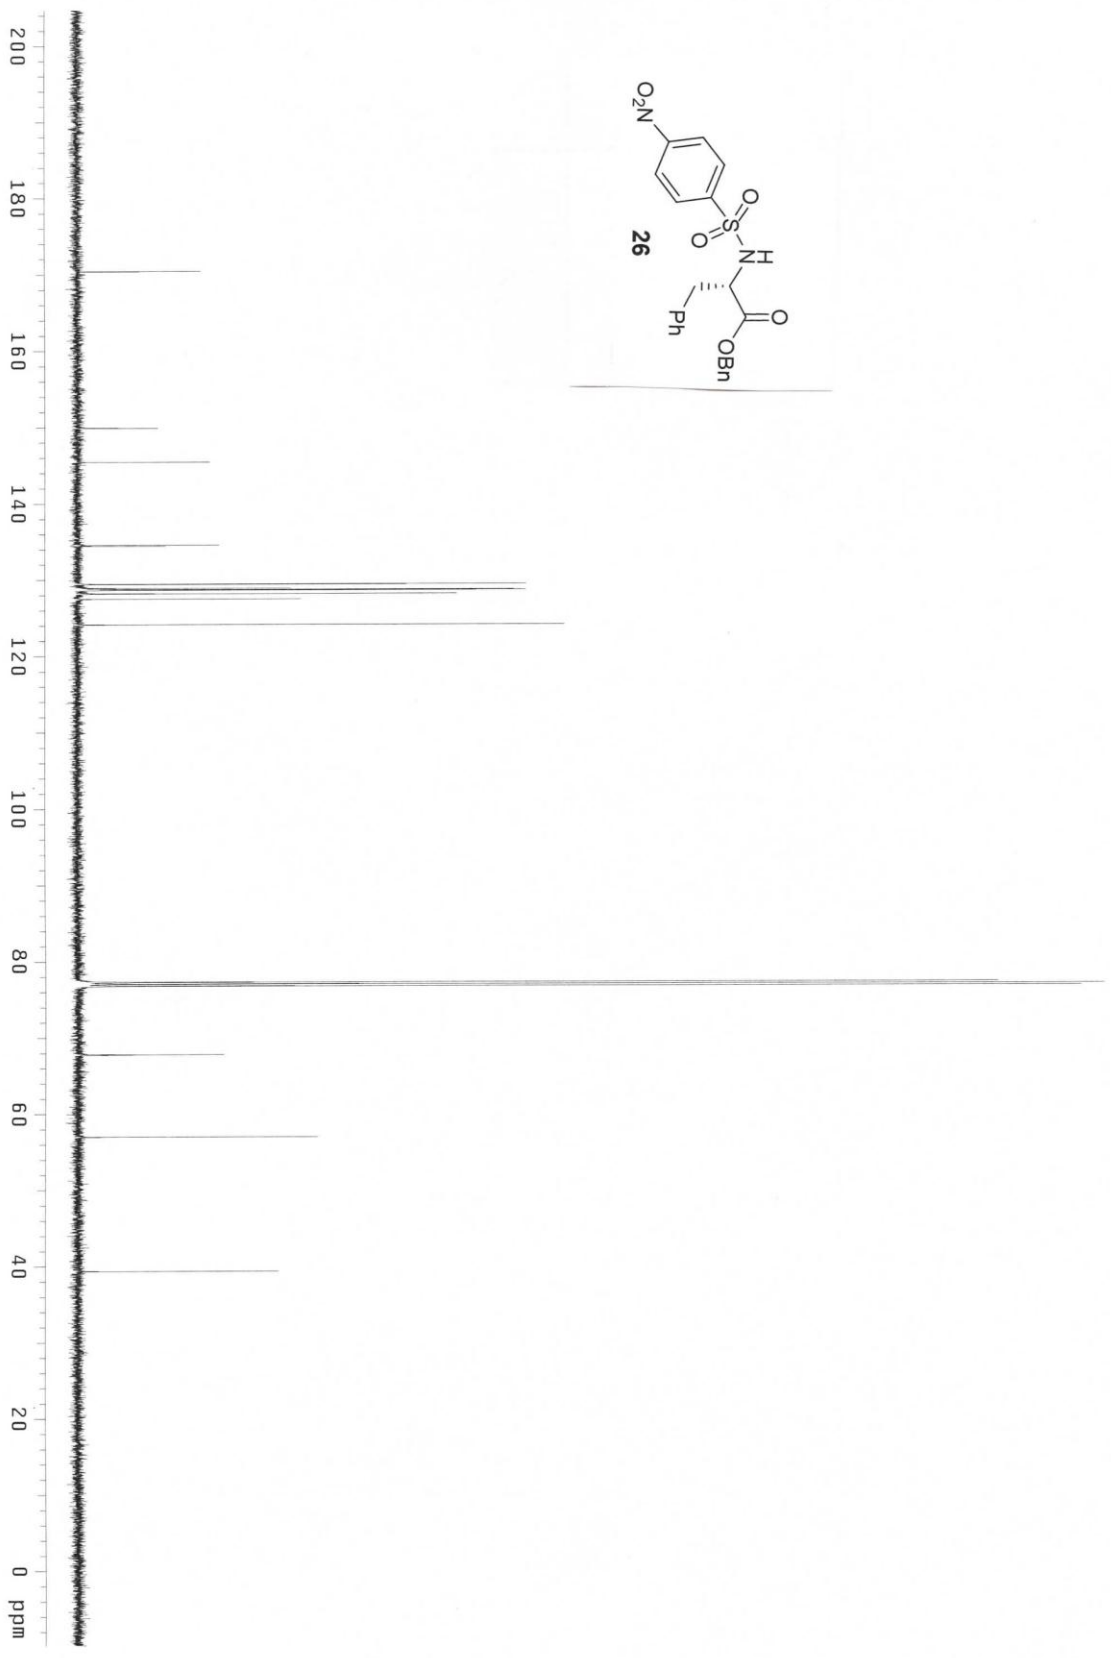



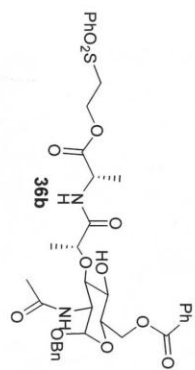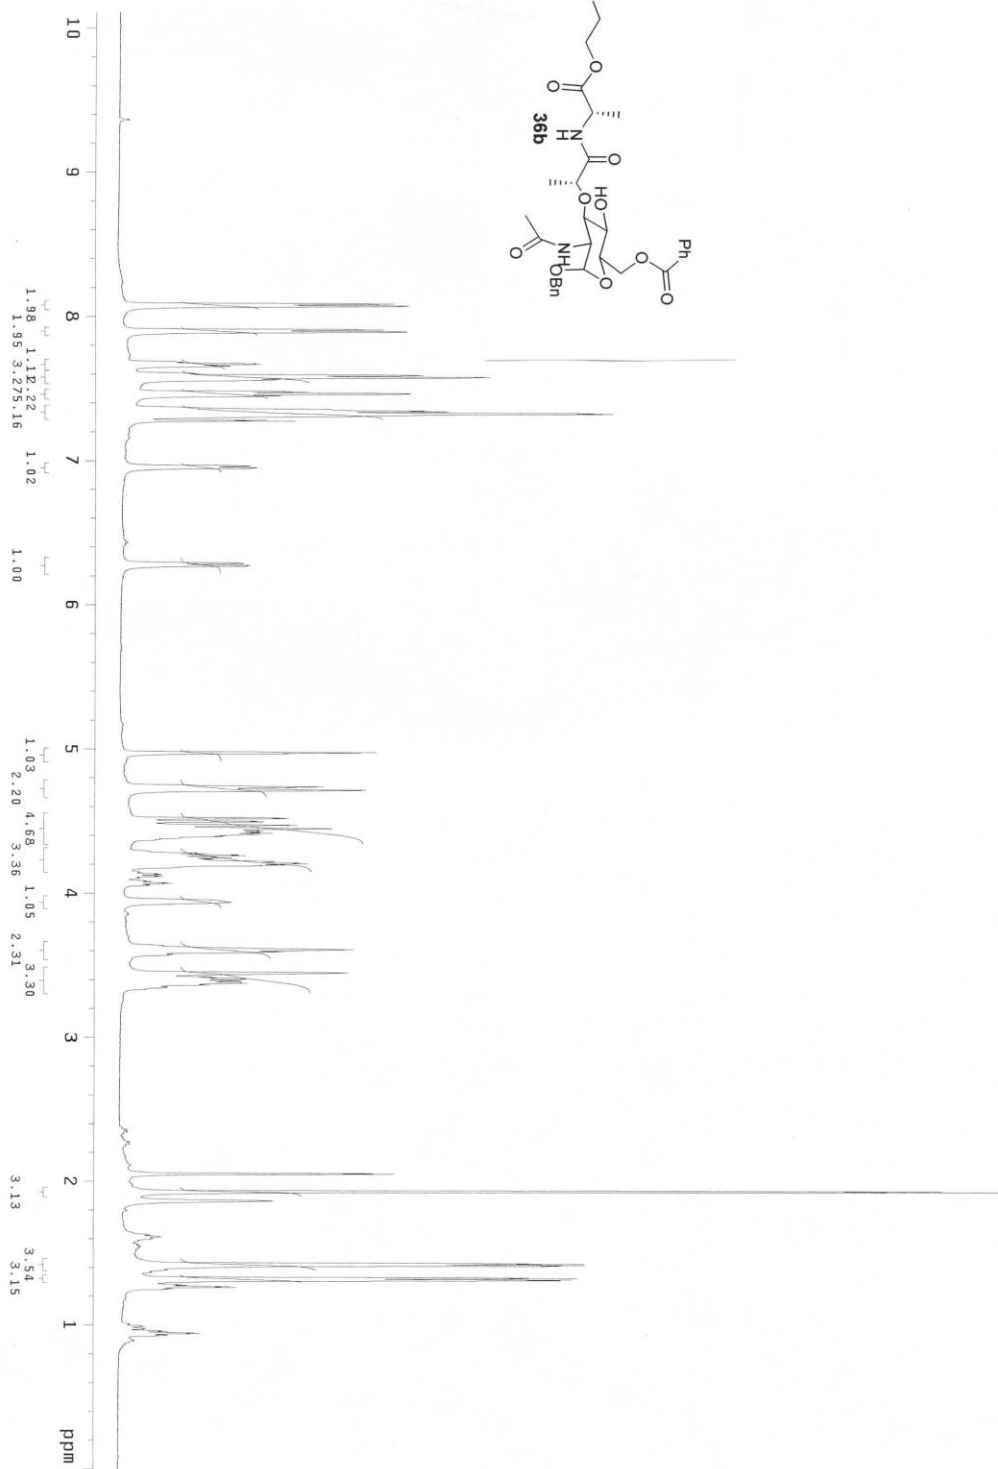

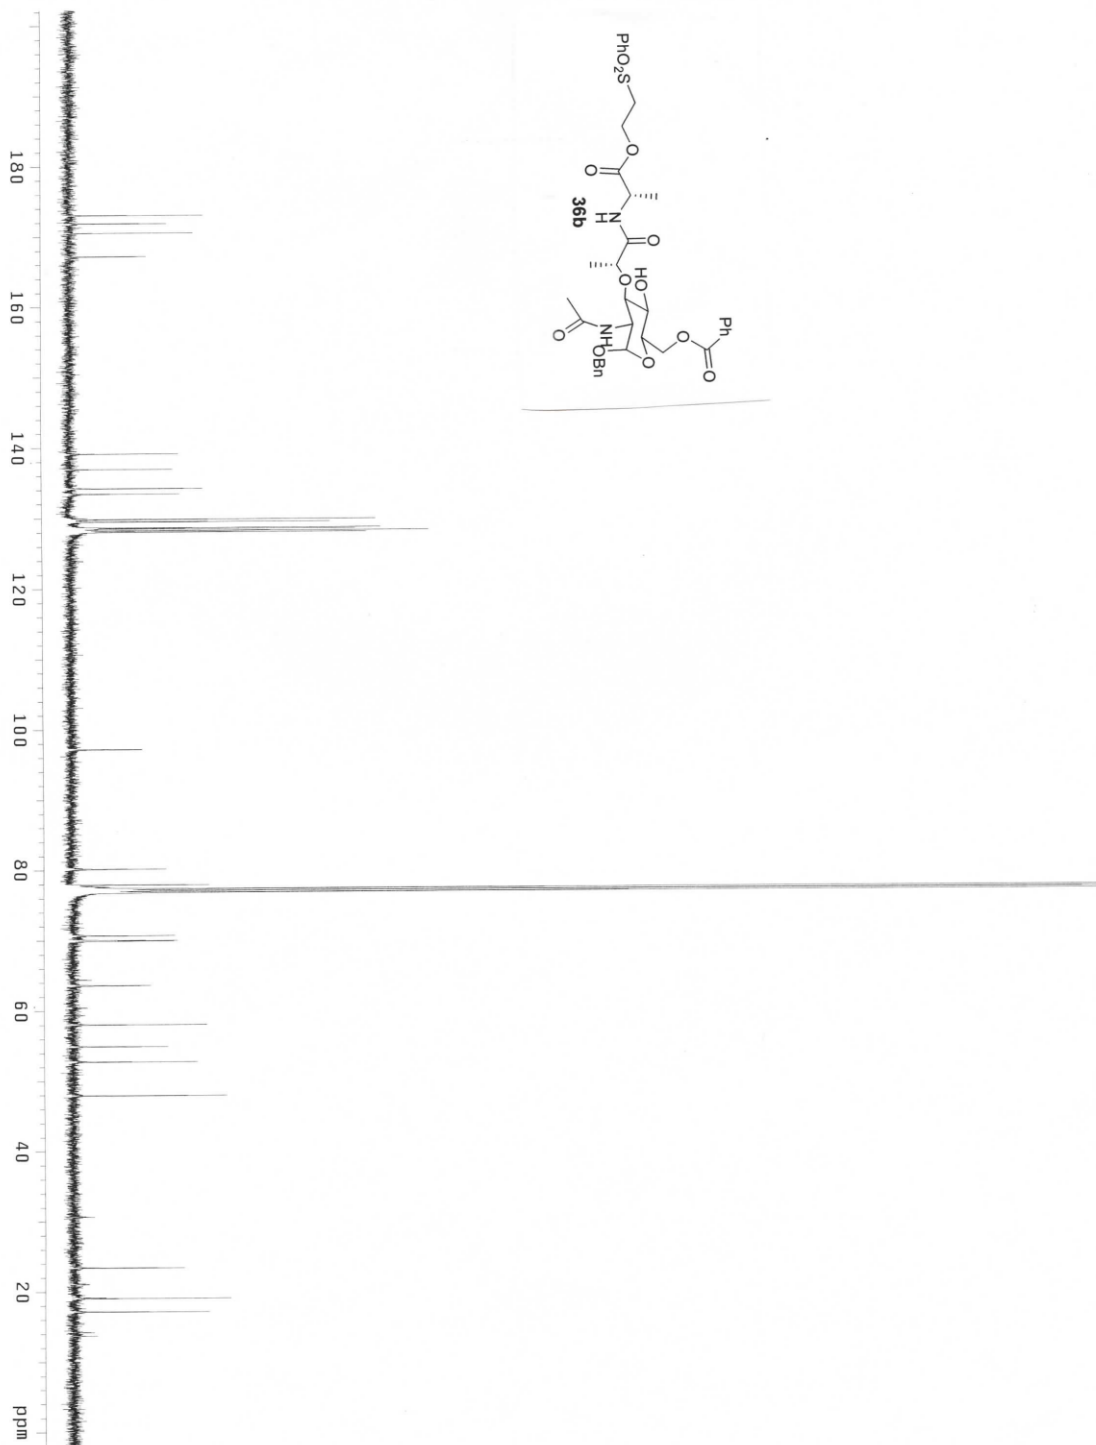

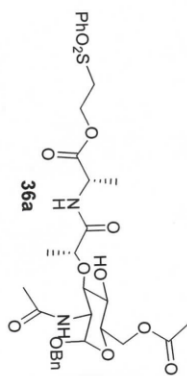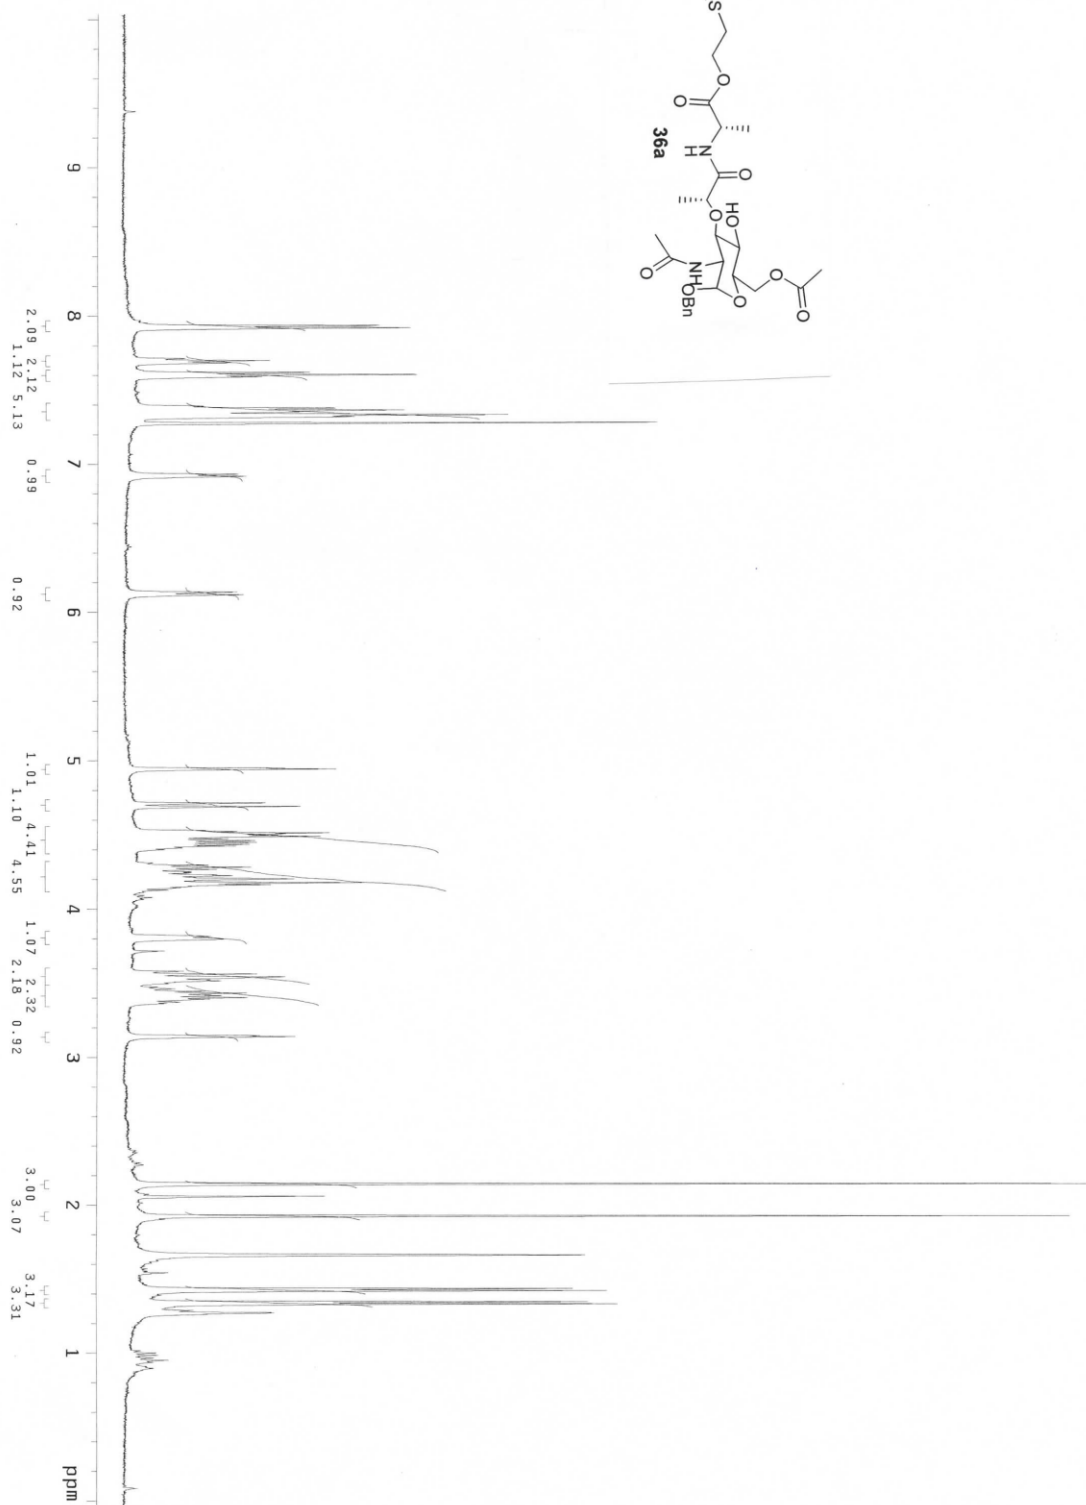

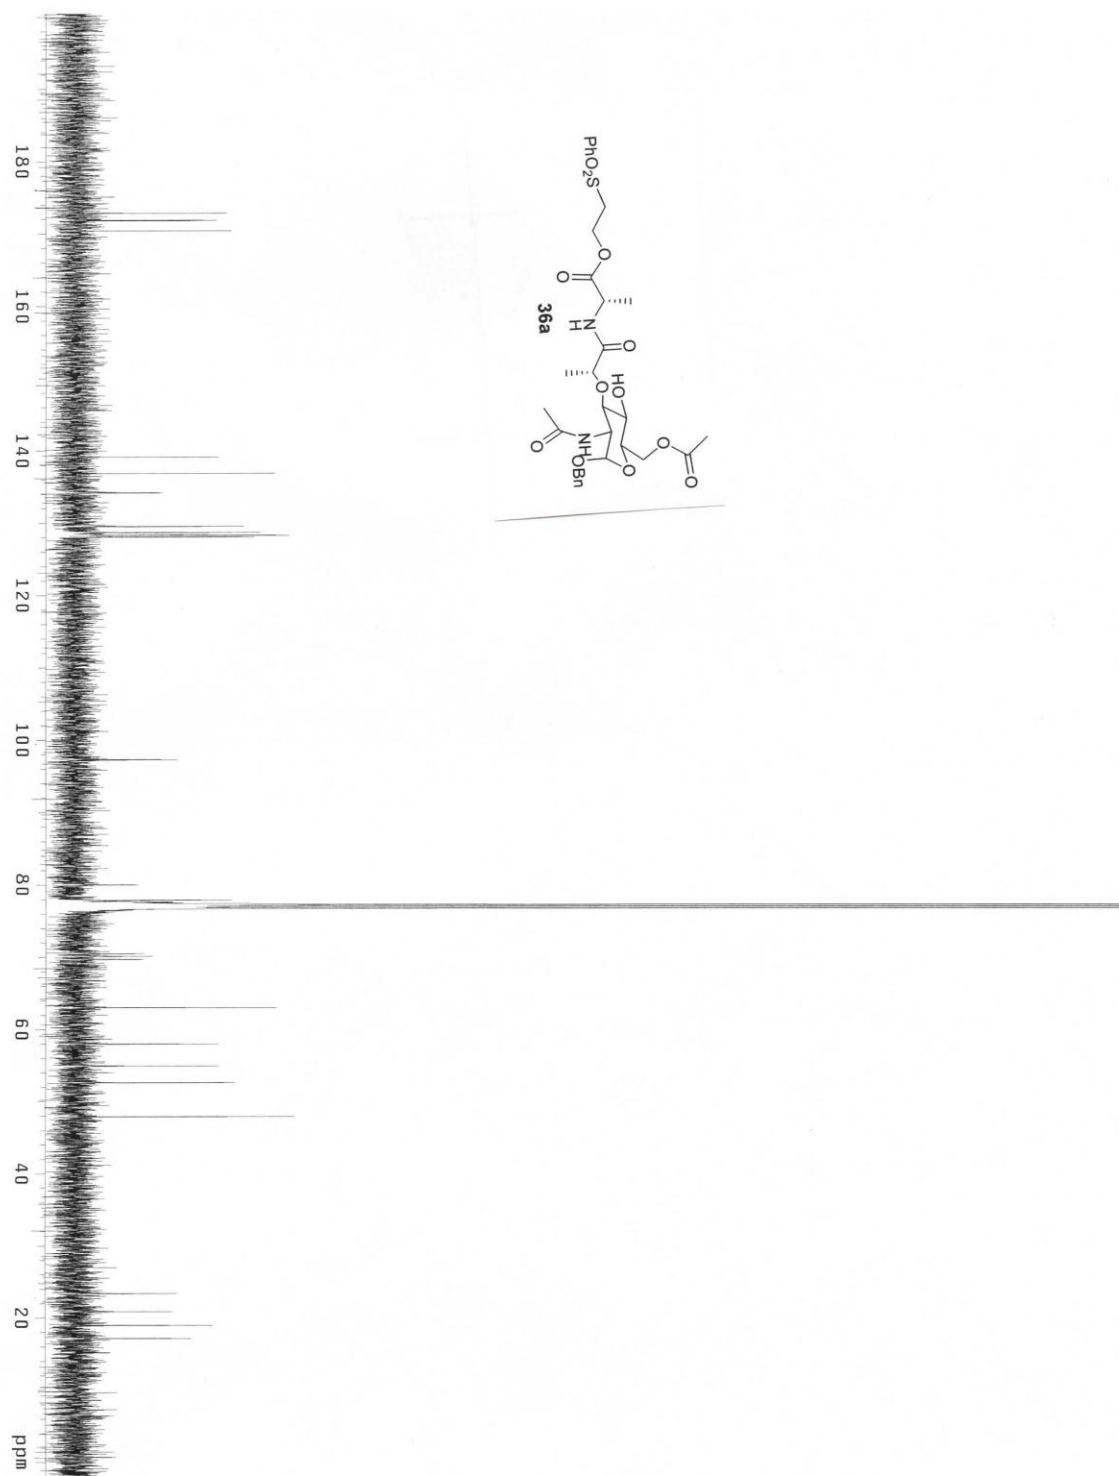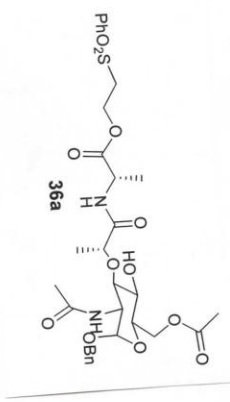

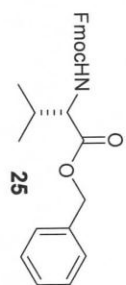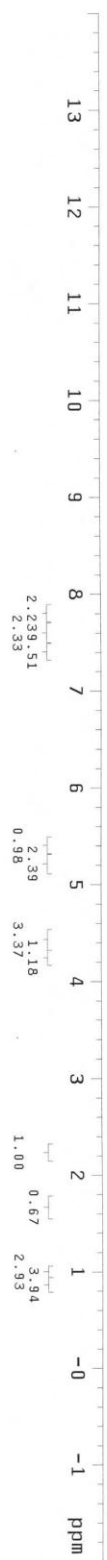

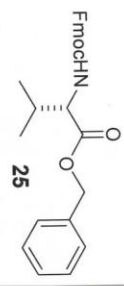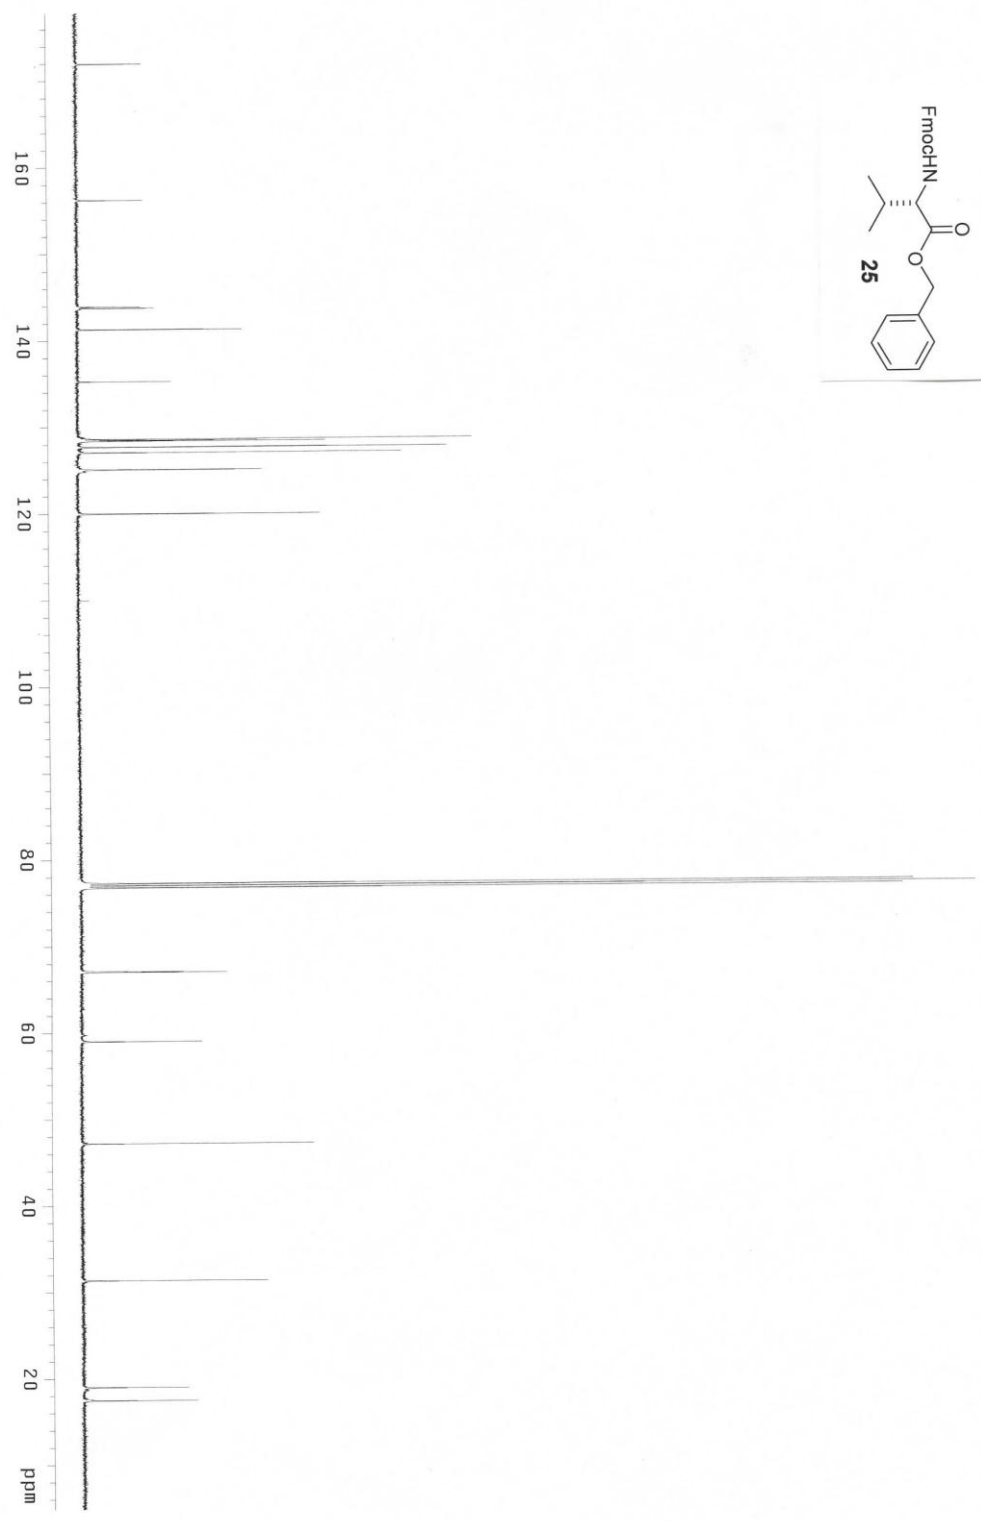

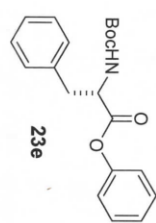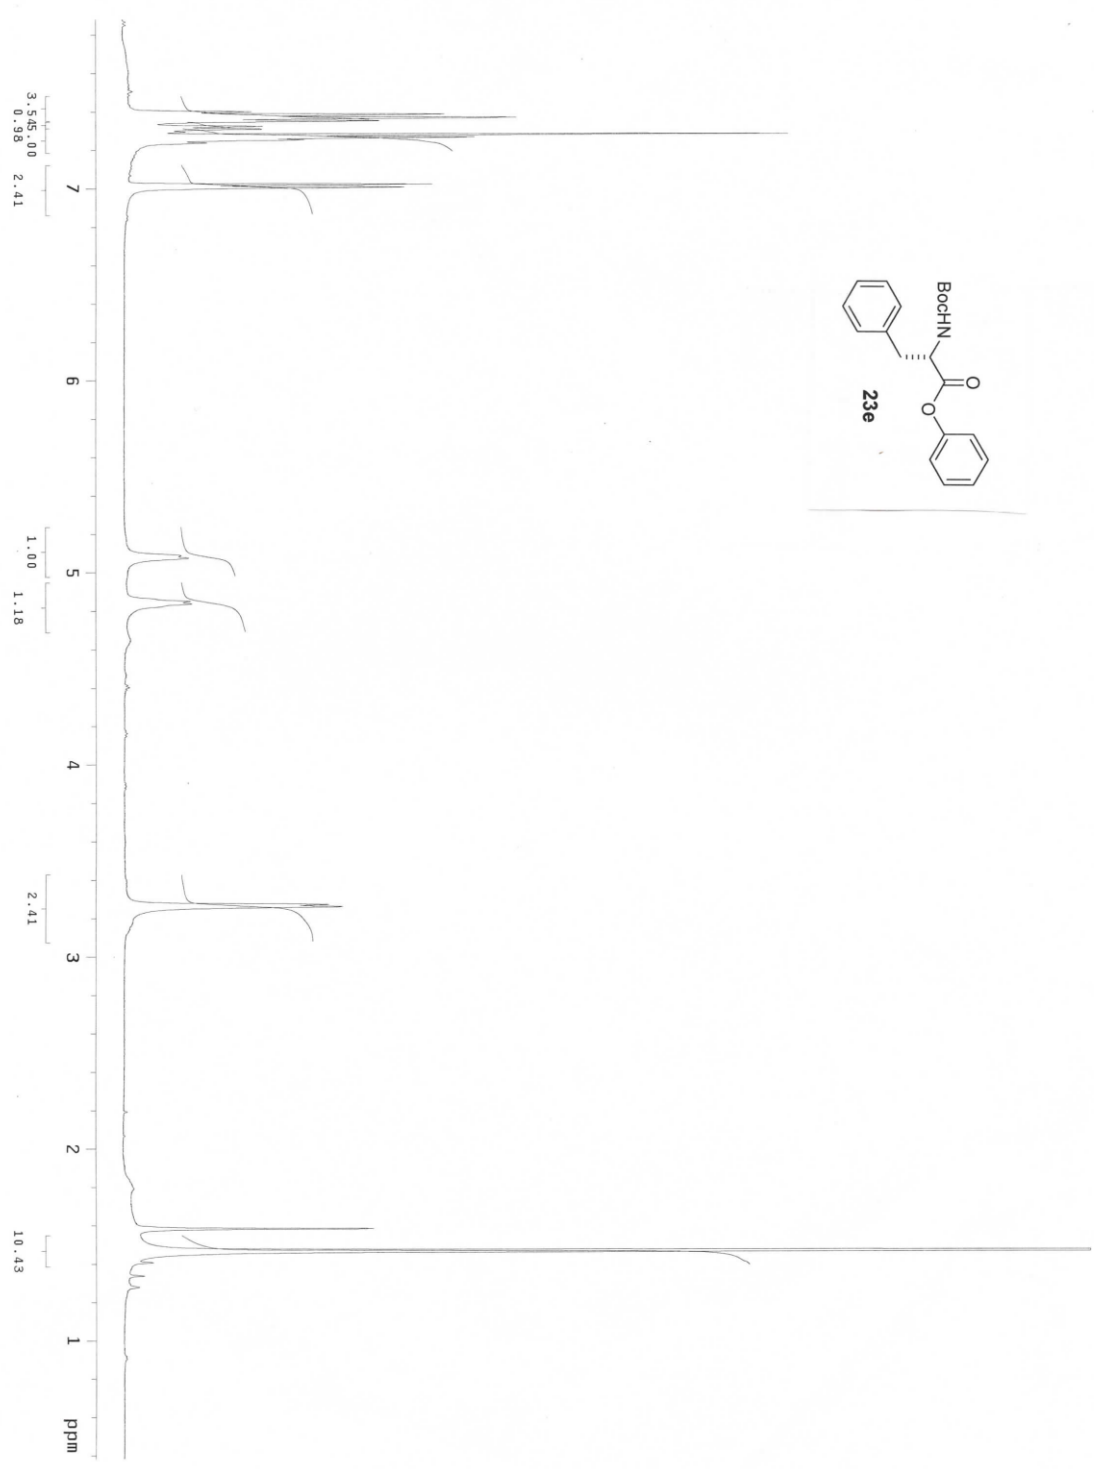

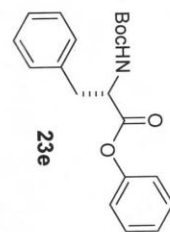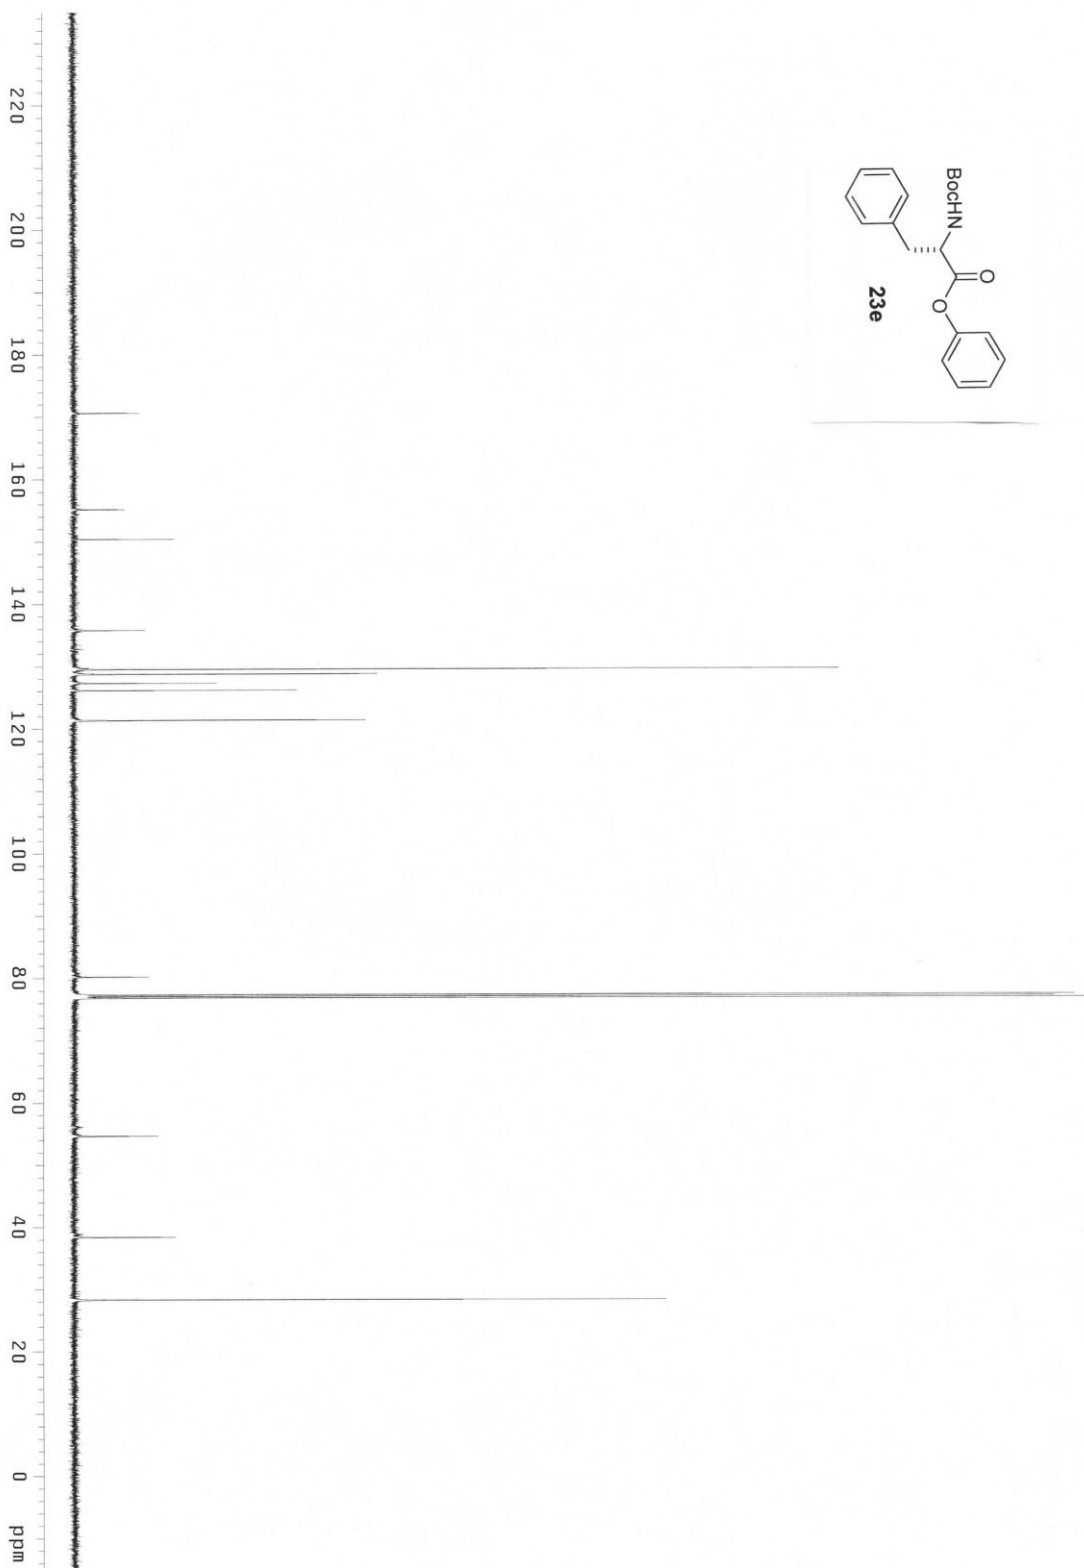



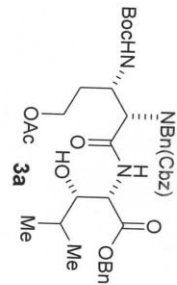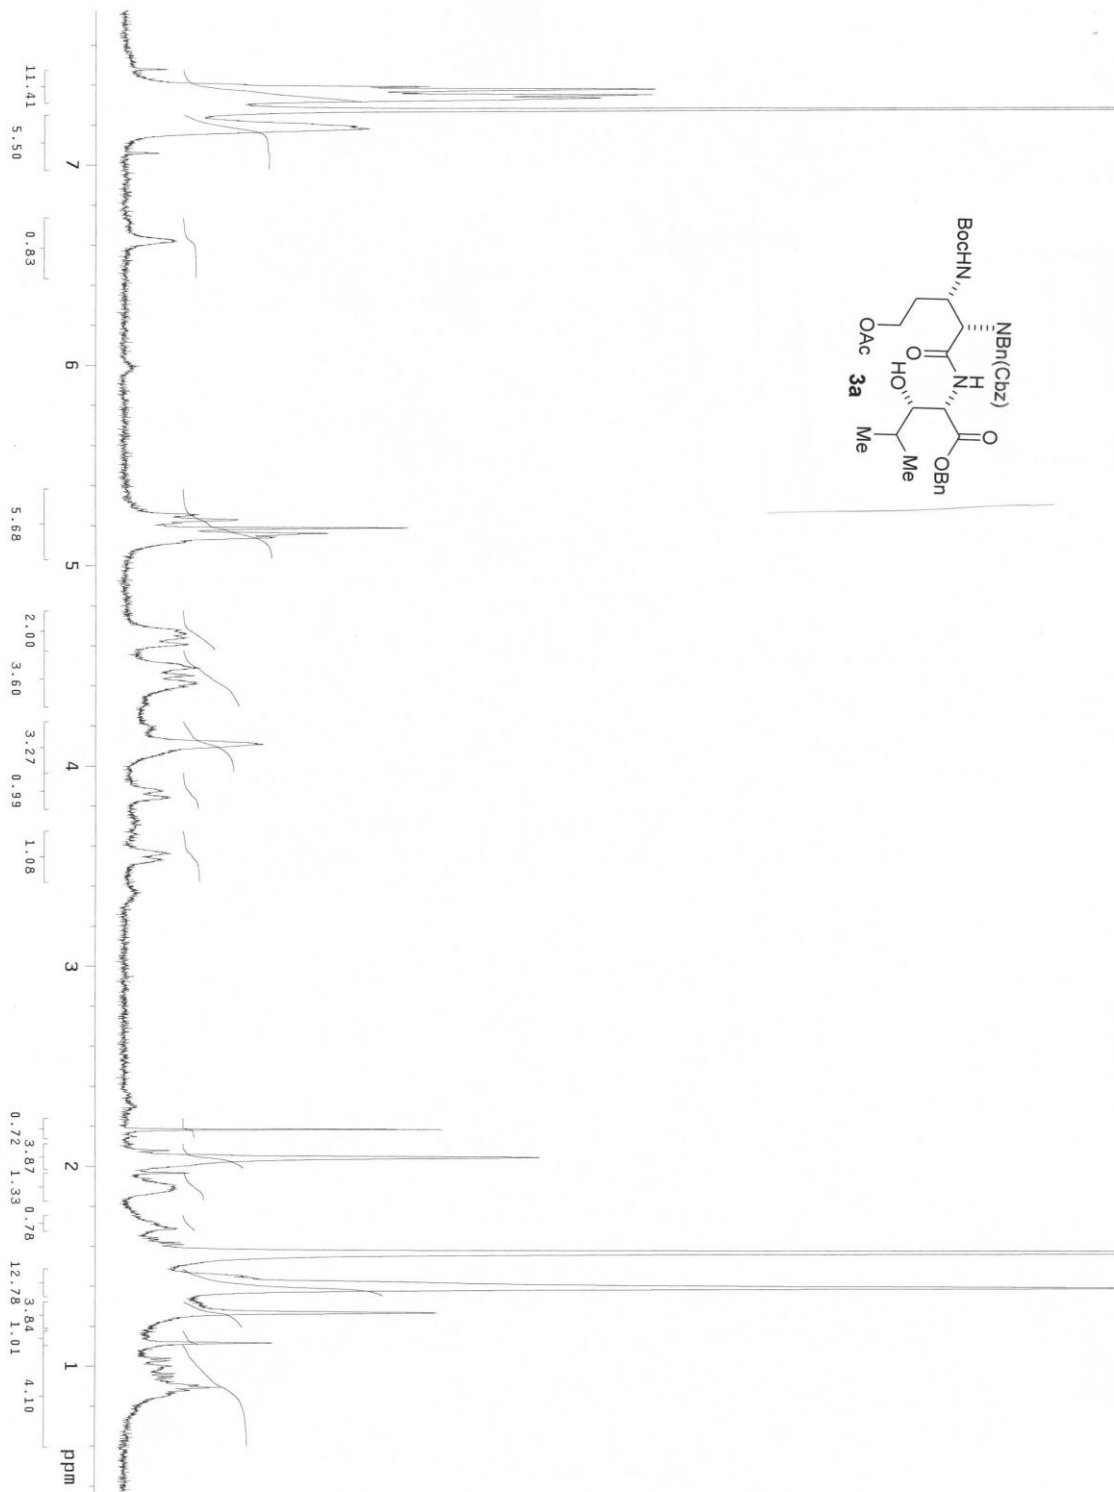

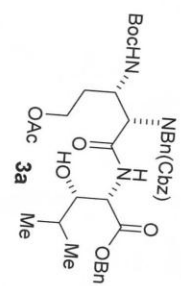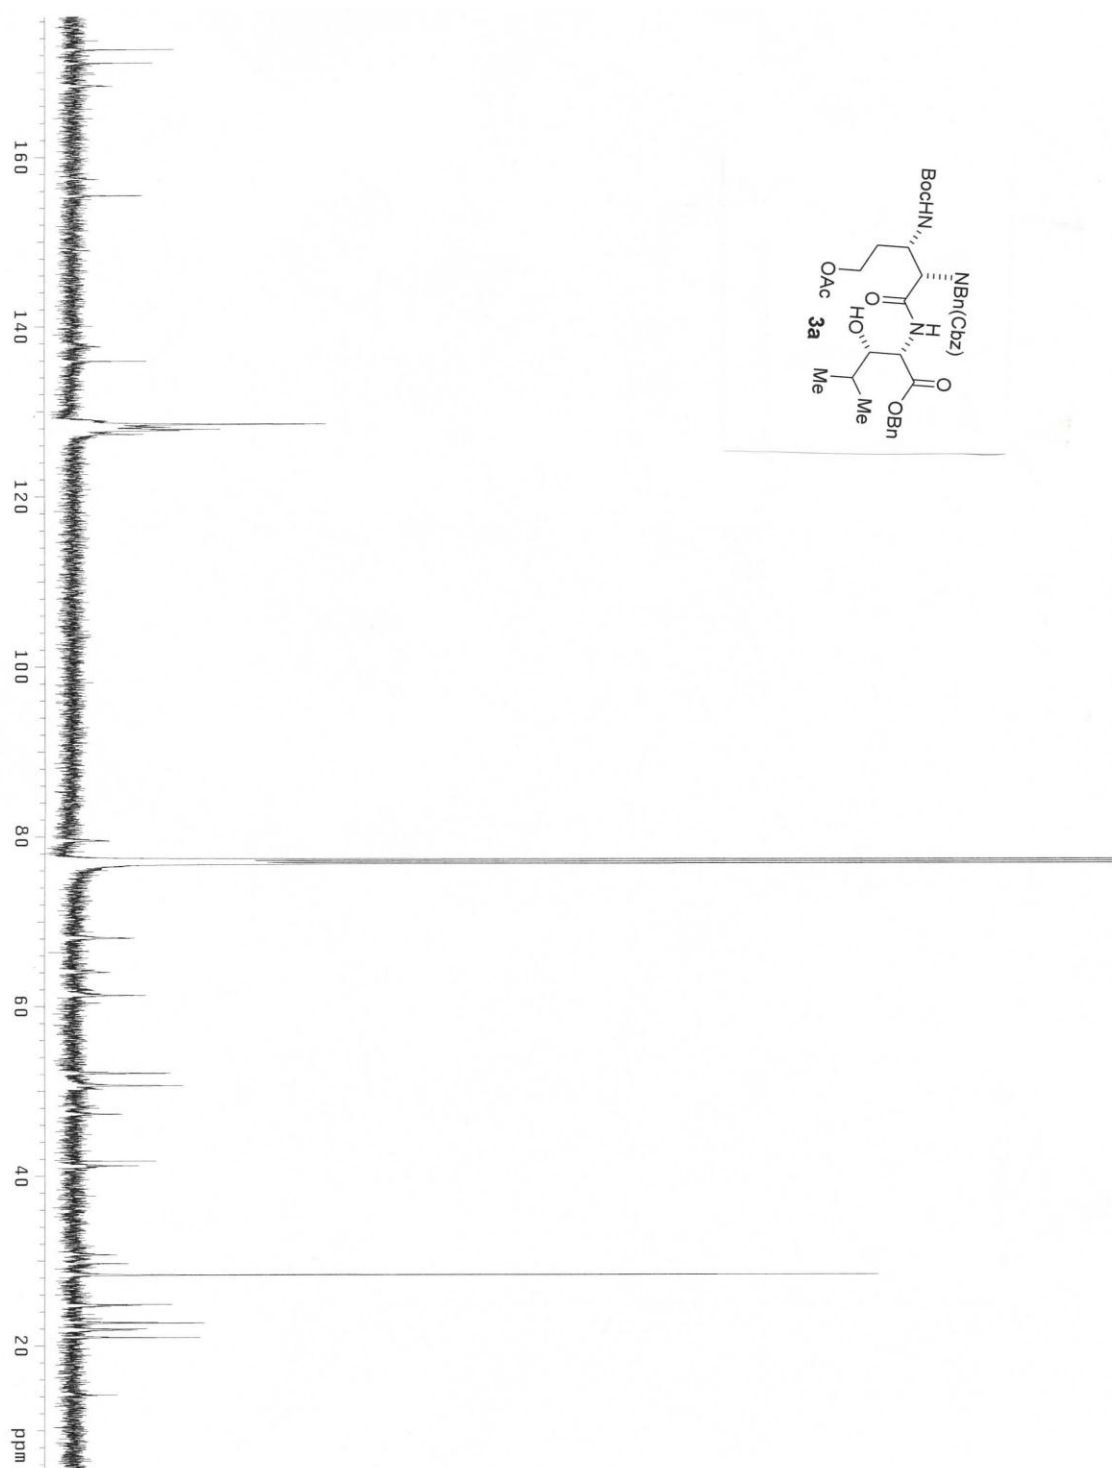

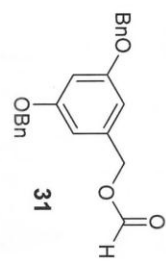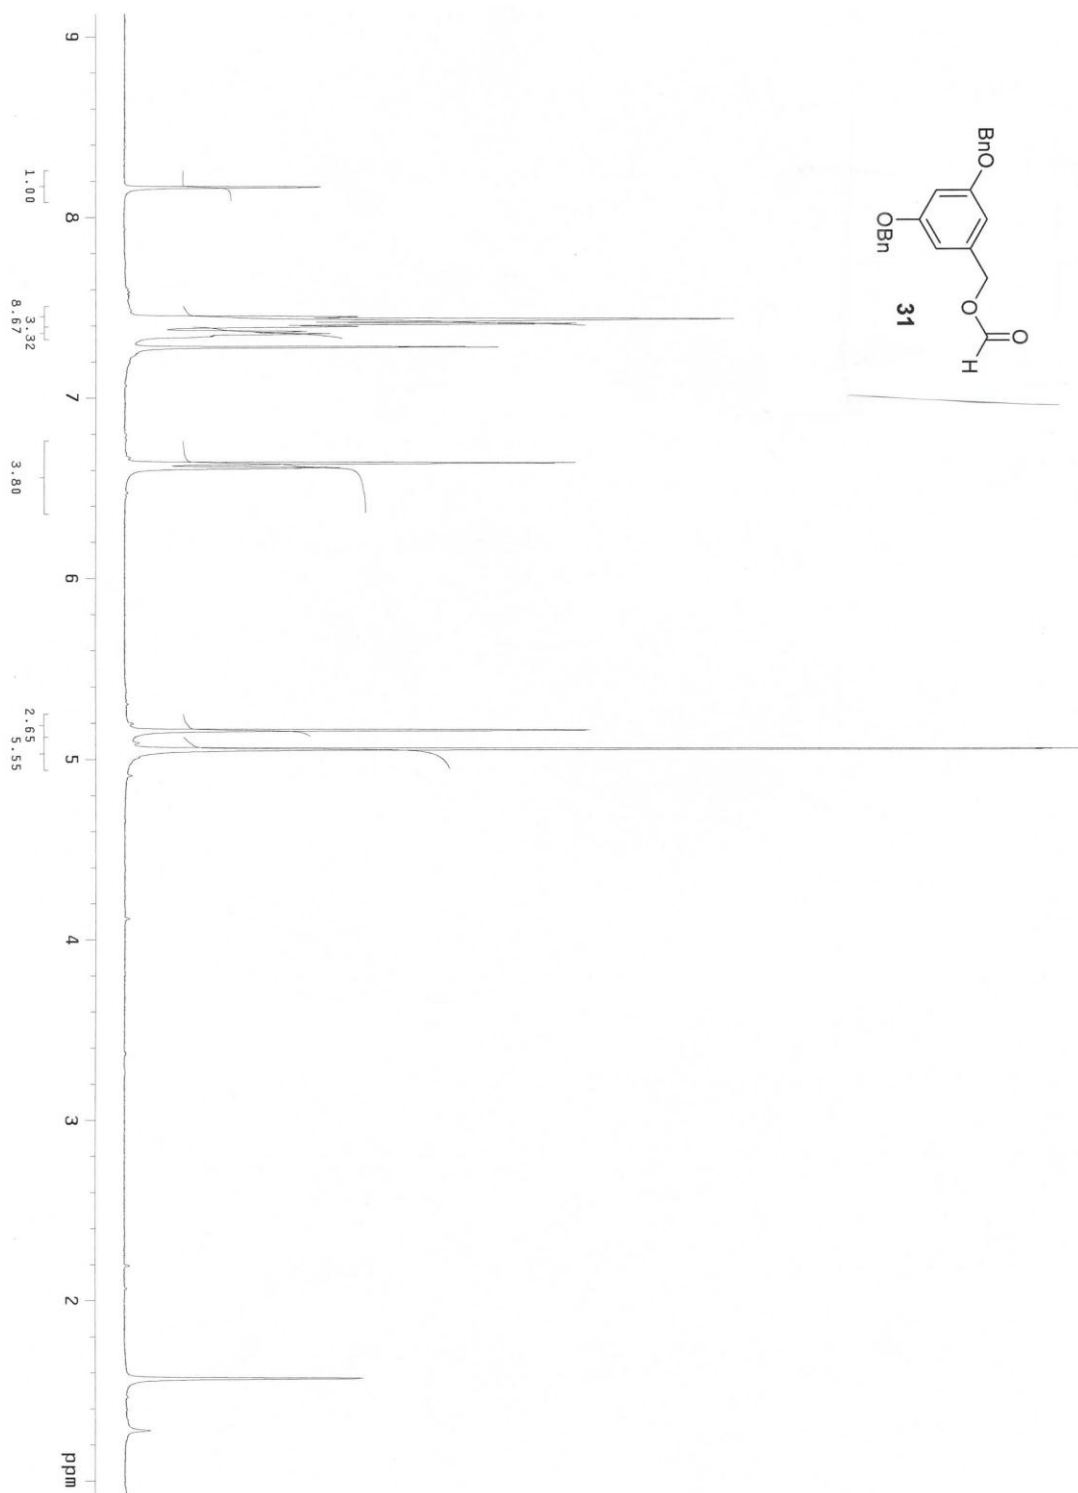

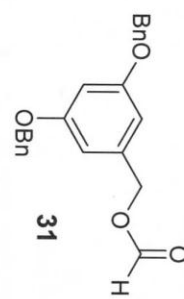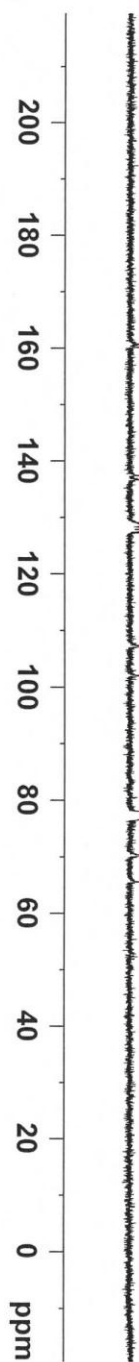

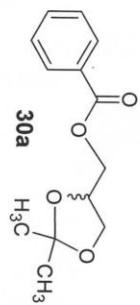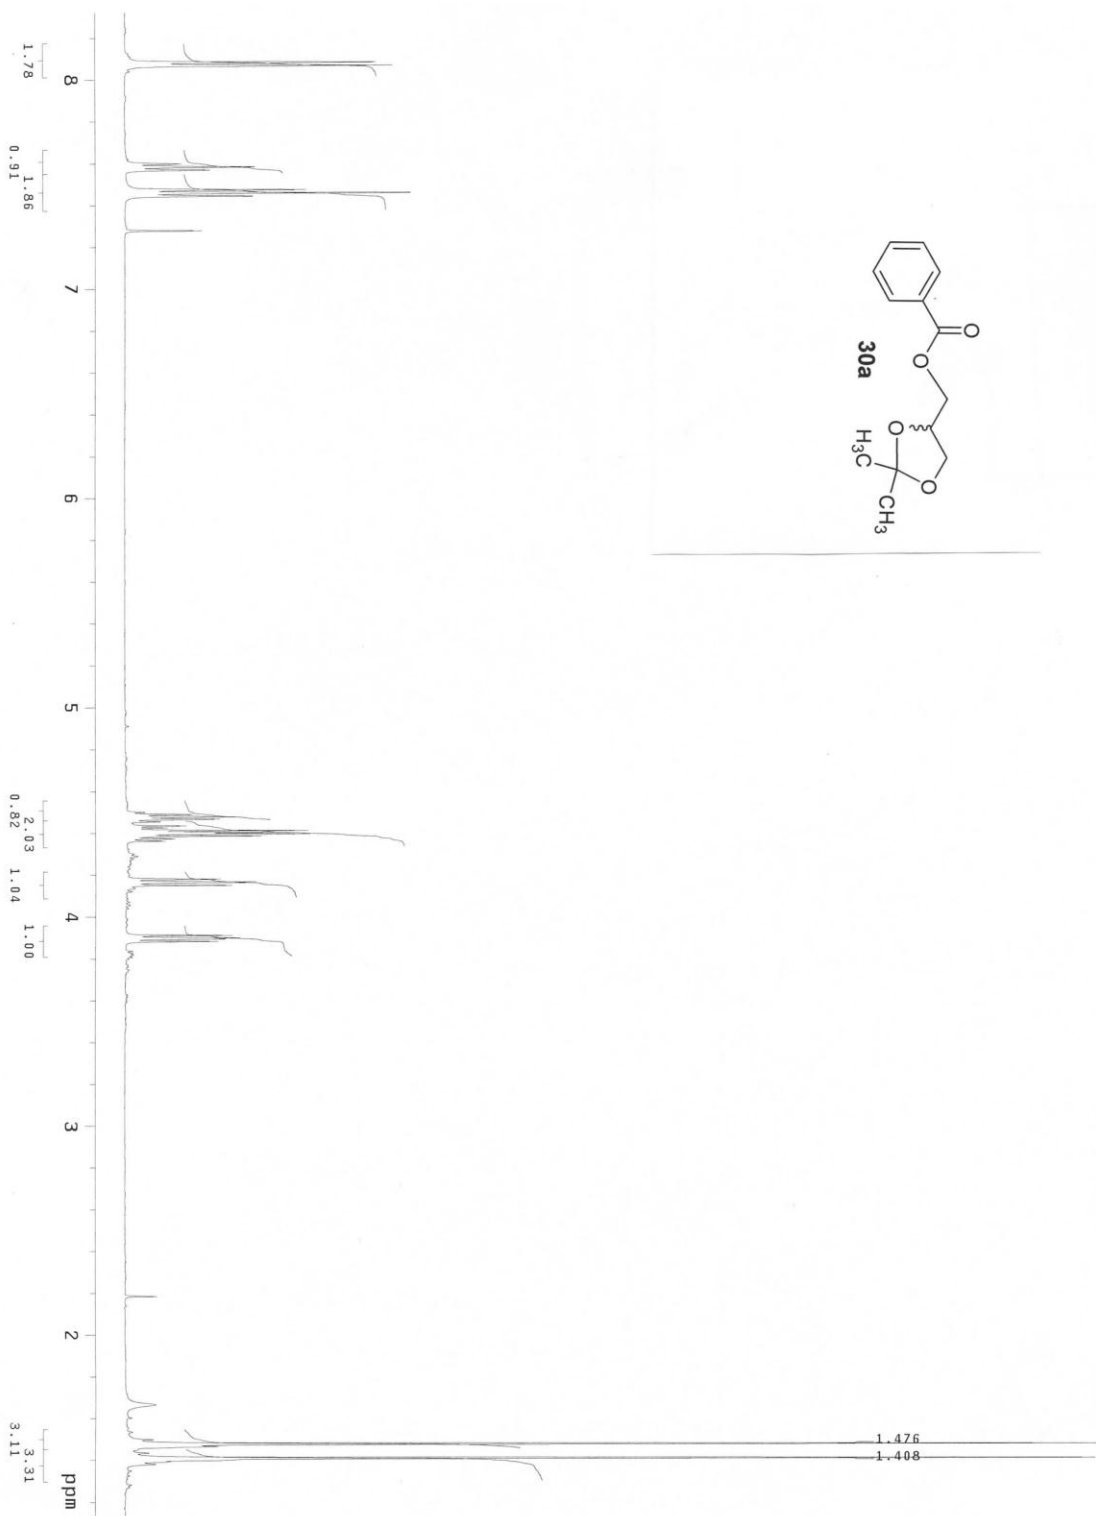

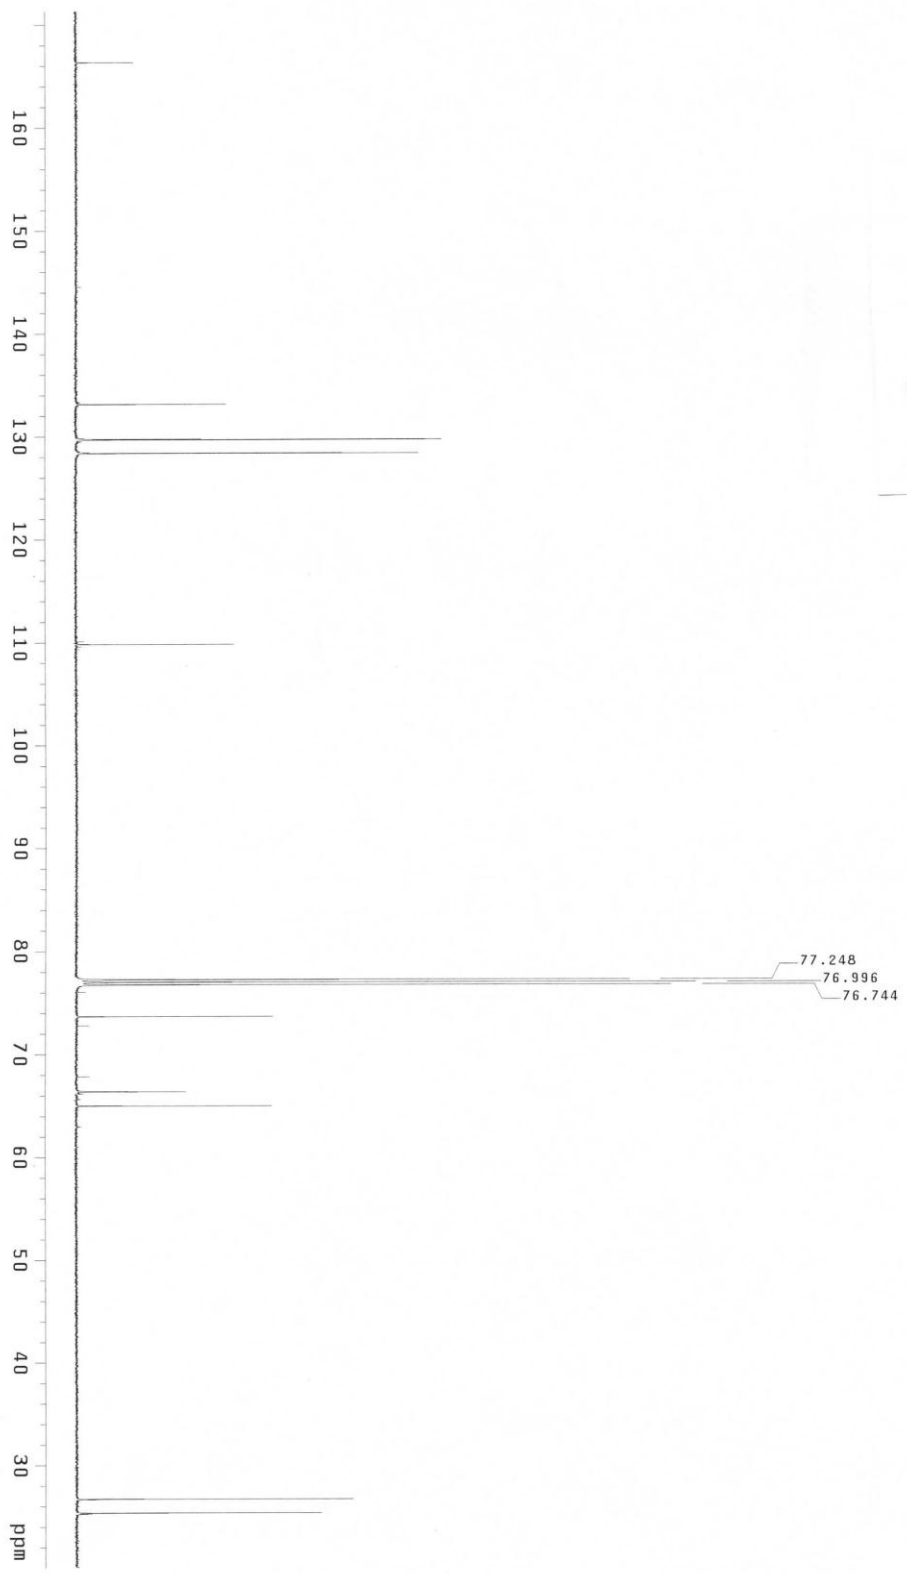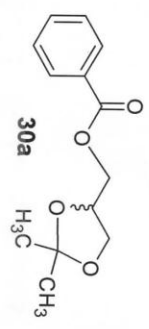

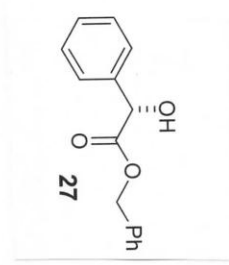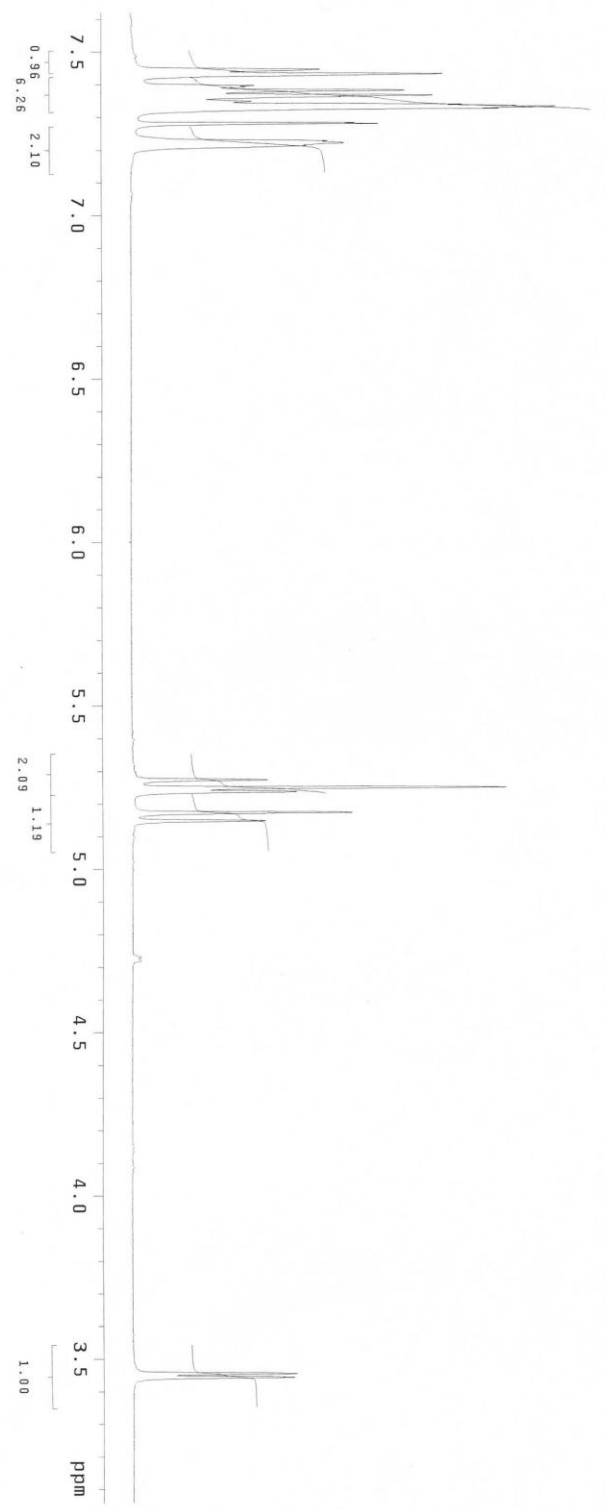

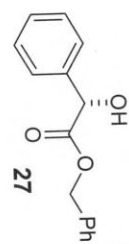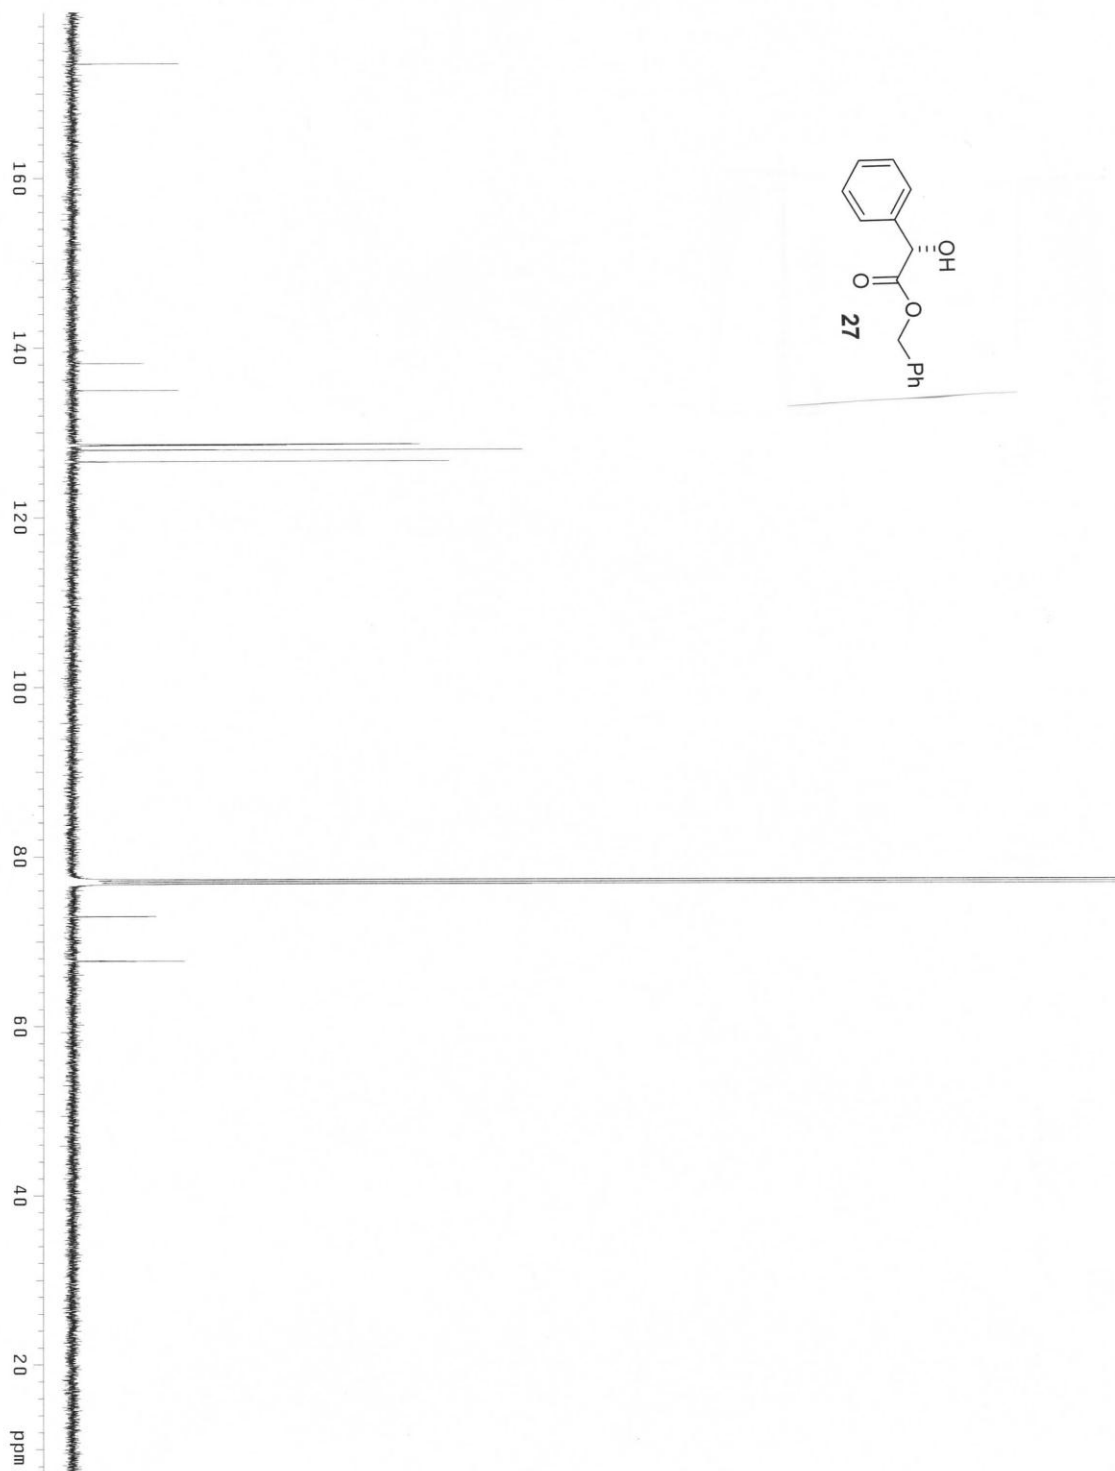



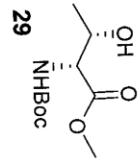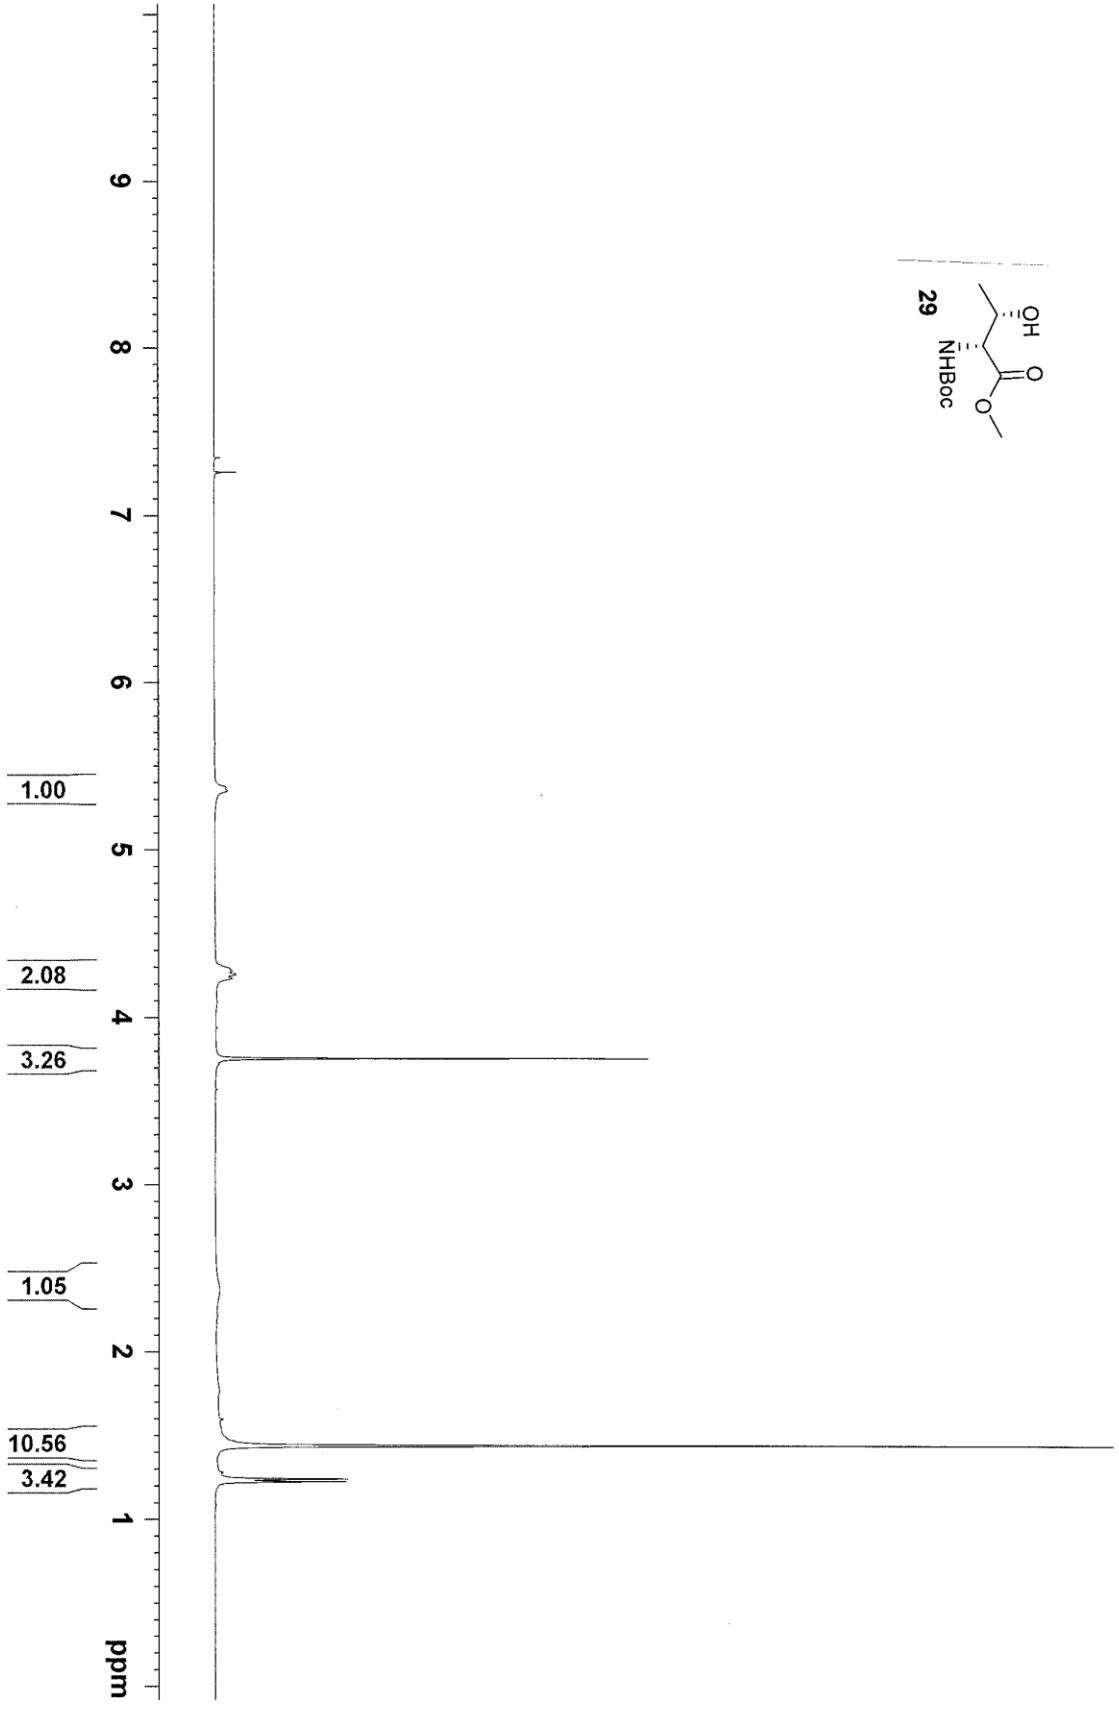

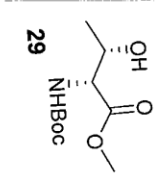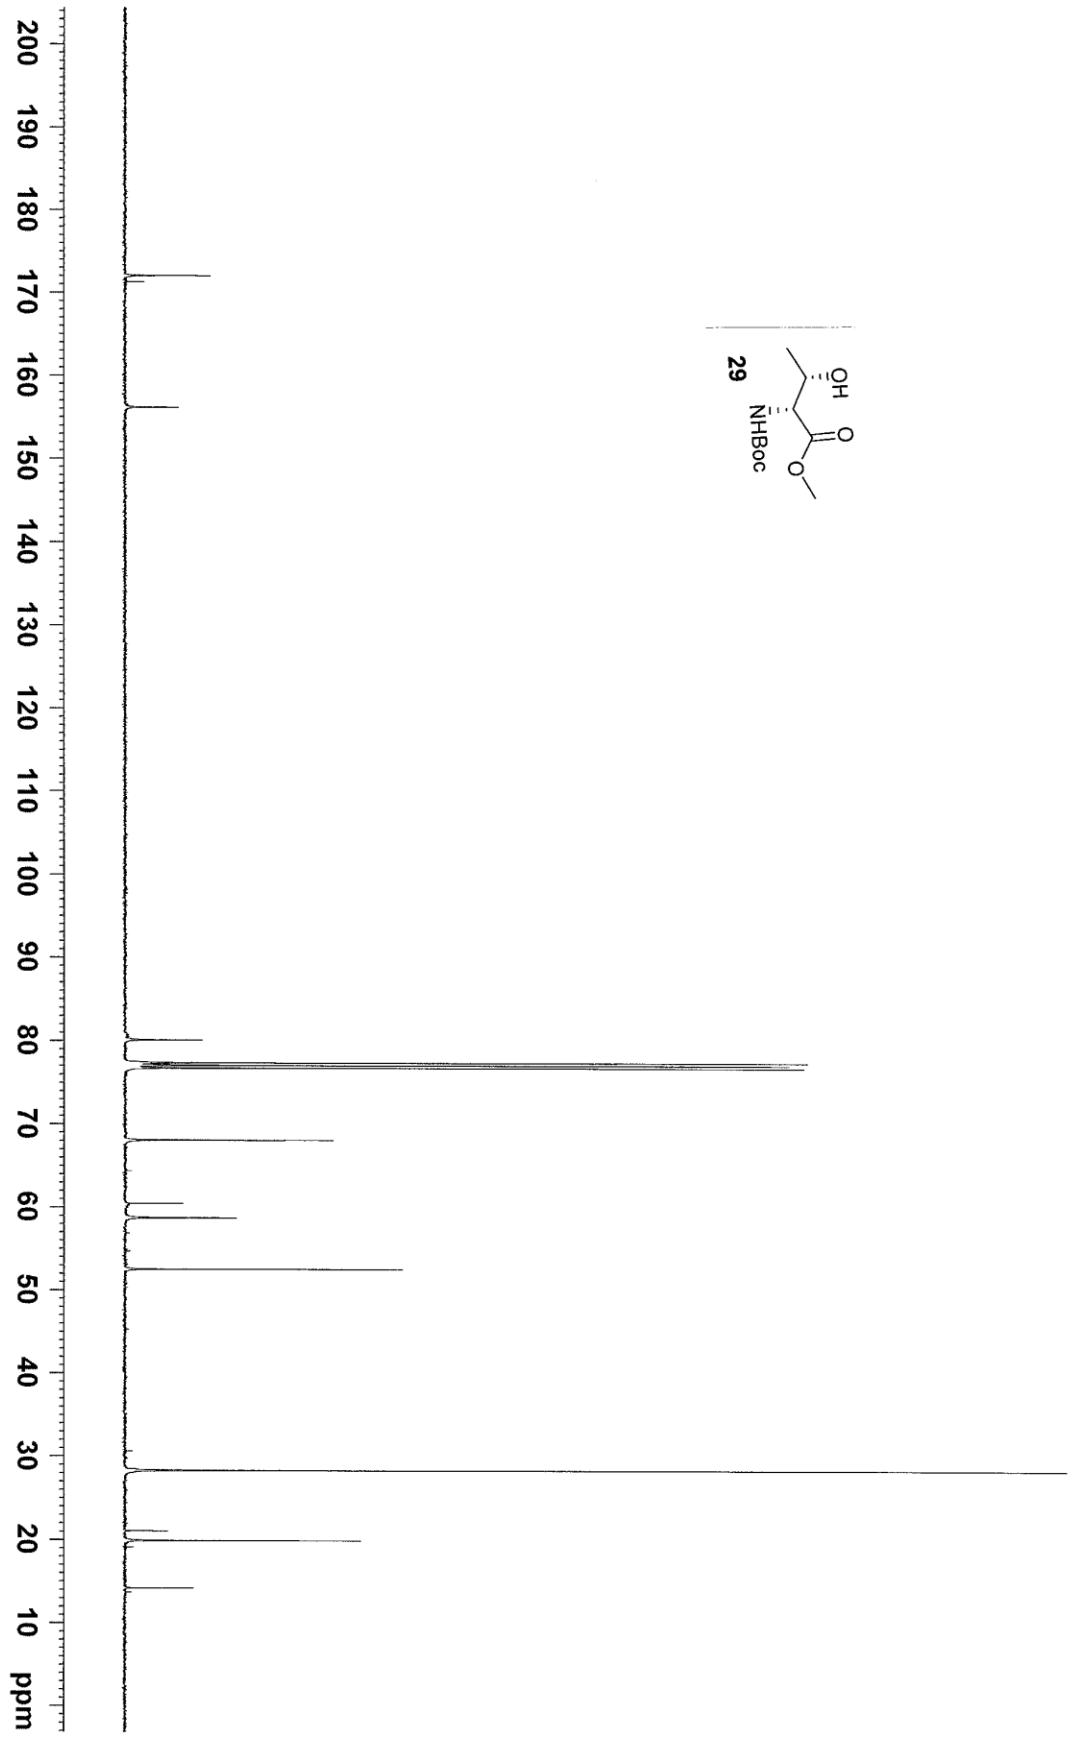

## Determination of racemization of the optically active esters via HPLC

Chromatography condition: <sup>i</sup>PrOH:Hexanes (30:70), Daicel Chiralcel OD-H column, 0.5ml/min, 254 nm

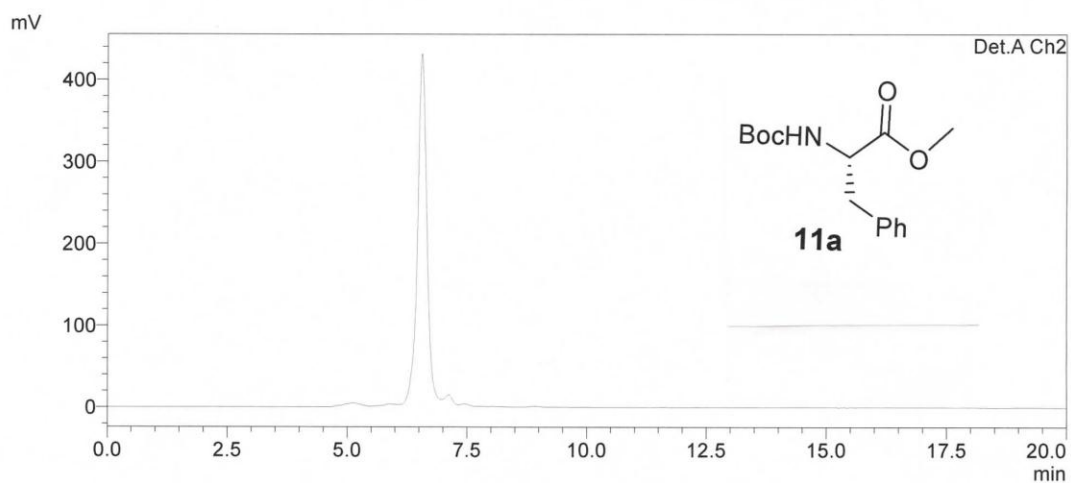

Chromatography condition: <sup>i</sup>PrOH:Hexanes (30:70), Daicel Chiralcel OD-H column, 0.5ml/min, 254 nm

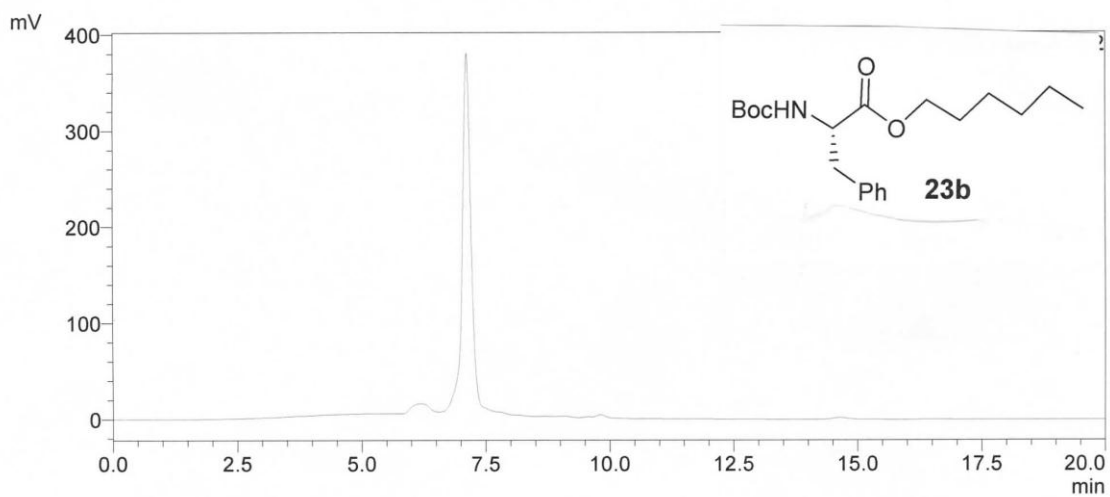

Chromatography condition: *i*PrOH:Hexanes (30:70), Daicel Chiralcel OD-H column, 0.5ml/min, 254 nm

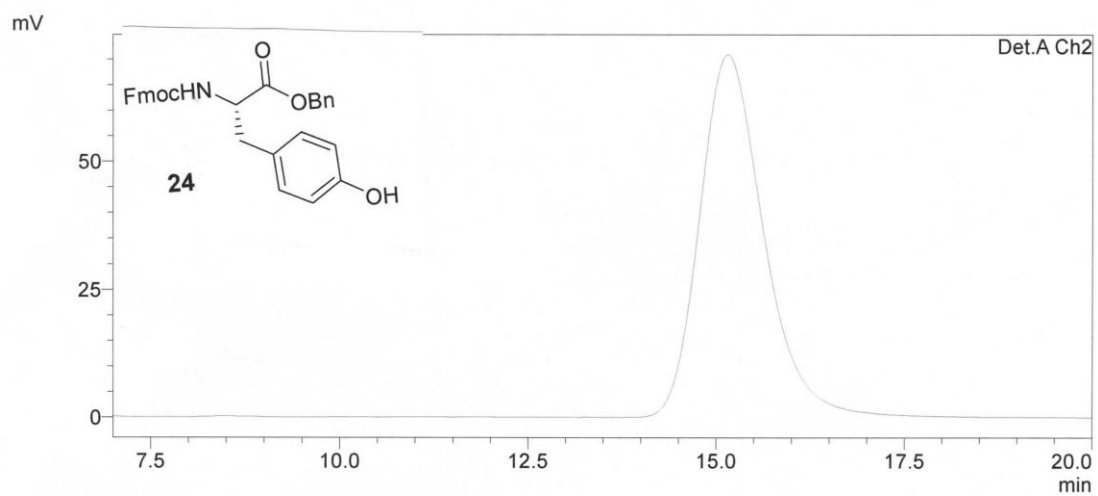

Chromatography condition: *i*PrOH:Hexanes (30:70), Daicel Chiralcel OD-H column, 0.5ml/min, 254 nm

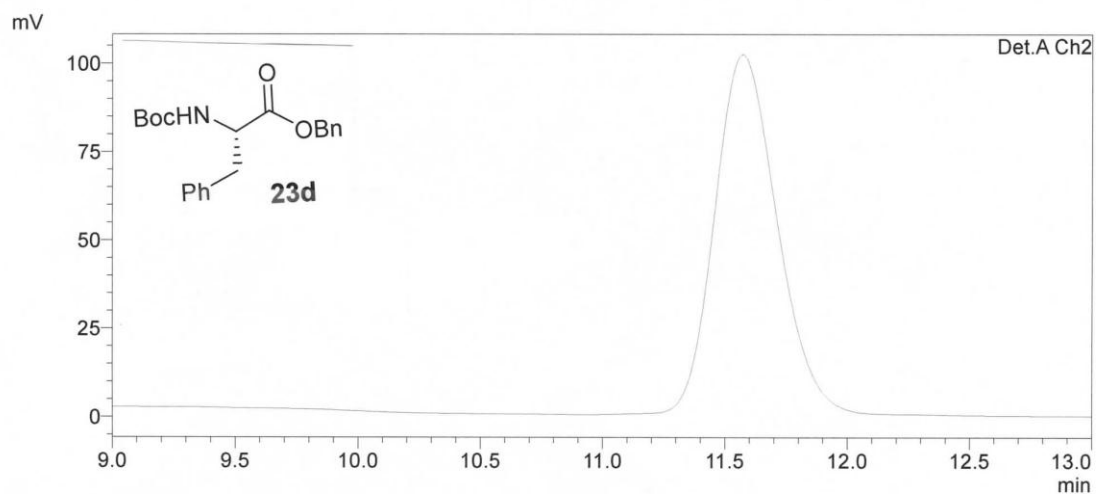

Chromatography condition: <sup>i</sup>PrOH:Hexanes (30:70), Daicel Chiralcel OD-H column, 0.5ml/min, 254 nm

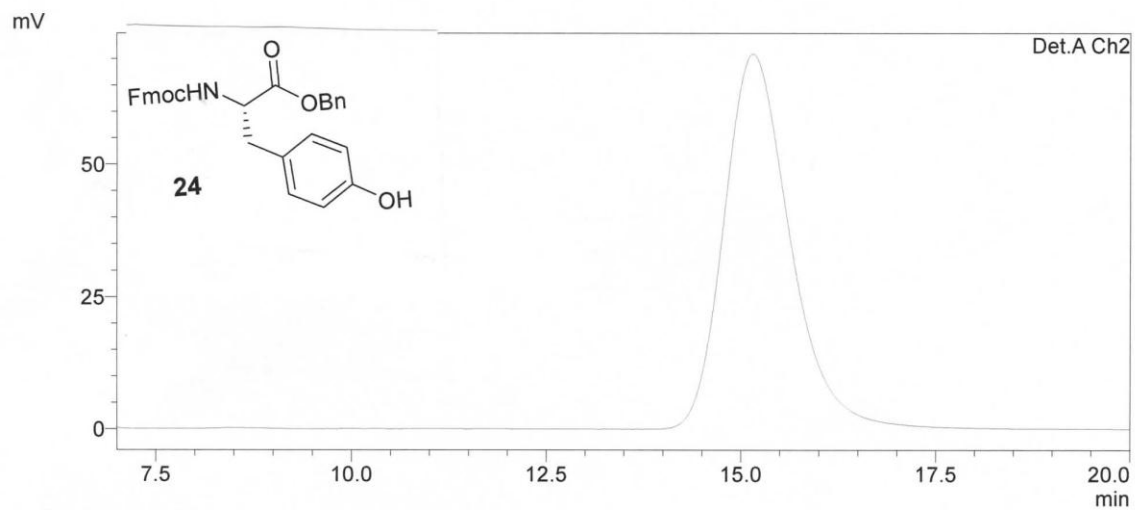

Chromatography condition: <sup>i</sup>PrOH:Hexanes (30:70), Daicel Chiralcel OD-H column, 0.5ml/min, 254 nm

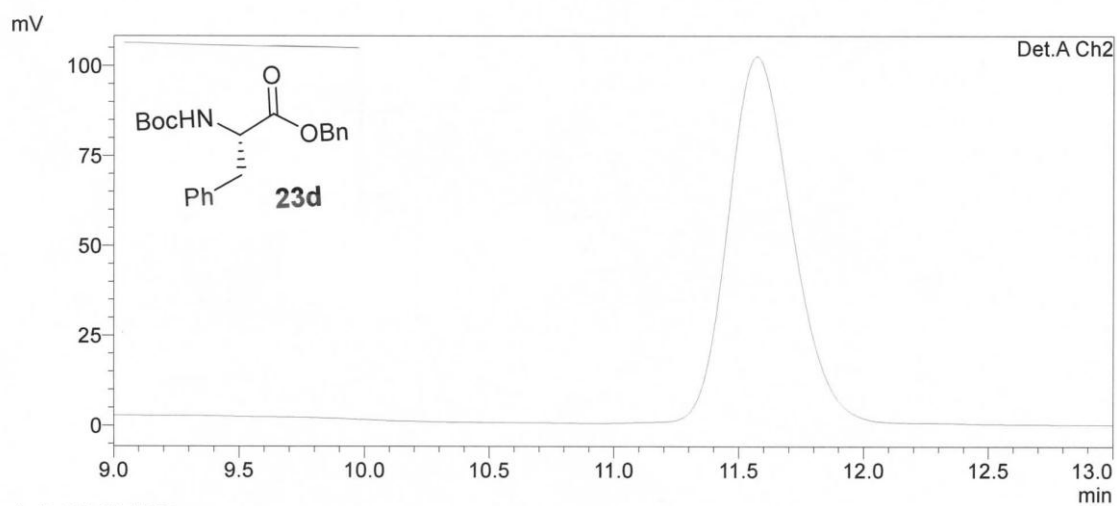

Chromatography condition: <sup>i</sup>PrOH:Hexanes (30:70), Daicel Chiralcel OD-H column, 0.5ml/min, 254 nm

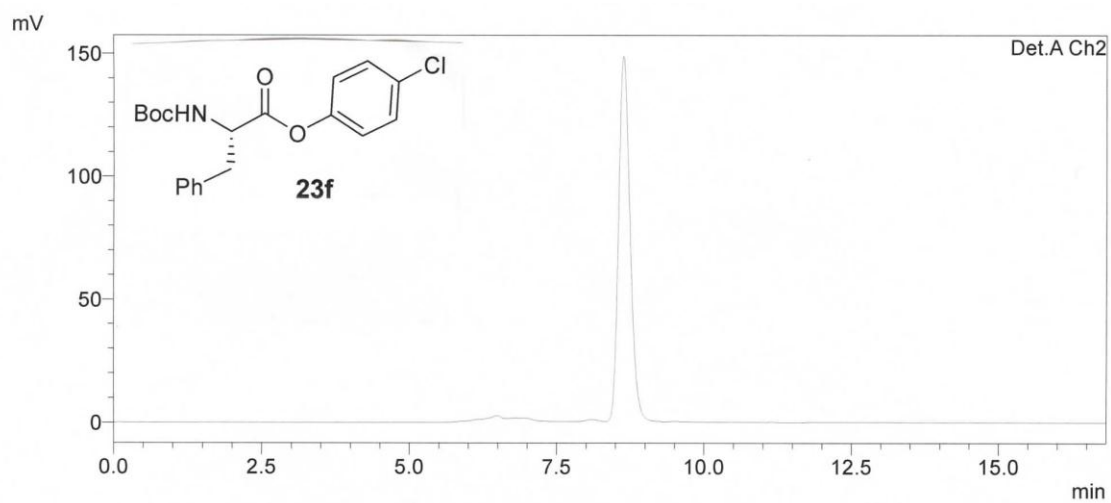

Chromatography condition: <sup>i</sup>PrOH:Hexanes (30:70), Daicel Chiralcel OD-H column, 0.5ml/min, 254 nm

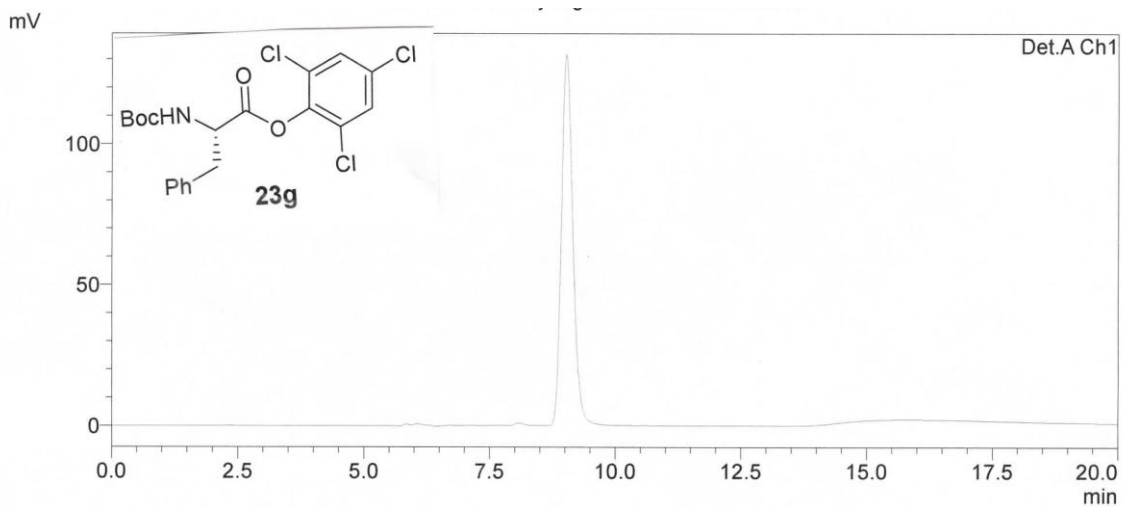

Chromatography condition: <sup>1</sup>PrOH:Hexanes (30:70), Daicel Chiralcel OD-H column, 0.5ml/min, 254 nm

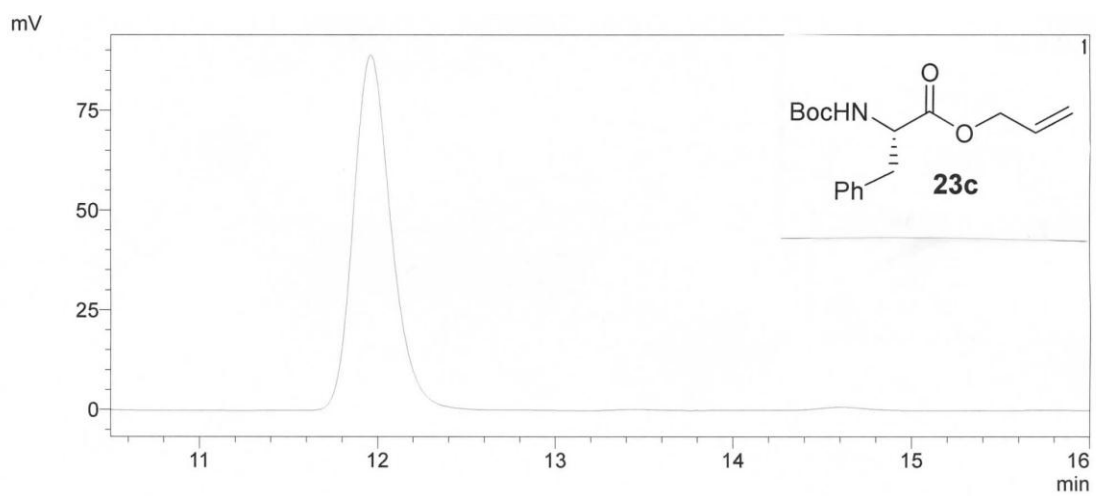

Chromatography condition: <sup>1</sup>PrOH:Hexanes (30:70), Daicel Chiralcel OD-H column, 0.5ml/min, 254 nm

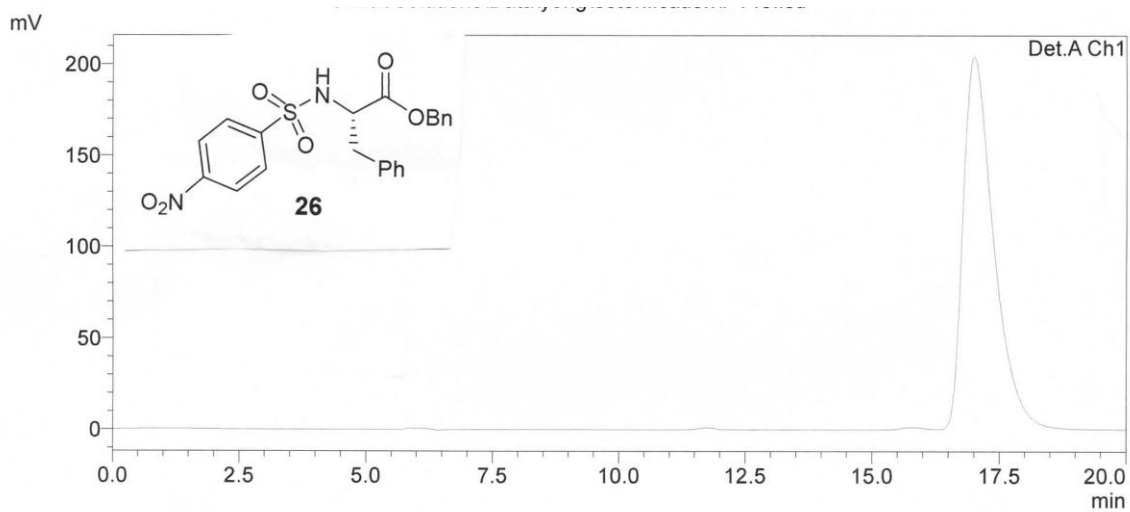

Chromatography condition: *i*PrOH:Hexanes (30:70), Daicel Chiralcel OD-H column, 0.5ml/min, 254 nm

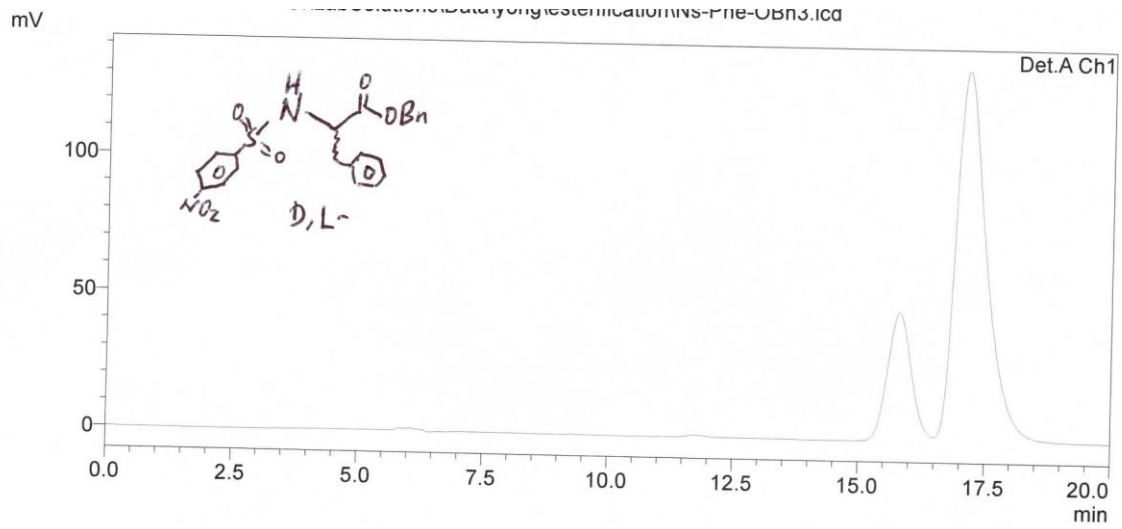

Chromatography condition: *i*PrOH:Hexanes (30:70), Daicel Chiralcel OD-H column, 0.5ml/min, 254 nm

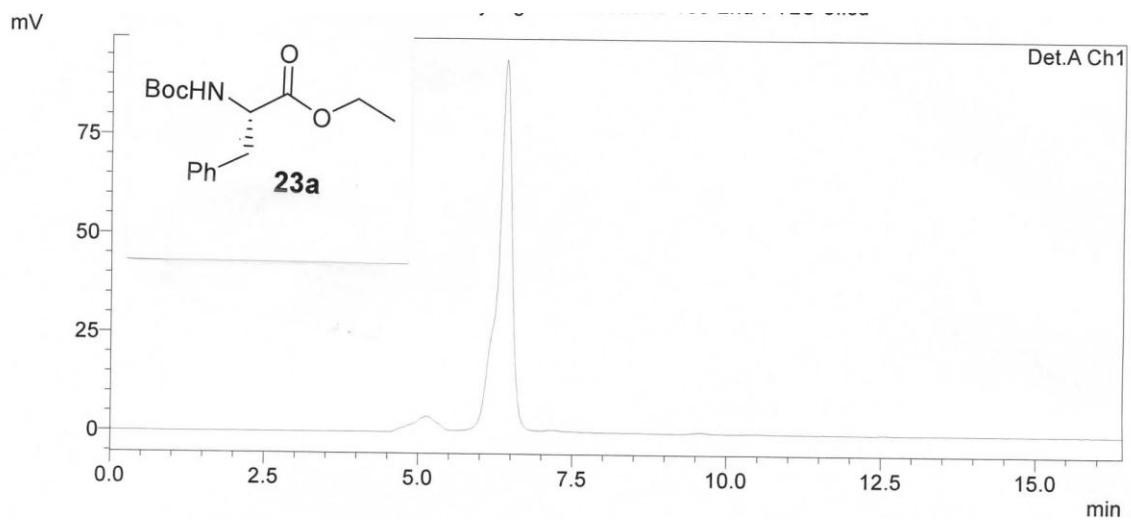



Chromatography condition: *i*PrOH:Hexanes (30:70), Daicel Chiralcel OD-H column, 0.5ml/min, 254 nm

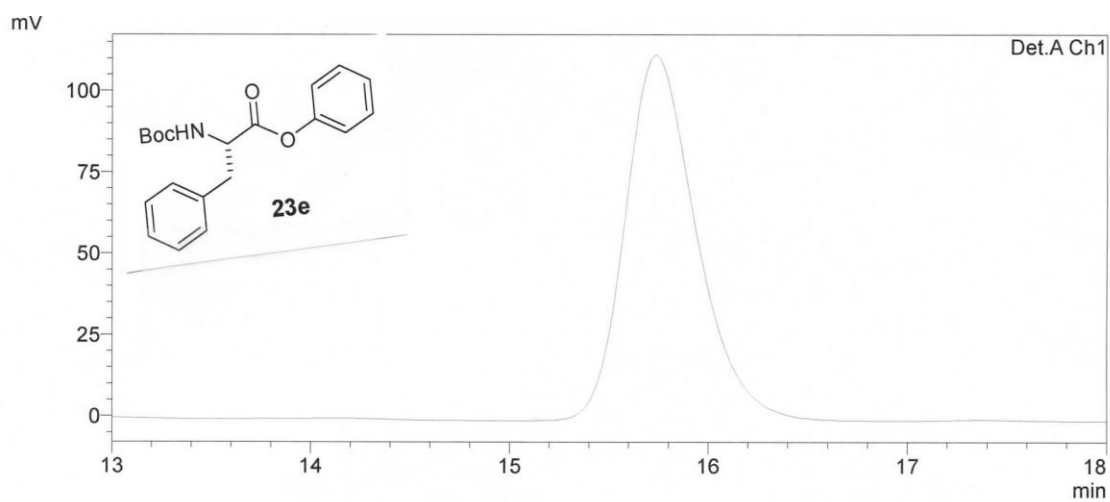

Chromatography condition: *i*PrOH:Hexanes (30:70), Daicel Chiralcel OD-H column, 0.5ml/min, 254 nm

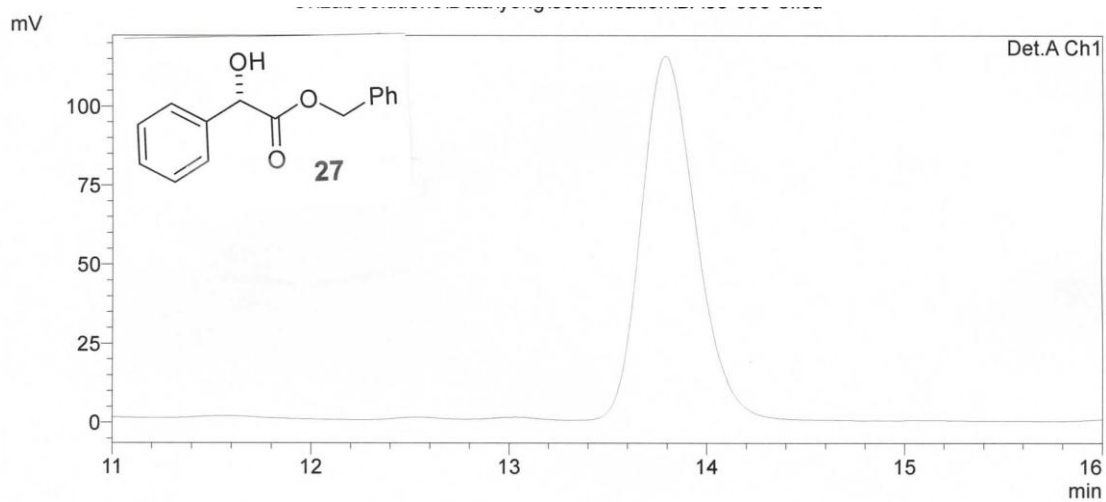

Chromatography condition: <sup>i</sup>PrOH:Hexanes (30:70), Daicel Chiralcel OD-H column, 0.5ml/min, 254 nm

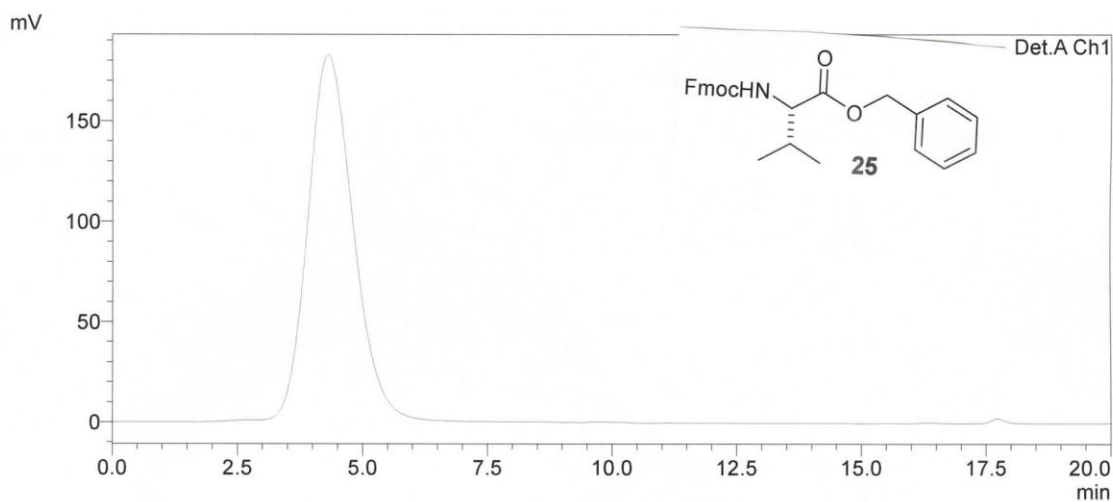

Chromatography condition: <sup>i</sup>PrOH:Hexanes (30:70), Daicel Chiralcel OD-H column, 0.5ml/min, 254 nm

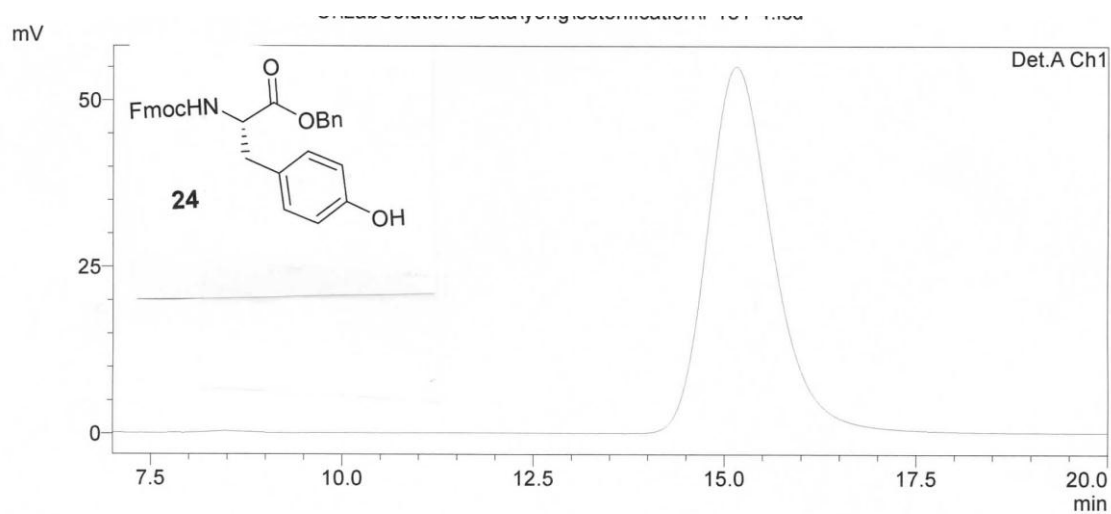

Chromatography condition: <sup>i</sup>PrOH:Hexanes (30:70), Daicel Chiralcel OD-H column, 0.5ml/min, 254 nm

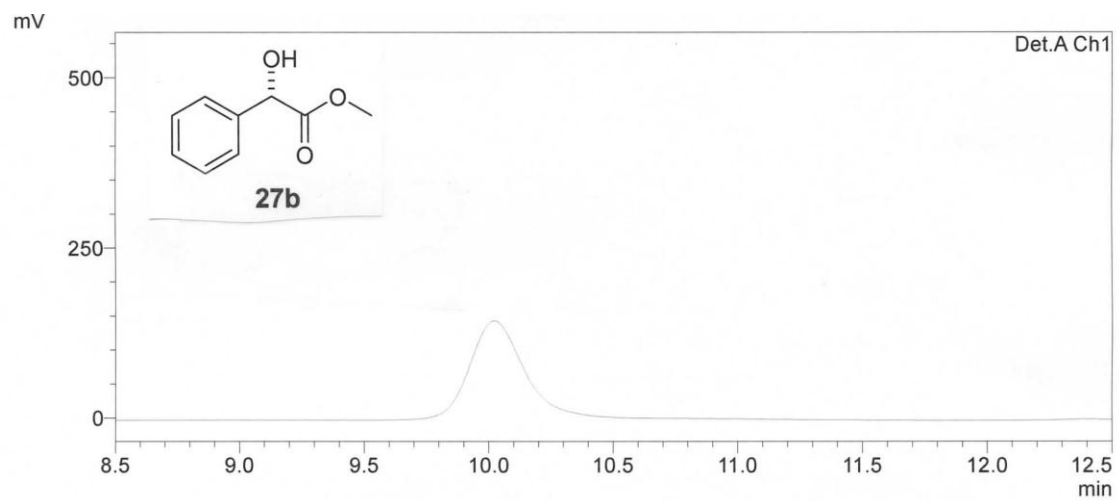

Supplement: NIHMS404377-supplement-SI.pdf [file NIHMS404377-supplement-SI.pdf]
